# Supplementary material for: Chemical Constituents of the Deep-Sea-Derived Penicillium solitum
Source: MDPI journal article supplement (doi:10.3390/md19100580), 2021-10-17
Supplement: s1 [file s1]

## Supporting Information

# Chemical Constituents of the Deep-Sea-Derived *Penicillium solitum*

Zhi-Hui He <sup>1,†</sup>, Jia Wu <sup>2,†</sup>, Lin Xu <sup>1</sup>, Man-Yi Hu <sup>1</sup>, Ming-Ming Xie <sup>1</sup>, You-Jia Hao <sup>1</sup>, Shu-Jin Li <sup>1</sup>,  
Zongze Shao <sup>1</sup> and Xian-Wen Yang <sup>1,\*</sup>

<sup>1</sup> Key Laboratory of Marine Biogenetic Resources, Third Institute of Oceanography, Ministry of Natural Resources, 184 Daxue Road, Xiamen 361005, China; hezhihui@tio.org.cn (Z.-H.H.); xulin@tio.org.cn (L.X.); humanyi@tio.org.cn (M.-Y.H.); xiemingmin@tio.org.cn (M.-M.X.); haoyoujia888@163.com (Y.-J.H.); lishujin98@163.com (S.-J.L.); shaozongze@tio.org.cn (Z.S.)

<sup>2</sup> Yanjing Medical College, Capital Medical University, 4 Dadong Road, Beijing 101300, China; wujia@ccmu.edu.cn

\* Correspondence: yangxianwen@tio.org.cn; +86-592-219-5319

† These authors contributed equally to this work.

## Content

### 1. ECD Calculation

Table S1. Energies analysis for 1*S*,2*S*,8*S*,8*aR*,11*R*,13*R*-**1** at MMFF94 force field.

Table S2. Standard orientations at BP86/6-311G(d,p) level in MeOH.

### 2. Legends of Figures

Figure S1. <sup>1</sup>H NMR spectrum of **1** in MeOH-*d*<sub>4</sub>.

Figure S2. <sup>13</sup>C NMR spectrum of **1** in MeOH-*d*<sub>4</sub>.

Figure S3. HSQC NMR spectrum of **1** in MeOH-*d*<sub>4</sub>.

Figure S4. COSY NMR spectrum of **1** in MeOH-*d*<sub>4</sub>.

Figure S5. HMBC NMR spectrum of **1** in MeOH-*d*<sub>4</sub>.

Figure S6. NOESY NMR spectrum of **1** in MeOH-*d*<sub>4</sub>.

Figure S7. The HR-ESI-MS spectrum of **1**.

Figure S8. <sup>1</sup>H NMR spectrum of **2** in DMSO-*d*<sub>6</sub>.

Figure S9. <sup>13</sup>C NMR spectrum of **2** in DMSO-*d*<sub>6</sub>.

Figure S10. HSQC NMR spectrum of **2** in DMSO-*d*<sub>6</sub>.

Figure S11. COSY NMR spectrum of **2** in DMSO-*d*<sub>6</sub>.

Figure S12. HMBC NMR spectrum of **2** in DMSO-*d*<sub>6</sub>.

Figure S13. NOESY NMR spectrum of **2** in DMSO-*d*<sub>6</sub>.

Figure S14. The HR-ESI-MS spectrum of **2**.

Figure S15. <sup>1</sup>H NMR spectrum of **3** in MeOH-*d*<sub>4</sub>.

Figure S16. <sup>13</sup>C NMR spectrum of **3** in MeOH-*d*<sub>4</sub>.

Figure S17. HSQC NMR spectrum of **3** in MeOH-*d*<sub>4</sub>.

Figure S18. COSY NMR spectrum of **3** in MeOH-*d*<sub>4</sub>.

Figure S19. HMBC NMR spectrum of **3** in MeOH-*d*<sub>4</sub>.

Figure S20. NOESY NMR spectrum of **3** in MeOH-*d*<sub>4</sub>.

Figure S21. The HR-ESI-MS spectrum of **3**.

Figure S22. <sup>1</sup>H NMR spectrum of **4**.

Figure S23.  $^{13}\text{C}$  NMR spectrum of **4**.  
Figure S24.  $^1\text{H}$  NMR spectrum of **5**.  
Figure S25.  $^{13}\text{C}$  NMR spectrum of **5**.  
Figure S26.  $^1\text{H}$  NMR spectrum of **6**.  
Figure S27.  $^{13}\text{C}$  NMR spectrum of **6**.  
Figure S28.  $^1\text{H}$  NMR spectrum of **7**.  
Figure S29.  $^{13}\text{C}$  NMR spectrum of **7**.  
Figure S30.  $^1\text{H}$  NMR spectrum of **8**.  
Figure S31.  $^{13}\text{C}$  NMR spectrum of **8**.  
Figure S32.  $^1\text{H}$  NMR spectrum of **9**.  
Figure S33.  $^{13}\text{C}$  NMR spectrum of **9**.  
Figure S34.  $^1\text{H}$  NMR spectrum of **10**.  
Figure S35.  $^{13}\text{C}$  NMR spectrum of **10**.  
Figure S36.  $^1\text{H}$  NMR spectrum of **11**.  
Figure S37.  $^{13}\text{C}$  NMR spectrum of **11**.  
Figure S38.  $^1\text{H}$  NMR spectrum of **12**.  
Figure S39.  $^{13}\text{C}$  NMR spectrum of **12**.  
Figure S40.  $^1\text{H}$  NMR spectrum of **13**.  
Figure S41.  $^{13}\text{C}$  NMR spectrum of **13**.  
Figure S42.  $^1\text{H}$  NMR spectrum of **14**.  
Figure S43.  $^{13}\text{C}$  NMR spectrum of **14**.  
Figure S44.  $^1\text{H}$  NMR spectrum of **15**.  
Figure S45.  $^{13}\text{C}$  NMR spectrum of **15**.  
Figure S46.  $^1\text{H}$  NMR spectrum of **16**.  
Figure S47.  $^{13}\text{C}$  NMR spectrum of **16**.  
Figure S48.  $^1\text{H}$  NMR spectrum of **17**.  
Figure S49.  $^{13}\text{C}$  NMR spectrum of **17**.  
Figure S50.  $^1\text{H}$  NMR spectrum of **18**.  
Figure S51.  $^{13}\text{C}$  NMR spectrum of **18**.  
Figure S52.  $^1\text{H}$  NMR spectrum of **19**.  
Figure S53.  $^{13}\text{C}$  NMR spectrum of **19**.  
Figure S54.  $^1\text{H}$  NMR spectrum of **20**.  
Figure S55.  $^{13}\text{C}$  NMR spectrum of **20**.  
Figure S56.  $^1\text{H}$  NMR spectrum of **21**.  
Figure S57.  $^{13}\text{C}$  NMR spectrum of **21**.  
Figure S58.  $^1\text{H}$  NMR spectrum of **22**.  
Figure S59.  $^{13}\text{C}$  NMR spectrum of **22**.  
Figure S60.  $^1\text{H}$  NMR spectrum of **23**.  
Figure S61.  $^{13}\text{C}$  NMR spectrum of **23**.  
Figure S62.  $^1\text{H}$  NMR spectrum of **24**.  
Figure S63.  $^{13}\text{C}$  NMR spectrum of **24**.  
Figure S64.  $^1\text{H}$  NMR spectrum of **25**.  
Figure S65.  $^{13}\text{C}$  NMR spectrum of **25**.

**Table S1.** Energies analysis for 1*S*,2*S*,8*S*,8*aR*,11*R*,13*R*-1 at MMFF94 force field.

| Configuration                                                                | Conformer | Structure                                                                          | E (kcal/mol) | Population (%) |
|------------------------------------------------------------------------------|-----------|------------------------------------------------------------------------------------|--------------|----------------|
| 1 <i>S</i> ,2 <i>S</i> ,8 <i>S</i> ,8 <i>aR</i> ,11 <i>R</i> ,13 <i>R</i> -1 | 1         | 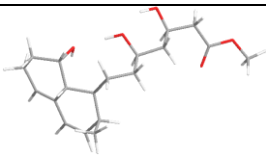 | 26.35        | 97.09          |
| 1 <i>S</i> ,2 <i>S</i> ,8 <i>S</i> ,8 <i>aR</i> ,11 <i>R</i> ,13 <i>R</i> -1 | 2         |   | 25.46        | 1.69           |
| 1 <i>S</i> ,2 <i>S</i> ,8 <i>S</i> ,8 <i>aR</i> ,11 <i>R</i> ,13 <i>R</i> -1 | 3         |  | 26.38        | 1.22           |

**Table S2.** Standard orientations at BP86/6-311G(d,p) level in MeOH..

| Conformer 1 <i>S</i> ,2 <i>S</i> ,8 <i>S</i> ,8 <i>aR</i> ,11 <i>R</i> ,13 <i>R</i> -1-1 |               |             |                         |           |           |
|------------------------------------------------------------------------------------------|---------------|-------------|-------------------------|-----------|-----------|
| 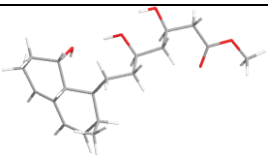      |               |             |                         |           |           |
| SCF Energy (BP86): -1118.500294 Hartree: -701869.5253 kcal/mol                           |               |             |                         |           |           |
| Center Number                                                                            | Atomic Number | Atomic Type | Coordinates (Angstroms) |           |           |
|                                                                                          |               |             | X                       | Y         | Z         |
| 1                                                                                        | 6             | 0           | 2.867822                | 3.147789  | 1.468235  |
| 2                                                                                        | 6             | 0           | 2.154288                | 2.410052  | 0.312449  |
| 3                                                                                        | 6             | 0           | 2.866963                | 2.688329  | -0.988051 |
| 4                                                                                        | 6             | 0           | 3.627330                | 1.781452  | -1.621223 |
| 5                                                                                        | 6             | 0           | 3.866983                | 0.435824  | -1.102085 |
| 6                                                                                        | 6             | 0           | 4.538898                | -0.476190 | -1.835442 |
| 7                                                                                        | 6             | 0           | 4.835799                | -1.883640 | -1.395952 |
| 8                                                                                        | 6             | 0           | 4.517470                | -2.101492 | 0.090216  |
| 9                                                                                        | 6             | 0           | 3.218984                | -1.399546 | 0.500503  |
| 10                                                                                       | 8             | 0           | 2.087476                | -1.959657 | -0.199993 |
| 11                                                                                       | 6             | 0           | 3.319407                | 0.126992  | 0.293194  |
| 12                                                                                       | 6             | 0           | 1.973675                | 0.877208  | 0.507142  |
| 13                                                                                       | 6             | 0           | 1.242435                | 0.511979  | 1.818578  |
| 14                                                                                       | 6             | 0           | -0.289366               | 0.651626  | 1.756250  |
| 15                                                                                       | 6             | 0           | -0.970086               | -0.337580 | 0.789780  |
| 16                                                                                       | 6             | 0           | -2.493979               | -0.318807 | 0.935028  |
| 17                                                                                       | 6             | 0           | -3.215076               | -1.244406 | -0.058615 |
| 18                                                                                       | 8             | 0           | -2.964162               | -2.614537 | 0.223438  |

|    |   |   |           |           |           |
|----|---|---|-----------|-----------|-----------|
| 19 | 6 | 0 | -4.736768 | -1.086073 | -0.020417 |
| 20 | 6 | 0 | -5.245648 | 0.213915  | -0.601914 |
| 21 | 8 | 0 | -4.570584 | 1.090367  | -1.102697 |
| 22 | 8 | 0 | -6.593754 | 0.288817  | -0.503588 |
| 23 | 6 | 0 | -7.185701 | 1.481575  | -1.040589 |
| 24 | 8 | 0 | -0.518550 | -1.682859 | 1.023052  |
| 25 | 1 | 0 | 3.856446  | 2.720373  | 1.670365  |
| 26 | 1 | 0 | 2.285252  | 3.121739  | 2.394805  |
| 27 | 1 | 0 | 3.017402  | 4.201395  | 1.205739  |
| 28 | 1 | 0 | 1.147509  | 2.847274  | 0.235345  |
| 29 | 1 | 0 | 2.755253  | 3.685726  | -1.411050 |
| 30 | 1 | 0 | 4.103981  | 2.035279  | -2.567089 |
| 31 | 1 | 0 | 4.889192  | -0.187847 | -2.826857 |
| 32 | 1 | 0 | 4.260788  | -2.592569 | -2.013264 |
| 33 | 1 | 0 | 5.888437  | -2.125783 | -1.595819 |
| 34 | 1 | 0 | 4.441152  | -3.170584 | 0.316177  |
| 35 | 1 | 0 | 5.330981  | -1.695375 | 0.705607  |
| 36 | 1 | 0 | 3.018104  | -1.621673 | 1.550683  |
| 37 | 1 | 0 | 2.139446  | -1.658812 | -1.122930 |
| 38 | 1 | 0 | 4.045536  | 0.495865  | 1.034615  |
| 39 | 1 | 0 | 1.332684  | 0.560686  | -0.325590 |
| 40 | 1 | 0 | 1.627472  | 1.114780  | 2.648669  |
| 41 | 1 | 0 | 1.445042  | -0.525530 | 2.095007  |
| 42 | 1 | 0 | -0.582526 | 1.672375  | 1.473865  |
| 43 | 1 | 0 | -0.691763 | 0.475800  | 2.762573  |
| 44 | 1 | 0 | -0.730462 | -0.056215 | -0.248249 |
| 45 | 1 | 0 | -2.761386 | -0.623826 | 1.956497  |
| 46 | 1 | 0 | -2.839091 | 0.710290  | 0.785806  |
| 47 | 1 | 0 | -2.871775 | -0.988277 | -1.076301 |
| 48 | 1 | 0 | -2.020015 | -2.657169 | 0.476152  |
| 49 | 1 | 0 | -5.186848 | -1.914123 | -0.582085 |
| 50 | 1 | 0 | -5.109127 | -1.189744 | 1.006527  |
| 51 | 1 | 0 | -6.970952 | 1.572121  | -2.108989 |
| 52 | 1 | 0 | -8.258352 | 1.376731  | -0.873914 |
| 53 | 1 | 0 | -6.802461 | 2.367885  | -0.527429 |
| 54 | 1 | 0 | 0.356085  | -1.801874 | 0.596916  |

Conformer 1*S*,2*S*,8*S*,8*aR*,11*R*,13*R*-1-2

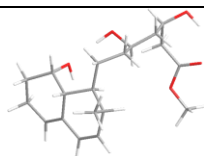

SCF Energy (BP86): -1118.496467 Hartree: -701867.1243 kcal/mol

| Center Number | Atomic Number | Atomic Type | Coordinates (Angstroms) |           |           |
|---------------|---------------|-------------|-------------------------|-----------|-----------|
|               |               |             | X                       | Y         | Z         |
| 1             | 6             | 0           | 2.669851                | 1.432245  | 3.067910  |
| 2             | 6             | 0           | 1.822800                | 1.519218  | 1.777791  |
| 3             | 6             | 0           | 2.409206                | 2.554101  | 0.849211  |
| 4             | 6             | 0           | 3.068033                | 2.245260  | -0.278862 |
| 5             | 6             | 0           | 3.311842                | 0.869909  | -0.711483 |
| 6             | 6             | 0           | 3.864952                | 0.613157  | -1.915196 |
| 7             | 6             | 0           | 4.154671                | -0.762085 | -2.451145 |
| 8             | 6             | 0           | 4.004478                | -1.842918 | -1.371362 |
| 9             | 6             | 0           | 2.785113                | -1.587400 | -0.479260 |



|    |   |   |           |           |           |
|----|---|---|-----------|-----------|-----------|
| 10 | 8 | 0 | 1.562491  | -1.667090 | -1.240491 |
| 11 | 6 | 0 | 2.909174  | -0.238715 | 0.262806  |
| 12 | 6 | 0 | 1.616508  | 0.175593  | 1.021747  |
| 13 | 6 | 0 | 1.015388  | -0.936870 | 1.908211  |
| 14 | 6 | 0 | -0.503401 | -0.827429 | 2.131971  |
| 15 | 6 | 0 | -1.342711 | -1.031201 | 0.851700  |
| 16 | 6 | 0 | -2.836216 | -1.124517 | 1.180975  |
| 17 | 6 | 0 | -3.747601 | -1.488228 | -0.005631 |
| 18 | 8 | 0 | -5.109599 | -1.532637 | 0.401211  |
| 19 | 6 | 0 | -3.576023 | -0.575026 | -1.239501 |
| 20 | 6 | 0 | -3.898695 | 0.871330  | -0.942833 |
| 21 | 8 | 0 | -4.778809 | 1.247342  | -0.186192 |
| 22 | 8 | 0 | -3.106835 | 1.726199  | -1.620175 |
| 23 | 6 | 0 | -3.387661 | 3.123748  | -1.422573 |
| 24 | 8 | 0 | -0.976859 | -2.221960 | 0.158758  |
| 25 | 1 | 0 | 3.659815  | 1.005065  | 2.872239  |
| 26 | 1 | 0 | 2.180961  | 0.829431  | 3.839811  |
| 27 | 1 | 0 | 2.825226  | 2.434239  | 3.484267  |
| 28 | 1 | 0 | 0.827144  | 1.876261  | 2.081404  |
| 29 | 1 | 0 | 2.292444  | 3.598961  | 1.134211  |
| 30 | 1 | 0 | 3.454868  | 3.037637  | -0.918384 |
| 31 | 1 | 0 | 4.114883  | 1.455022  | -2.561461 |
| 32 | 1 | 0 | 3.482996  | -0.978387 | -3.297571 |
| 33 | 1 | 0 | 5.165929  | -0.793458 | -2.878909 |
| 34 | 1 | 0 | 3.920805  | -2.835236 | -1.827607 |
| 35 | 1 | 0 | 4.897038  | -1.851737 | -0.731969 |
| 36 | 1 | 0 | 2.703646  | -2.403018 | 0.242458  |
| 37 | 1 | 0 | 1.517757  | -0.873196 | -1.799412 |
| 38 | 1 | 0 | 3.721304  | -0.359126 | 0.997026  |
| 39 | 1 | 0 | 0.883002  | 0.401182  | 0.237198  |
| 40 | 1 | 0 | 1.524827  | -0.966812 | 2.878225  |
| 41 | 1 | 0 | 1.188338  | -1.917497 | 1.458313  |
| 42 | 1 | 0 | -0.768872 | 0.141635  | 2.578146  |
| 43 | 1 | 0 | -0.798671 | -1.597678 | 2.856313  |
| 44 | 1 | 0 | -1.191478 | -0.160487 | 0.190690  |
| 45 | 1 | 0 | -2.993890 | -1.890433 | 1.950048  |
| 46 | 1 | 0 | -3.165246 | -0.169775 | 1.613146  |
| 47 | 1 | 0 | -3.496256 | -2.502137 | -0.326020 |
| 48 | 1 | 0 | -5.374797 | -0.604562 | 0.537728  |
| 49 | 1 | 0 | -2.572751 | -0.660197 | -1.663509 |
| 50 | 1 | 0 | -4.287042 | -0.913848 | -2.004460 |
| 51 | 1 | 0 | -3.262454 | 3.395262  | -0.371224 |
| 52 | 1 | 0 | -2.668471 | 3.656026  | -2.045502 |
| 53 | 1 | 0 | -4.410540 | 3.356284  | -1.729796 |
| 54 | 1 | 0 | -0.131881 | -2.065296 | -0.307160 |

Conformer 1S,2S,8S,8aR,11R,13R-1-3

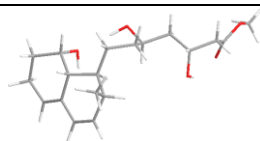

SCF Energy (BP86): -1118.496162 Hartree: -701866.9326 kcal/mol

| Center<br>Number | Atomic<br>Number | Atomic<br>Type | Coordinates (Angstroms) |   |   |
|------------------|------------------|----------------|-------------------------|---|---|
|                  |                  |                | X                       | Y | Z |

|    |   |   |           |           |           |
|----|---|---|-----------|-----------|-----------|
| 1  | 6 | 0 | -2.760521 | 3.187630  | -0.895459 |
| 2  | 6 | 0 | -2.135658 | 2.216564  | 0.131906  |
| 3  | 6 | 0 | -2.919893 | 2.261119  | 1.420076  |
| 4  | 6 | 0 | -3.730086 | 1.271817  | 1.827684  |
| 5  | 6 | 0 | -3.959709 | 0.055129  | 1.050474  |
| 6  | 6 | 0 | -4.684279 | -0.962555 | 1.560725  |
| 7  | 6 | 0 | -4.973335 | -2.254900 | 0.847848  |
| 8  | 6 | 0 | -4.572201 | -2.197670 | -0.633142 |
| 9  | 6 | 0 | -3.244357 | -1.459881 | -0.834333 |
| 10 | 8 | 0 | -2.158889 | -2.162583 | -0.196885 |
| 11 | 6 | 0 | -3.340756 | 0.002786  | -0.347926 |
| 12 | 6 | 0 | -1.974974 | 0.747136  | -0.351348 |
| 13 | 6 | 0 | -1.197796 | 0.623840  | -1.680020 |
| 14 | 6 | 0 | 0.325056  | 0.798587  | -1.546013 |
| 15 | 6 | 0 | 1.003282  | -0.321060 | -0.726669 |
| 16 | 6 | 0 | 2.532452  | -0.288964 | -0.832793 |
| 17 | 6 | 0 | 3.183897  | 1.002108  | -0.313639 |
| 18 | 8 | 0 | 2.778499  | 1.322748  | 1.012258  |
| 19 | 6 | 0 | 4.724264  | 0.965137  | -0.422555 |
| 20 | 6 | 0 | 5.354853  | -0.081062 | 0.472290  |
| 21 | 8 | 0 | 4.898025  | -0.454369 | 1.540272  |
| 22 | 8 | 0 | 6.511612  | -0.546575 | -0.029460 |
| 23 | 6 | 0 | 7.200978  | -1.514468 | 0.783933  |
| 24 | 8 | 0 | 0.607244  | -1.615183 | -1.177730 |
| 25 | 1 | 0 | -3.741637 | 2.837701  | -1.236268 |
| 26 | 1 | 0 | -2.119808 | 3.323601  | -1.772749 |
| 27 | 1 | 0 | -2.907355 | 4.174249  | -0.440826 |
| 28 | 1 | 0 | -1.126907 | 2.596552  | 0.350695  |
| 29 | 1 | 0 | -2.815892 | 3.156508  | 2.031517  |
| 30 | 1 | 0 | -4.256534 | 1.354657  | 2.777725  |
| 31 | 1 | 0 | -5.085218 | -0.858710 | 2.569428  |
| 32 | 1 | 0 | -4.443032 | -3.079920 | 1.350272  |
| 33 | 1 | 0 | -6.038773 | -2.506064 | 0.941603  |
| 34 | 1 | 0 | -4.495380 | -3.207392 | -1.051082 |
| 35 | 1 | 0 | -5.345019 | -1.666201 | -1.204141 |
| 36 | 1 | 0 | -2.990746 | -1.483102 | -1.896337 |
| 37 | 1 | 0 | -2.254230 | -2.031470 | 0.761593  |
| 38 | 1 | 0 | -4.021283 | 0.521175  | -1.041947 |
| 39 | 1 | 0 | -1.376254 | 0.256117  | 0.426086  |
| 40 | 1 | 0 | -1.586689 | 1.339747  | -2.413712 |
| 41 | 1 | 0 | -1.354161 | -0.363357 | -2.120786 |
| 42 | 1 | 0 | 0.564580  | 1.770447  | -1.094966 |
| 43 | 1 | 0 | 0.759689  | 0.798776  | -2.555626 |
| 44 | 1 | 0 | 0.745661  | -0.193165 | 0.334625  |
| 45 | 1 | 0 | 2.917140  | -1.150284 | -0.272634 |
| 46 | 1 | 0 | 2.813136  | -0.442776 | -1.884555 |
| 47 | 1 | 0 | 2.845557  | 1.844297  | -0.927668 |
| 48 | 1 | 0 | 3.215417  | 0.664511  | 1.585351  |
| 49 | 1 | 0 | 5.051696  | 0.806247  | -1.454630 |
| 50 | 1 | 0 | 5.118447  | 1.938780  | -0.101750 |
| 51 | 1 | 0 | 6.579871  | -2.401827 | 0.929130  |
| 52 | 1 | 0 | 8.106705  | -1.764781 | 0.231545  |
| 53 | 1 | 0 | 7.448335  | -1.088124 | 1.759439  |
| 54 | 1 | 0 | -0.286544 | -1.806261 | -0.833217 |

Figure S1. <sup>1</sup>H NMR spectrum of 1 in MeOH-d<sub>4</sub>.

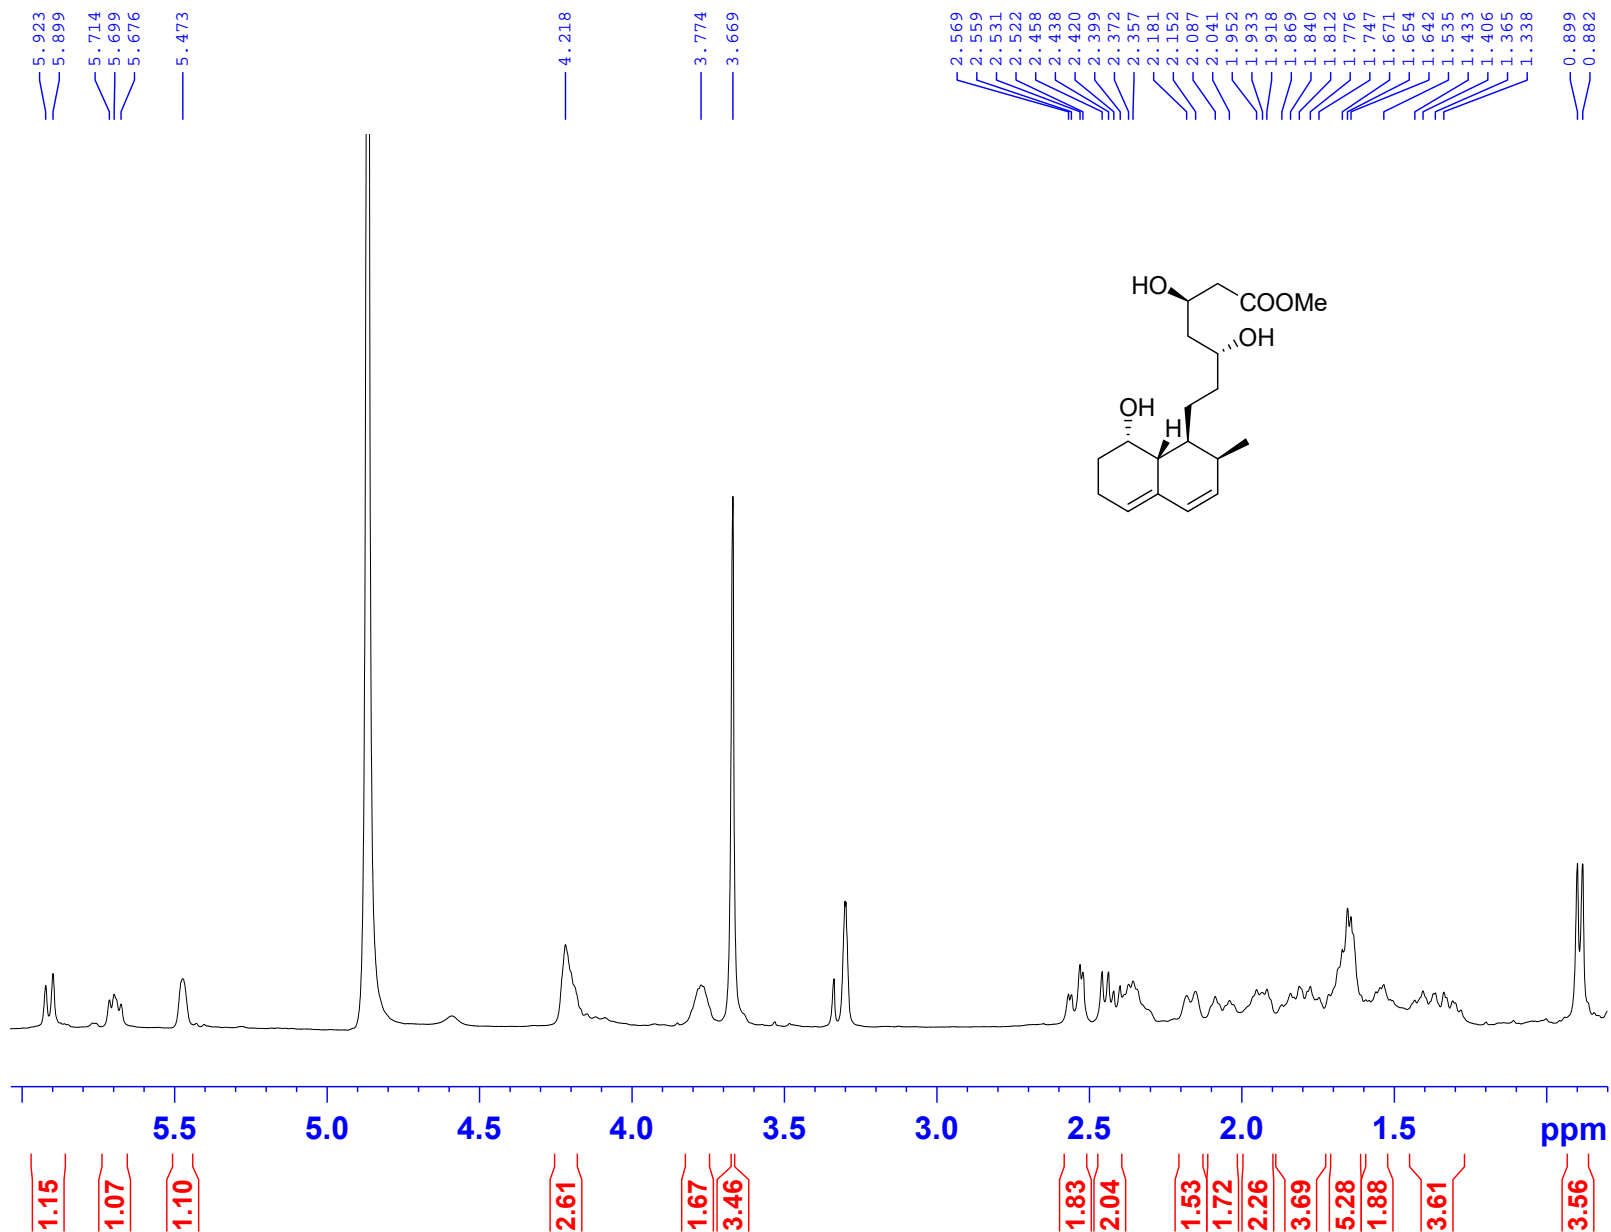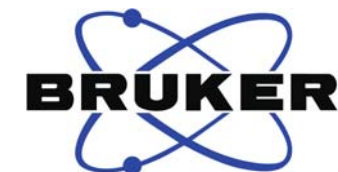

Current Data Parameters  
 NAME HB2-10 M 10mg  
 EXPNO 1  
 PROCNO 1

F2 - Acquisition Parameters  
 Date\_ 20200801  
 Time 13.35  
 INSTRUM spect  
 PROBHD 5 mm PABBO BB-  
 PULPROG zg30  
 TD 65536  
 SOLVENT MeOD  
 NS 19  
 DS 2  
 SWH 8012.820 Hz  
 FIDRES 0.122266 Hz  
 AQ 4.0894465 sec  
 RG 128  
 DW 62.400 usec  
 DE 6.50 usec  
 TE 296.5 K  
 D1 1.00000000 sec  
 TD0 1

===== CHANNEL f1 =====  
 SFO1 400.1324710 MHz  
 NUC1 1H  
 P1 13.90 usec  
 PLW1 12.14299965 W

F2 - Processing parameters  
 SI 32768  
 SF 400.1300116 MHz  
 WDW EM  
 SSB 0  
 LB 0.30 Hz  
 GB 0  
 PC 1.00

Figure S2. <sup>13</sup>C NMR spectrum of 1 in MeOH-d<sub>4</sub>.

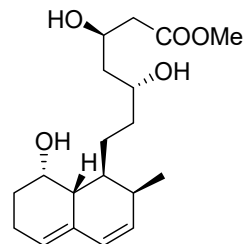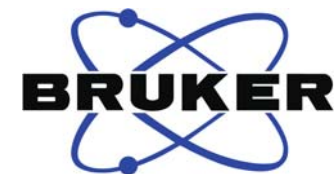

Current Data Parameters  
 NAME HB2-10 M 10mg  
 EXPNO 2  
 PROCNO 1

F2 - Acquisition Parameters  
 Date\_ 20200801  
 Time 13.38  
 INSTRUM spect  
 PROBHD 5 mm PABBO BB-  
 PULPROG zgpg30  
 TD 65536  
 SOLVENT MeOD  
 NS 482  
 DS 4  
 SWH 24038.461 Hz  
 FIDRES 0.366798 Hz  
 AQ 1.3631488 sec  
 RG 203  
 DW 20.800 usec  
 DE 6.50 usec  
 TE 296.6 K  
 D1 2.00000000 sec  
 D11 0.03000000 sec  
 TD0 1

===== CHANNEL f1 =====  
 SFO1 100.6228293 MHz  
 NUC1 <sup>13</sup>C  
 P1 12.37 usec  
 PLW1 28.13500023 W

===== CHANNEL f2 =====  
 SFO2 400.1316005 MHz  
 NUC2 <sup>1</sup>H  
 CPDPRG[2] waltz16  
 PCPD2 90.00 usec  
 PLW2 12.14299965 W  
 PLW12 0.28964999 W  
 PLW13 0.23461001 W

F2 - Processing parameters  
 SI 32768  
 SF 100.6126294 MHz  
 WDW EM  
 SSB 0  
 LB 1.00 Hz  
 GB 0  
 PC 1.40

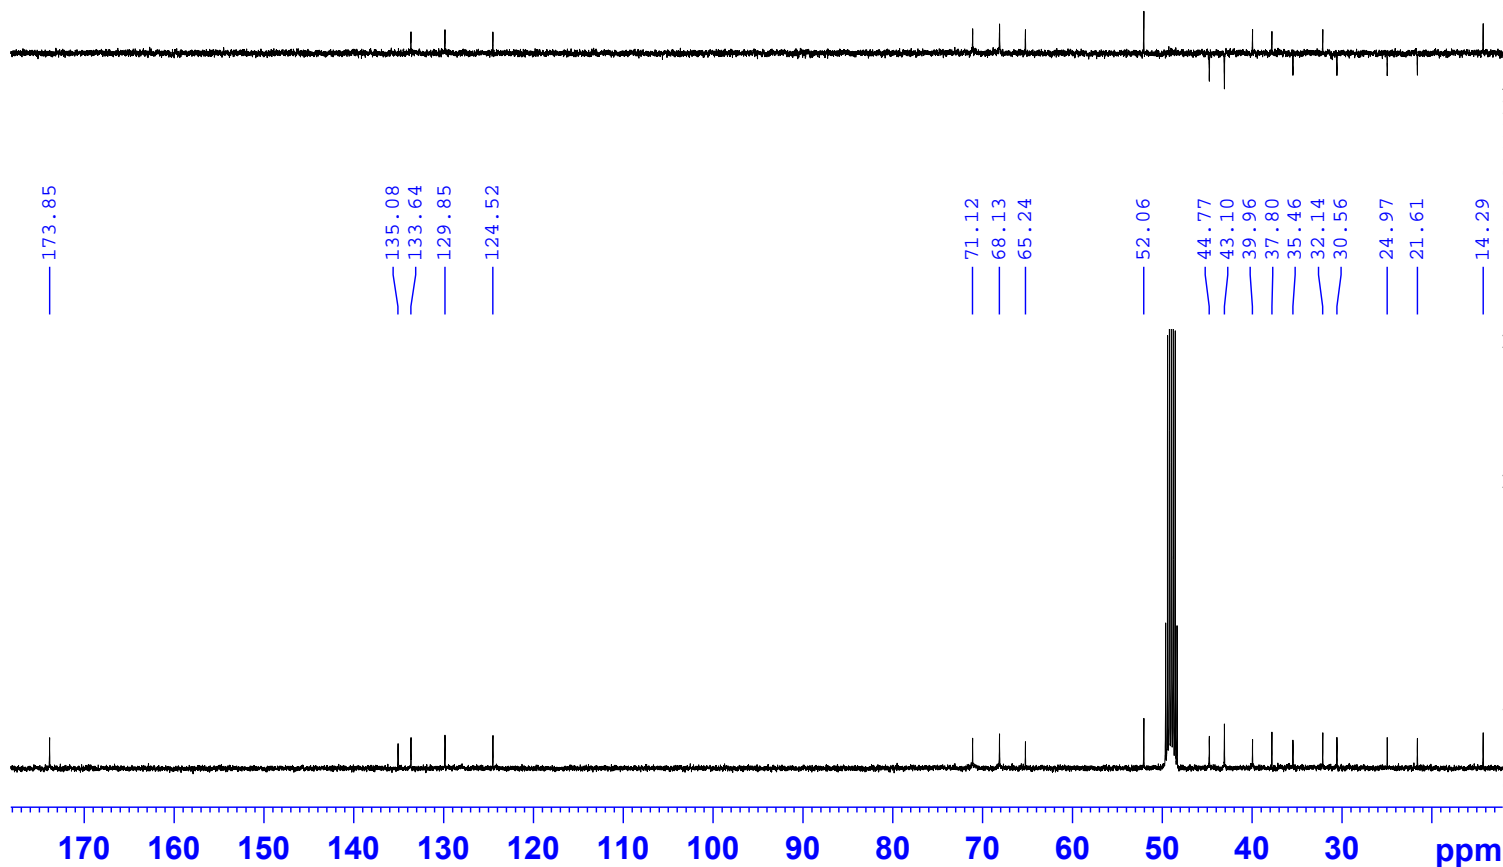

Figure S3. HSQC NMR spectrum of 1 in MeOH-d<sub>4</sub>.

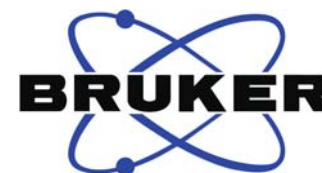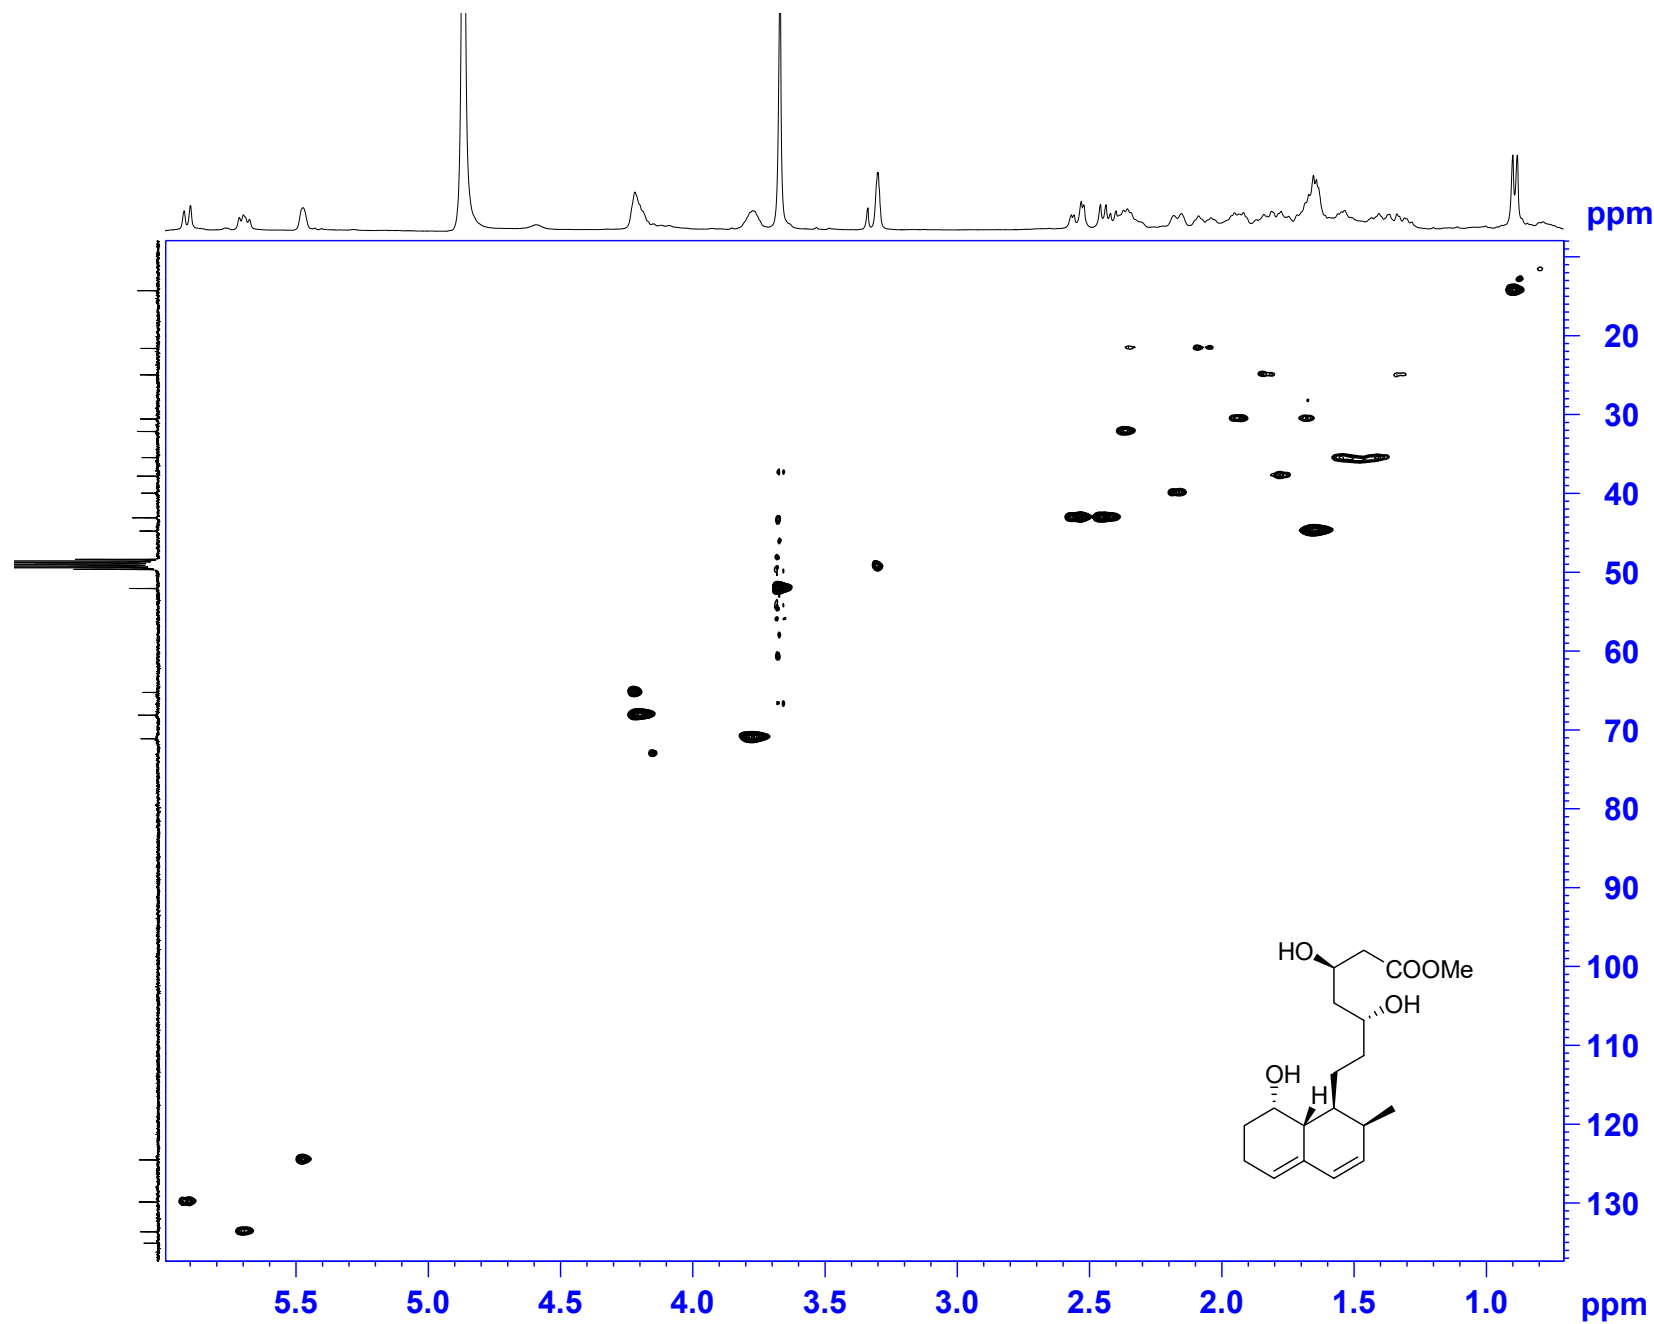

Current Data Parameters  
NAME HB2-10 M 10mg  
EXPNO 4  
PROCNO 1

F2 - Acquisition Parameters  
Date\_ 20200813  
Time 21.17  
INSTRUM spect  
PROBHD 5 mm PABBO BB-  
PULPROG hsqcetgpsi2.2  
TD 1024  
SOLVENT MeOD  
NS 16  
DS 32  
SWH 3201.024 Hz  
FIDRES 3.126000 Hz  
AQ 0.1599488 sec  
RG 203  
DW 156.200 usec  
DE 6.50 usec  
TE 296.1 K  
CNST2 145.000000  
CNST17 -0.500000  
D0 0.00000300 sec  
D1 2.00000000 sec  
D4 0.00172414 sec  
D11 0.03000000 sec  
D16 0.00020000 sec  
D24 0.00089000 sec  
INO 0.0002480 sec

===== CHANNEL f1 =====  
SFO1 400.1316005 MHz  
NUC1 1H  
P1 13.90 usec  
P2 27.80 usec  
P28 1000.00 usec  
PLW1 12.14299965 W

===== CHANNEL f2 =====  
SFO2 100.6228298 MHz  
NUC2 13C  
CPDPRG[2] garp  
P3 12.37 usec  
P14 500.00 usec  
P24 2000.00 usec  
PCPD2 70.00 usec  
PLW0 0 W  
PLW2 28.13500023 W  
PLW12 0.87860000 W  
SPNAM[3] Crp60,0.5,20.1  
SPOAL3 0.500  
SPOFFS3 0 Hz  
SPW3 6.57779980 W  
SPNAM[7] Crp60comp.4  
SPOAL7 0.500  
SPOFFS7 0 Hz  
SPW7 6.57779980 W

===== GRADIENT CHANNEL =====  
GPNAM[1] SMSQ10.100  
GPNAM[2] SMSQ10.100  
GPNAM[3] SMSQ10.100  
GPNAM[4] SMSQ10.100  
GPZ1 80.00 %  
GPZ2 20.10 %  
GPZ3 11.00 %  
GPZ4 -5.00 %  
P16 1000.00 usec  
P19 600.00 usec

F1 - Acquisition parameters  
TD 256  
SFO1 100.6228 MHz  
FIDRES 78.755043 Hz  
SW 200.365 ppm  
FnMODE Echo-Antiecho

F2 - Processing parameters  
SI 1024  
SF 400.1300075 MHz  
WDW QSINE  
SSB 2  
LB 0 Hz  
GB 0  
PC 1.40

F1 - Processing parameters  
SI 1024  
MC2 echo-antiecho  
SF 100.6126294 MHz  
WDW QSINE  
SSB 2  
LB 0 Hz  
GB 0

Figure S4. COSY NMR spectrum of 1 in MeOH-d4.



Current Data Parameters  
NAME HB2-10 M 10mg  
EXPNO 5  
PROCNO 1

F2 - Acquisition Parameters  
Date\_ 20200813  
Time 23.47  
INSTRUM spect  
PROBHD 5 mm PABBO BB-  
PULPROG cosygpmfzf  
TD 2048  
SOLVENT MeOD  
NS 8  
DS 8  
SWH 3201.024 Hz  
FIDRES 1.563000 Hz  
AQ 0.3198976 sec  
RG 203  
DW 156.200 usec  
DE 6.50 usec  
TE 296.2 K  
D0 0.00000300 sec  
D1 2.00000000 sec  
D13 0.00000400 sec  
D16 0.00020000 sec  
INO 0.00031240 sec

===== CHANNEL f1 =====  
SF01 400.1316005 MHz  
NUC1 1H  
P1 13.90 usec  
PLW1 12.14299965 W

===== GRADIENT CHANNEL =====  
GPNAM[1] SMSQ10.100  
GPNAM[2] SMSQ10.100  
GPNAM[3] SMSQ10.100  
GPZ1 16.00 %  
GPZ2 12.00 %  
GPZ3 40.00 %  
P16 1000.00 usec

F1 - Acquisition parameters  
TD 128  
SF01 400.1316 MHz  
FIDRES 25.008003 Hz  
SW 8.000 ppm  
FnMODE QF

F2 - Processing parameters  
SI 1024  
SF 400.1300117 MHz  
WDW SINE  
SSB 0  
LB 0 Hz  
GB 0  
PC 1.40

F1 - Processing parameters  
SI 1024  
MC2 QF  
SF 400.1300117 MHz  
WDW SINE  
SSB 0  
LB 0 Hz  
GB 0

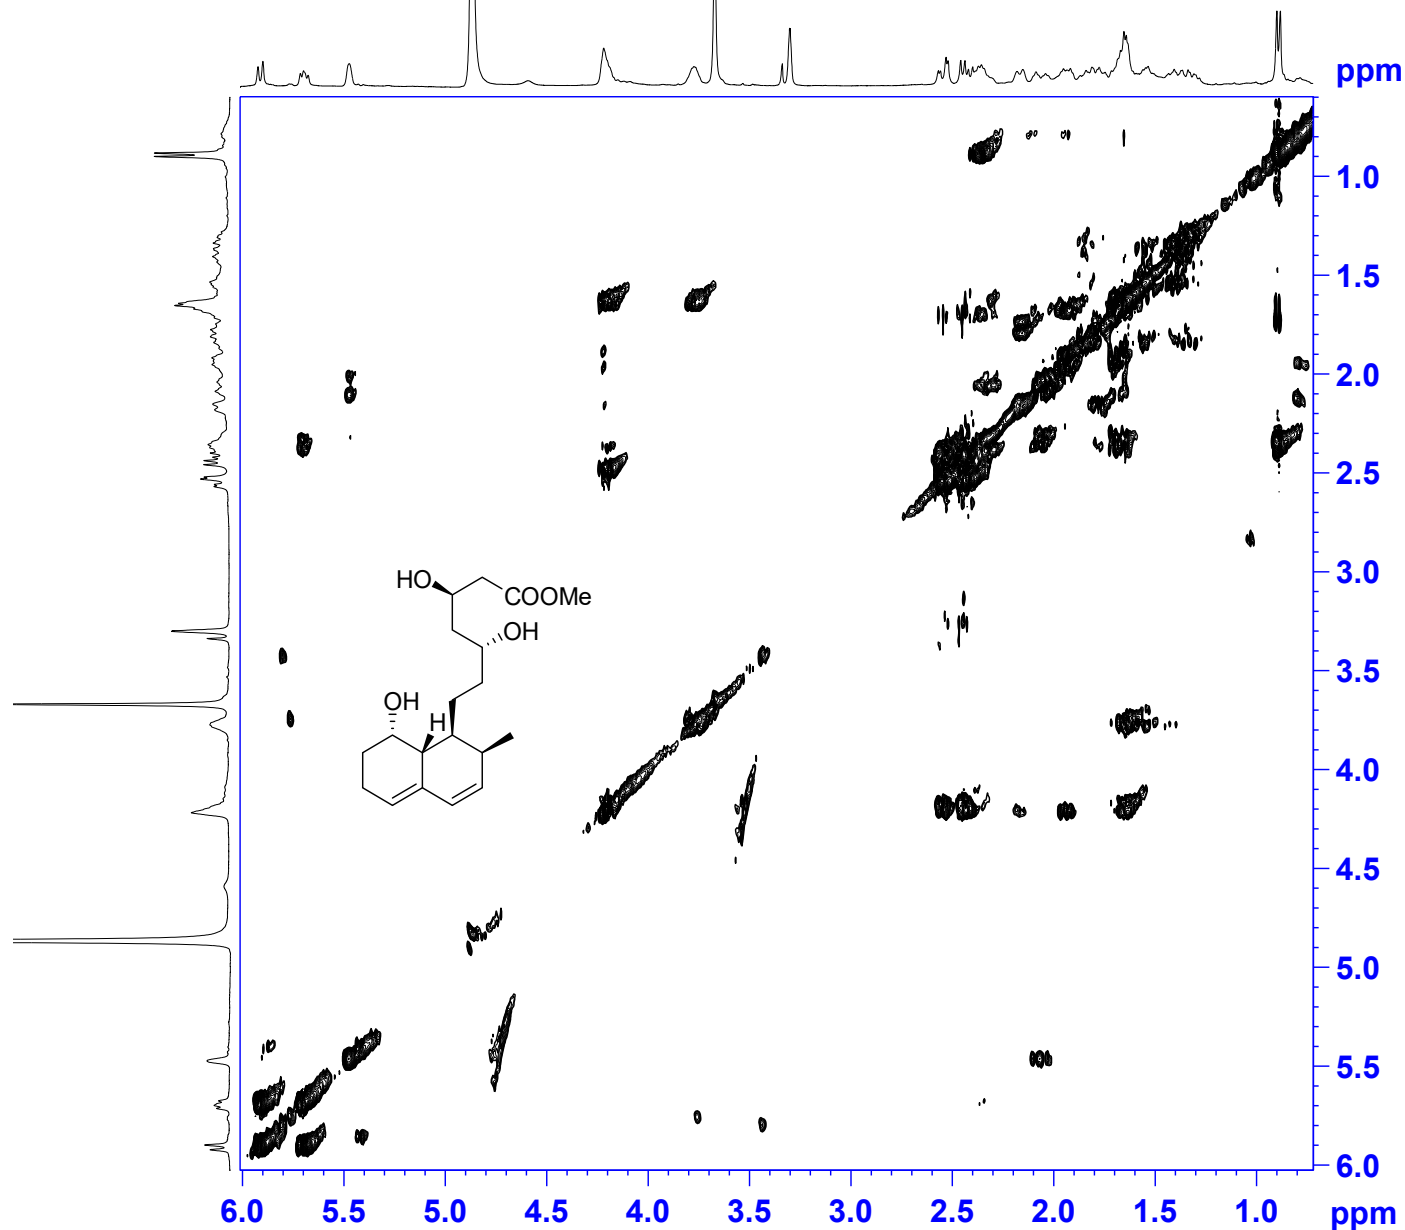

Figure S5. HMBC NMR spectrum of 1 in MeOH-d<sub>4</sub>

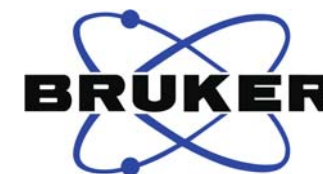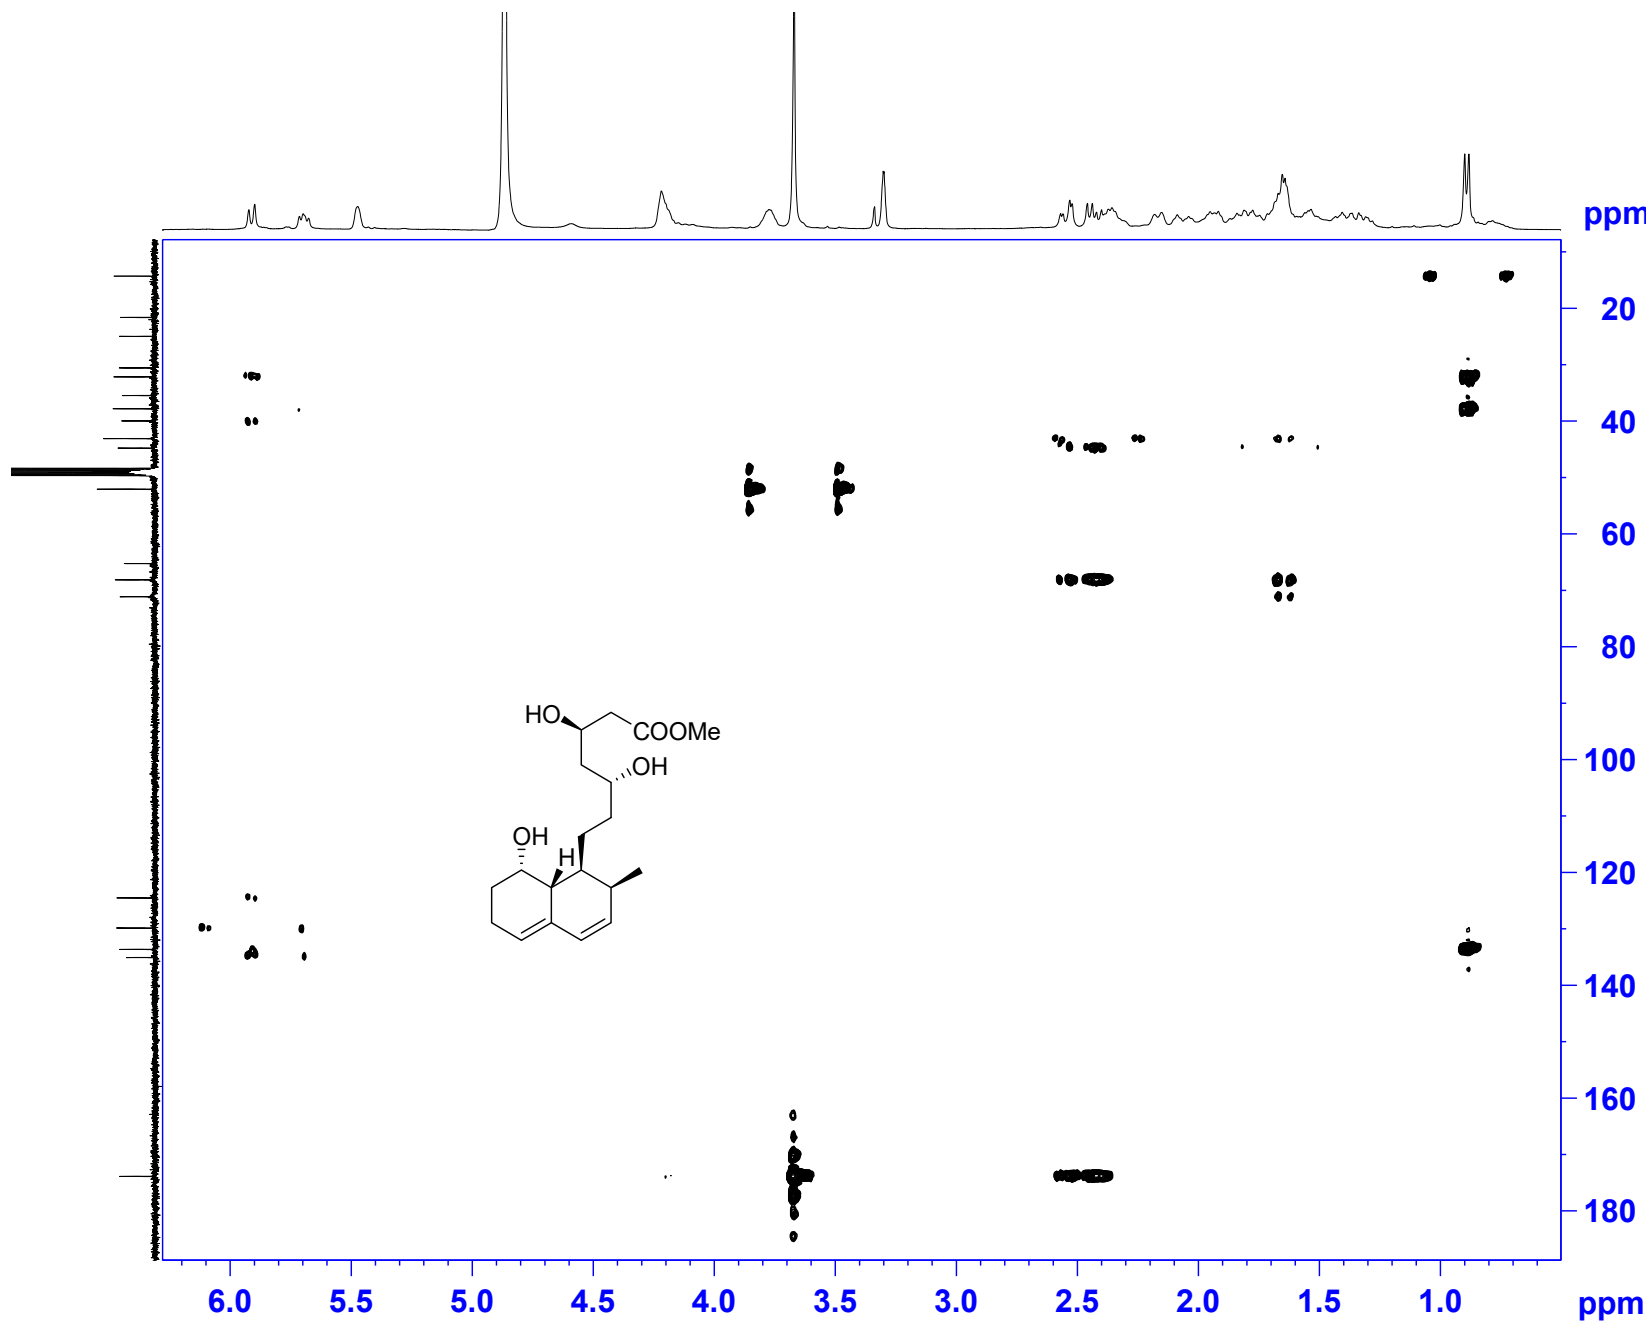

Current Data Parameters  
 NAME HB2-10 M 10mg  
 EXPNO 6  
 PROCNO 1

F2 - Acquisition Parameters  
 Date\_ 20200814  
 Time 0.29  
 INSTRUM spect  
 PROBHD 5 mm PABBO BB-  
 PULPROG hmbcgpndqf  
 TD 4096  
 SOLVENT MeOD  
 NS 48  
 DS 16  
 SWH 3201.024 Hz  
 FIDRES 0.781500 Hz  
 AQ 0.6397952 sec  
 RG 203  
 DW 156.200 usec  
 DE 6.50 usec  
 TE 295.9 K  
 CNST13 8.0000000  
 D0 0.00000300 sec  
 D1 1.50000000 sec  
 D6 0.06250000 sec  
 D16 0.00020000 sec  
 IN0 0.00002480 sec

===== CHANNEL f1 =====  
 SFO1 400.1316005 MHz  
 NUC1 1H  
 P1 13.90 usec  
 P2 27.80 usec  
 PLW1 12.14299965 W

===== CHANNEL f2 =====  
 SFO2 100.6228298 MHz  
 NUC2 13C  
 P3 12.37 usec  
 PLW2 28.13500023 W

===== GRADIENT CHANNEL =====  
 GPNAM[1] SMSQ10.100  
 GPNAM[2] SMSQ10.100  
 GPNAM[3] SMSQ10.100  
 GPZ1 50.00 %  
 GPZ2 30.00 %  
 GPZ3 40.10 %  
 P16 1000.00 usec

F1 - Acquisition parameters  
 TD 128  
 SFO1 100.6228 MHz  
 FIDRES 157.510086 Hz  
 SW 200.365 ppm  
 FnmODE QF

F2 - Processing parameters  
 SI 1024  
 SF 400.1300117 MHz  
 WDW SINE  
 SSB 0  
 LB 0 Hz  
 GB 0  
 PC 1.40

F1 - Processing parameters  
 SI 1024  
 MC2 QF  
 SF 100.6126294 MHz  
 WDW SINE  
 SSB 0  
 LB 0 Hz  
 GB 0

Figure S6. NOESY NMR spectrum of 1 in MeOH-d<sub>4</sub>



Current Data Parameters  
 NAME HB2-10 M 10mg  
 EXPNO 7  
 PROCNO 1

F2 - Acquisition Parameters  
 Date\_ 20200814  
 Time\_ 4.16  
 INSTRUM spect  
 PROBD 5 mm PABBO BB-  
 PULPROG noesygpph  
 TD 2048  
 SOLVENT MeOD  
 NS 12  
 DS 32  
 SWH 3201.024 Hz  
 FIDRES 1.563000 Hz  
 AQ 0.3198976 sec  
 RG 203  
 DW 156.200 usec  
 DE 6.50 usec  
 TE 295.9 K  
 D0 0.00013850 sec  
 D1 2.00000000 sec  
 D8 0.30000001 sec  
 D11 0.03000000 sec  
 D12 0.00002000 sec  
 D16 0.00020000 sec  
 INO 0.00031240 sec

===== CHANNEL f1 =====  
 SFO1 400.1316005 MHz  
 NUC1 1H  
 P1 13.90 usec  
 P2 27.80 usec  
 P17 2500.00 usec  
 PLW1 12.14299965 W  
 PLW10 3.47059989 W

===== GRADIENT CHANNEL =====  
 GPNAM[1] SMSQ10.100  
 GPZ1 40.00 %  
 P16 1000.00 usec

F1 - Acquisition parameters  
 TD 256  
 SFO1 400.1316 MHz  
 FIDRES 12.504002 Hz  
 SW 8.000 ppm  
 FnmODE States-TPPI

F2 - Processing parameters  
 SI 1024  
 SF 400.1300117 MHz  
 WDW QSINE  
 SSB 2  
 LB 0 Hz  
 GB 0  
 PC 1.00

F1 - Processing parameters  
 SI 1024  
 MC2 States-TPPI  
 SF 400.1300117 MHz  
 WDW QSINE  
 SSB 2  
 LB 0 Hz  
 GB 0

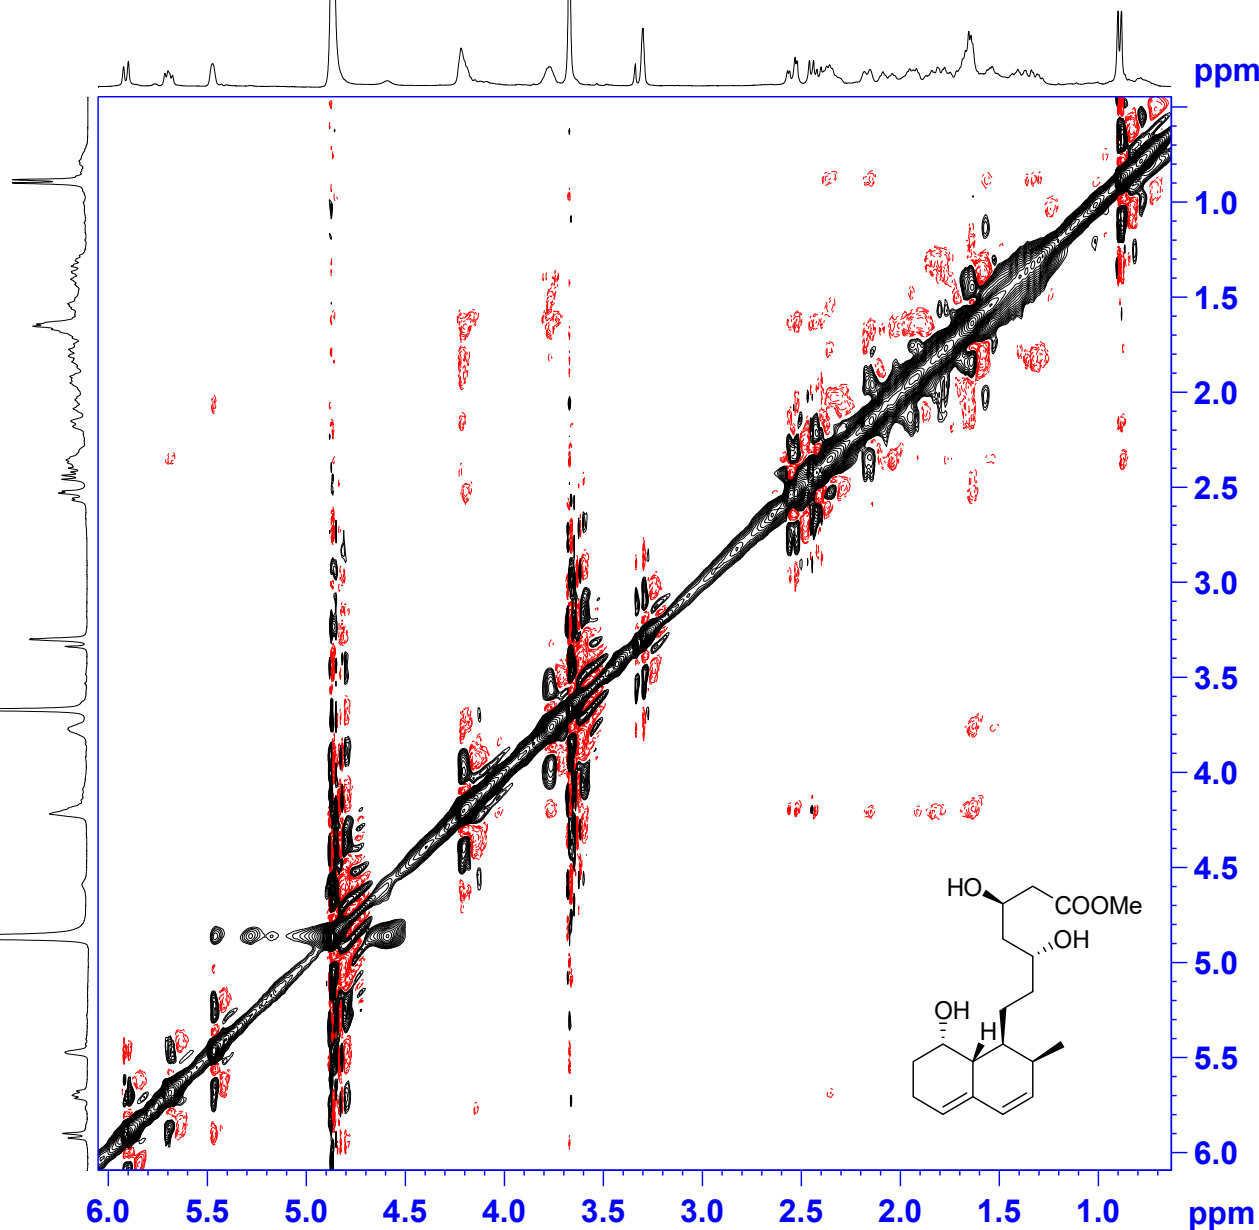



**Single Mass Analysis**

Tolerance = 20.0 mDa / DBE: min = -1.5, max = 50.0

Element prediction: Off

Number of isotope peaks used for i-FIT = 3

Monoisotopic Mass, Even Electron Ions

1726 formula(e) evaluated with 73 results within limits (up to 50 closest results for each mass)

Elements Used:

C: 0-50 H: 0-50 N: 0-50 O: 0-50 <sup>23</sup>Na: 0-1

HB 2-10-Aug 148 (0.580) Cm (126:167)

1: TOF MS ES+

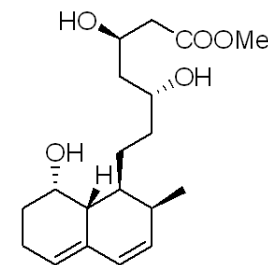

6.07e+006

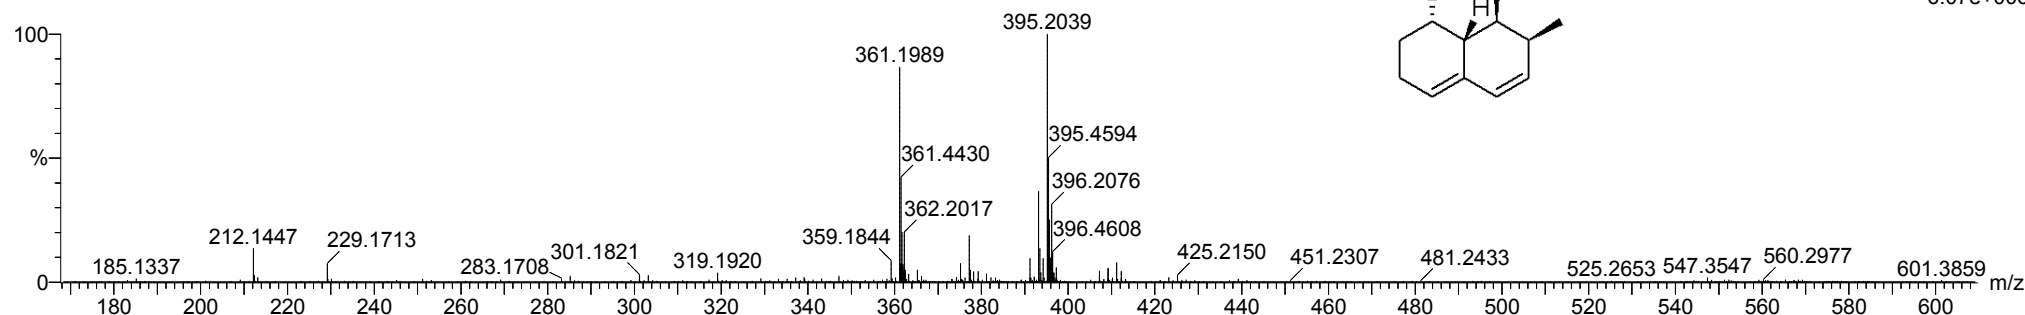

Minimum: -1.5  
Maximum: 20.0 10.0 50.0

| Mass     | Calc. Mass | mDa  | PPM   | DBE  | i-FIT  | Norm   | Conf (%) | Formula                        |
|----------|------------|------|-------|------|--------|--------|----------|--------------------------------|
| 361.1989 | 361.1988   | 0.1  | 0.3   | 8.5  | 1820.9 | 11.424 | 0.00     | C17 H25 N6 O3                  |
|          | 361.1991   | -0.2 | -0.6  | 4.5  | 1819.2 | 9.639  | 0.01     | C19 H30 O5 <sup>23</sup> Na    |
|          | 361.1993   | -0.4 | -1.1  | 1.5  | 1829.6 | 20.052 | 0.00     | C2 H21 N18 O4                  |
|          | 361.1982   | 0.7  | 1.9   | 3.5  | 1832.5 | 22.942 | 0.00     | C H18 N22 <sup>23</sup> Na     |
|          | 361.1975   | 1.4  | 3.9   | 3.5  | 1822.6 | 13.089 | 0.00     | C16 H29 N2 O7                  |
|          | 361.2004   | -1.5 | -4.2  | 9.5  | 1818.9 | 9.344  | 0.01     | C20 H26 N4 O <sup>23</sup> Na  |
|          | 361.2007   | -1.8 | -5.0  | 6.5  | 1831.2 | 21.703 | 0.00     | C3 H17 N22                     |
|          | 361.1969   | 2.0  | 5.5   | -1.5 | 1830.3 | 20.761 | 0.00     | H22 N18 O4 <sup>23</sup> Na    |
|          | 361.2009   | -2.0 | -5.5  | 2.5  | 1829.1 | 19.615 | 0.00     | C5 H22 N16 O2 <sup>23</sup> Na |
|          | 361.1964   | 2.5  | 6.9   | 5.5  | 1823.3 | 13.822 | 0.00     | C15 H26 N6 O3 <sup>23</sup> Na |
|          | 361.2015   | -2.6 | -7.2  | 7.5  | 1809.5 | 0.001  | 99.93    | C21 H29 O5                     |
|          | 361.1961   | 2.8  | 7.8   | 9.5  | 1824.8 | 15.318 | 0.00     | C13 H21 N12 O                  |
|          | 361.2020   | -3.1 | -8.6  | 0.5  | 1827.9 | 18.329 | 0.00     | C6 H25 N12 O6                  |
|          | 361.1956   | 3.3  | 9.1   | 16.5 | 1822.6 | 13.047 | 0.00     | C28 H25                        |
|          | 361.1951   | 3.8  | 10.5  | 0.5  | 1824.4 | 14.914 | 0.00     | C14 H30 N2 O7 <sup>23</sup> Na |
|          | 361.2028   | -3.9 | -10.8 | 12.5 | 1819.6 | 10.036 | 0.00     | C22 H25 N4 O                   |
|          | 361.1948   | 4.1  | 11.4  | 4.5  | 1825.2 | 15.633 | 0.00     | C12 H25 N8 O5                  |
|          | 361.2033   | -4.4 | -12.2 | 5.5  | 1828.2 | 18.671 | 0.00     | C7 H21 N16 O2                  |
|          | 361.2036   | -4.7 | -13.0 | 1.5  | 1827.0 | 17.427 | 0.00     | C9 H26 N10 O4 <sup>23</sup> Na |
|          | 361.1937   | 5.2  | 14.4  | 6.5  | 1826.3 | 16.798 | 0.00     | C11 H22 N12 O <sup>23</sup> Na |
|          | 361.1935   | 5.4  | 15.0  | -0.5 | 1826.0 | 16.509 | 0.00     | C11 H29 N4 O9                  |
|          | 361.1932   | 5.7  | 15.8  | 13.5 | 1821.2 | 11.701 | 0.00     | C26 H26 <sup>23</sup> Na       |
|          | 361.2047   | -5.8 | -16.1 | -0.5 | 1826.4 | 16.867 | 0.00     | C10 H29 N6 O8                  |
|          | 361.2050   | -6.1 | -16.9 | 6.5  | 1827.2 | 17.710 | 0.00     | C10 H22 N14 <sup>23</sup> Na   |
|          | 361.1924   | 6.5  | 18.0  | 1.5  | 1826.4 | 16.889 | 0.00     | C10 H26 N8 O5 <sup>23</sup> Na |
|          | 361.1921   | 6.8  | 18.8  | 5.5  | 1827.5 | 17.930 | 0.00     | C8 H21 N14 O3                  |
|          | 361.2060   | -7.1 | -19.7 | 4.5  | 1825.8 | 16.301 | 0.00     | C11 H25 N10 O4                 |

Figure S8. <sup>1</sup>H NMR spectrum of 2 in DMSO-d<sub>6</sub>.

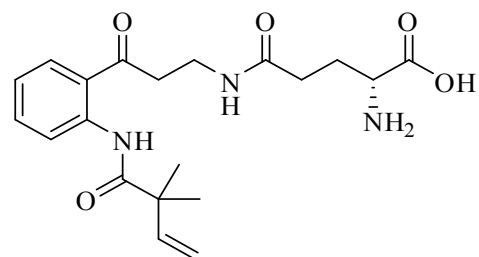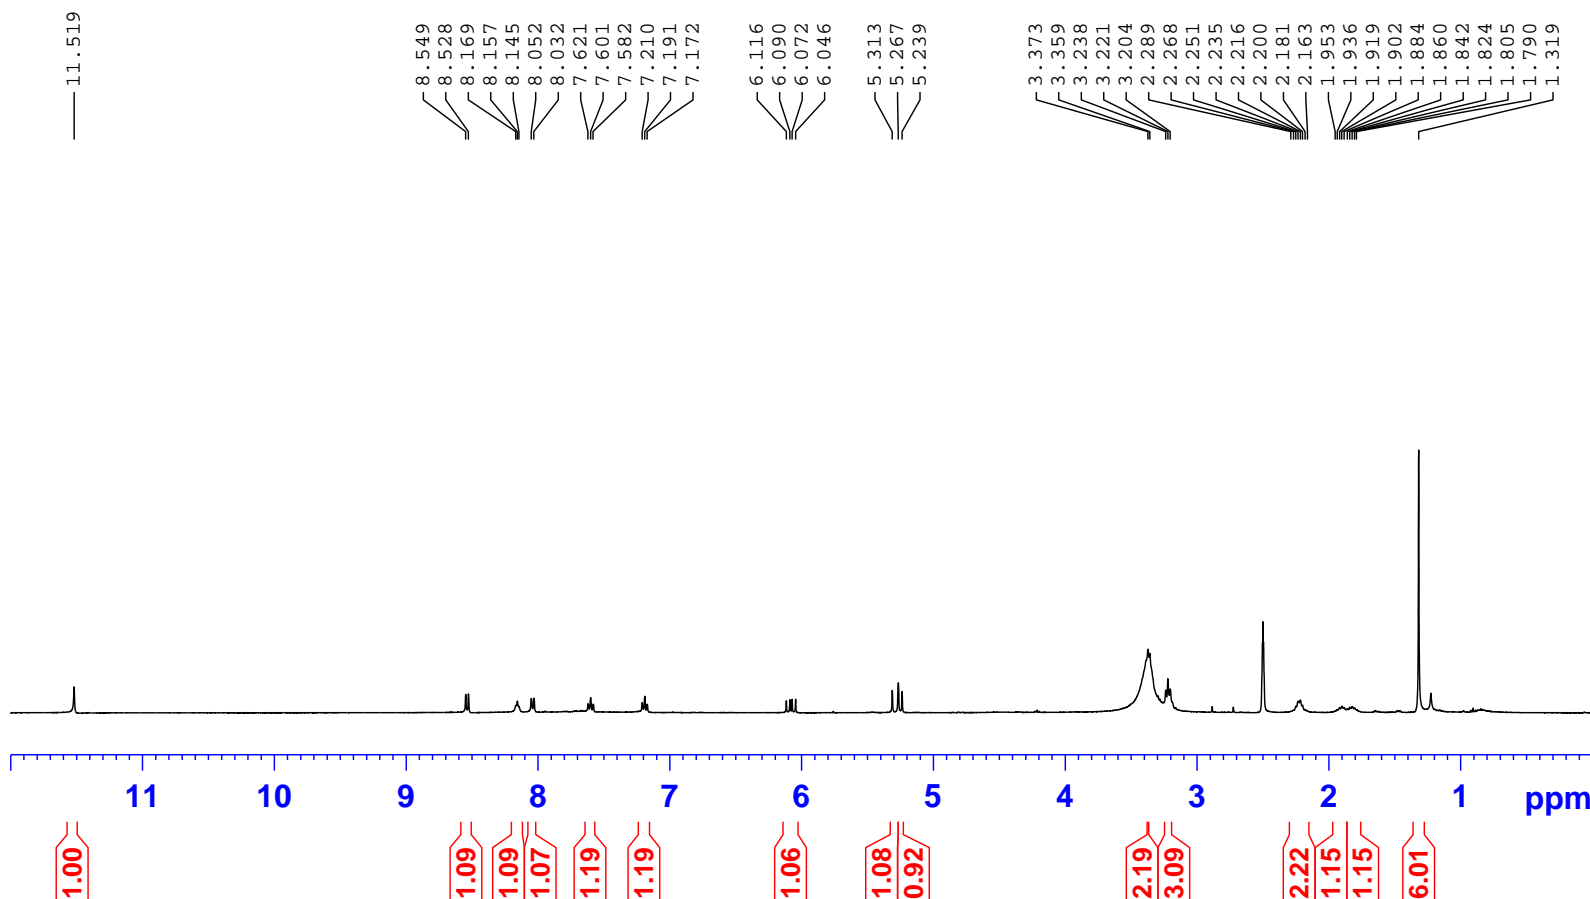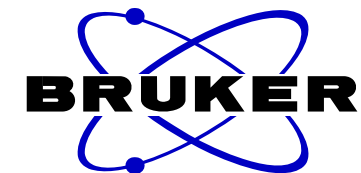

```

NAME          HB4-6 D 5mg
EXPNO          1
PROCNO         1
Date_          20200108
Time           9.18
INSTRUM        spect
PROBHD         5 mm PABBO BB-
PULPROG        zg30
TD             65536
SOLVENT        DMSO
NS             28
DS             2
SWH            8012.820 Hz
FIDRES         0.122266 Hz
AQ            4.0894966 sec
RG            203
DW            62.400 usec
DE            6.50 usec
TE            292.5 K
D1            1.00000000 sec
TD0           1
  
```

```

===== CHANNEL f1 =====
SF01          400.1324710 MHz
NUC1           1H
P1            13.90 usec
SI            32768
SF            400.1300029 MHz
WDW            EM
SSB            0
LB            0.30 Hz
GB            0
PC            1.00
  
```

Figure S9.  $^{13}\text{C}$  NMR spectrum of 2 in DMSO- $d_6$ .

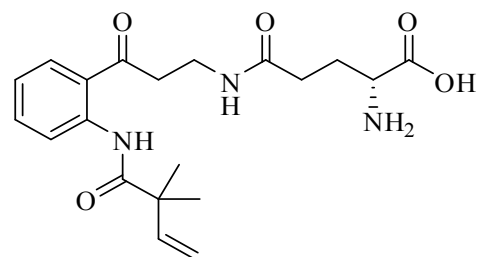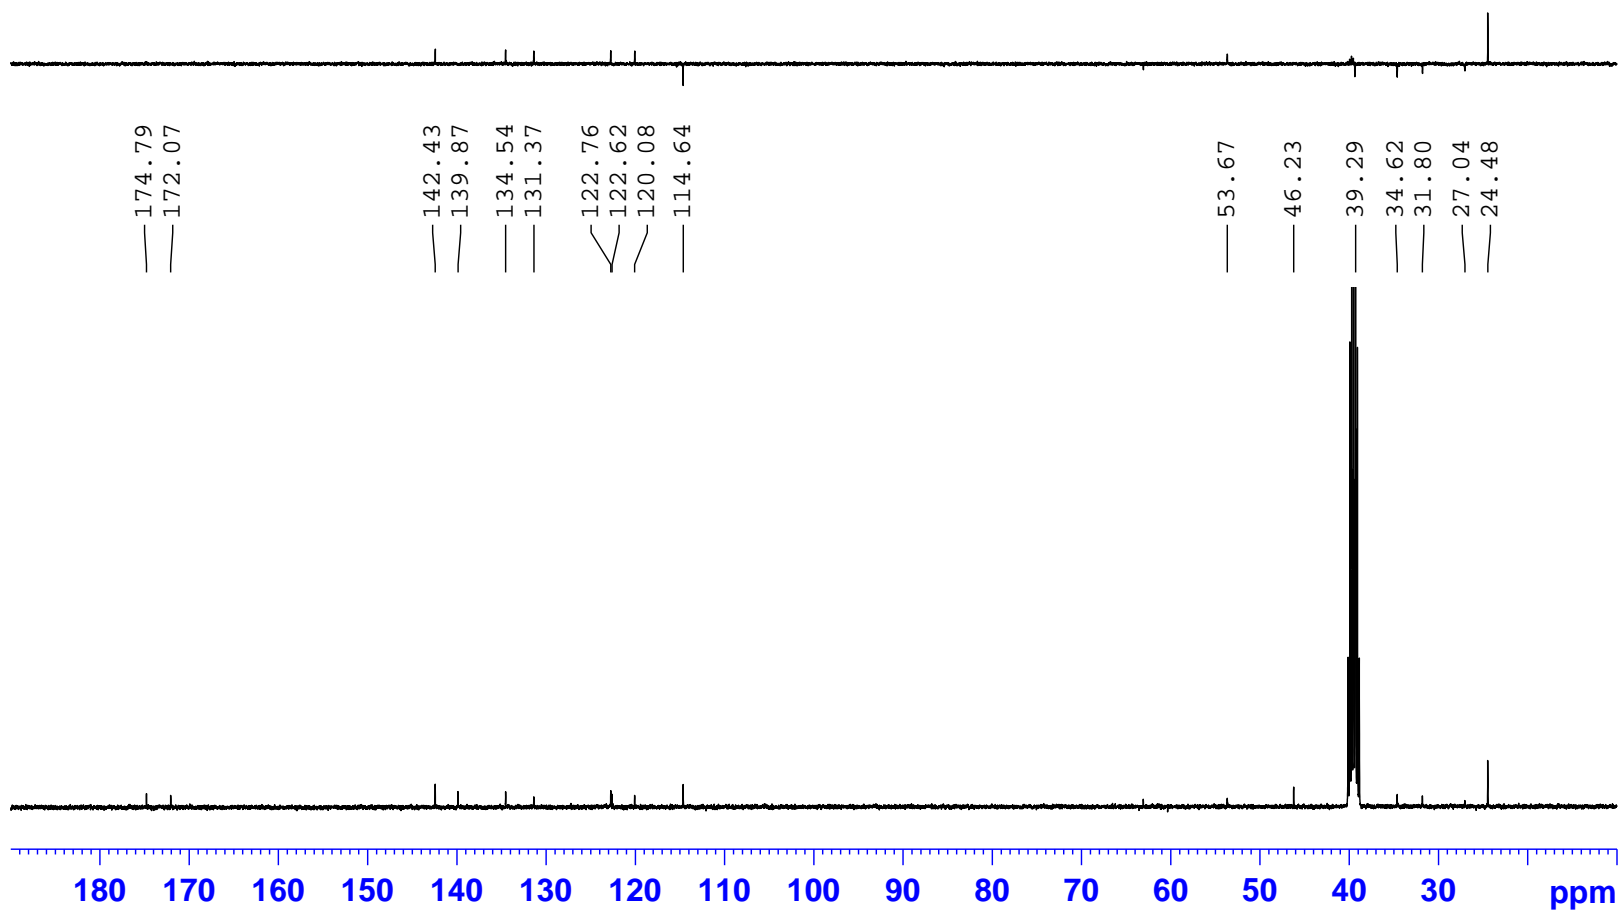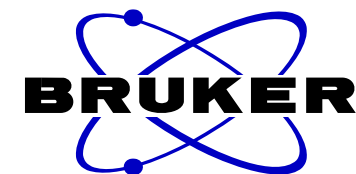

NAME HB4-6 D 5mg  
 EXPNO 2  
 PROCNO 1  
 Date\_ 20200108  
 Time 9.23  
 INSTRUM spect  
 PROBHD 5 mm PABBO BB-  
 PULPROG zgpg30  
 TD 65536  
 SOLVENT DMSO  
 NS 1229  
 DS 4  
 SWH 24038.461 Hz  
 FIDRES 0.366798 Hz  
 AQ 1.3631988 sec  
 RG 203  
 DW 20.800 usec  
 DE 6.50 usec  
 TE 292.6 K  
 D1 2.00000000 sec  
 D11 0.03000000 sec  
 TD0 1

===== CHANNEL f1 =====  
 SF01 100.6228293 MHz  
 NUC1  $^{13}\text{C}$   
 P1 12.37 usec  
 SI 32768  
 SF 100.6128134 MHz  
 WDW EM  
 SSB 0  
 LB 1.00 Hz  
 GB 0  
 PC 1.40

Figure S10. HSQC NMR spectrum of 2 in DMSO-d<sub>6</sub>.

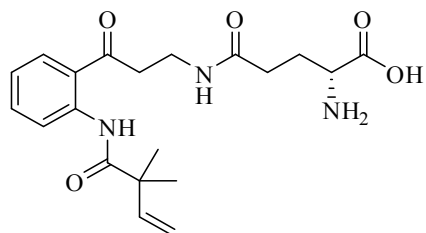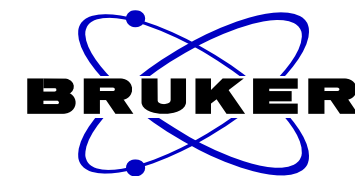

NAME HB4-6 D 5mg  
 EXPNO 4  
 PROCNO 1  
 Date\_ 20200111  
 Time 18.48  
 INSTRUM spect  
 PROBHD 5 mm PABBO BB-  
 PULPROG hsqcetgpsisp2.2  
 TD 1024  
 SOLVENT DMSO  
 NS 8  
 DS 32  
 SWH 5197.505 Hz  
 FIDRES 5.075689 Hz  
 AQ 0.0985588 sec  
 RG 203  
 DW 96.200 usec  
 DE 6.50 usec  
 TE 294.1 K  
 CNST2 145.000000  
 CNST17 -0.500000  
 D0 0.00000300 sec  
 D1 2.00000000 sec  
 D4 0.00172414 sec  
 D11 0.03000000 sec  
 D16 0.00020000 sec  
 D24 0.00089000 sec  
 IN0 0.00002260 sec

===== CHANNEL f1 =====  
 SFO1 400.1326008 MHz  
 NUC1 1H  
 P1 13.90 usec  
 P2 27.80 usec  
 P28 1000.00 usec  
 ND0 2  
 TD 256  
 SFO1 100.6238 MHz  
 FIDRES 86.421463 Hz  
 SW 219.867 ppm  
 FnmODE Echo-Antiecho  
 SI 1024  
 SF 400.1299999 MHz  
 WDW QSINE  
 SSB 2  
 LB 0.00 Hz  
 GB 0  
 PC 1.40  
 SI 1024  
 MC2 echo-antiecho  
 SF 100.6128137 MHz  
 WDW QSINE  
 SSB 2  
 LB 0.00 Hz  
 GB 0

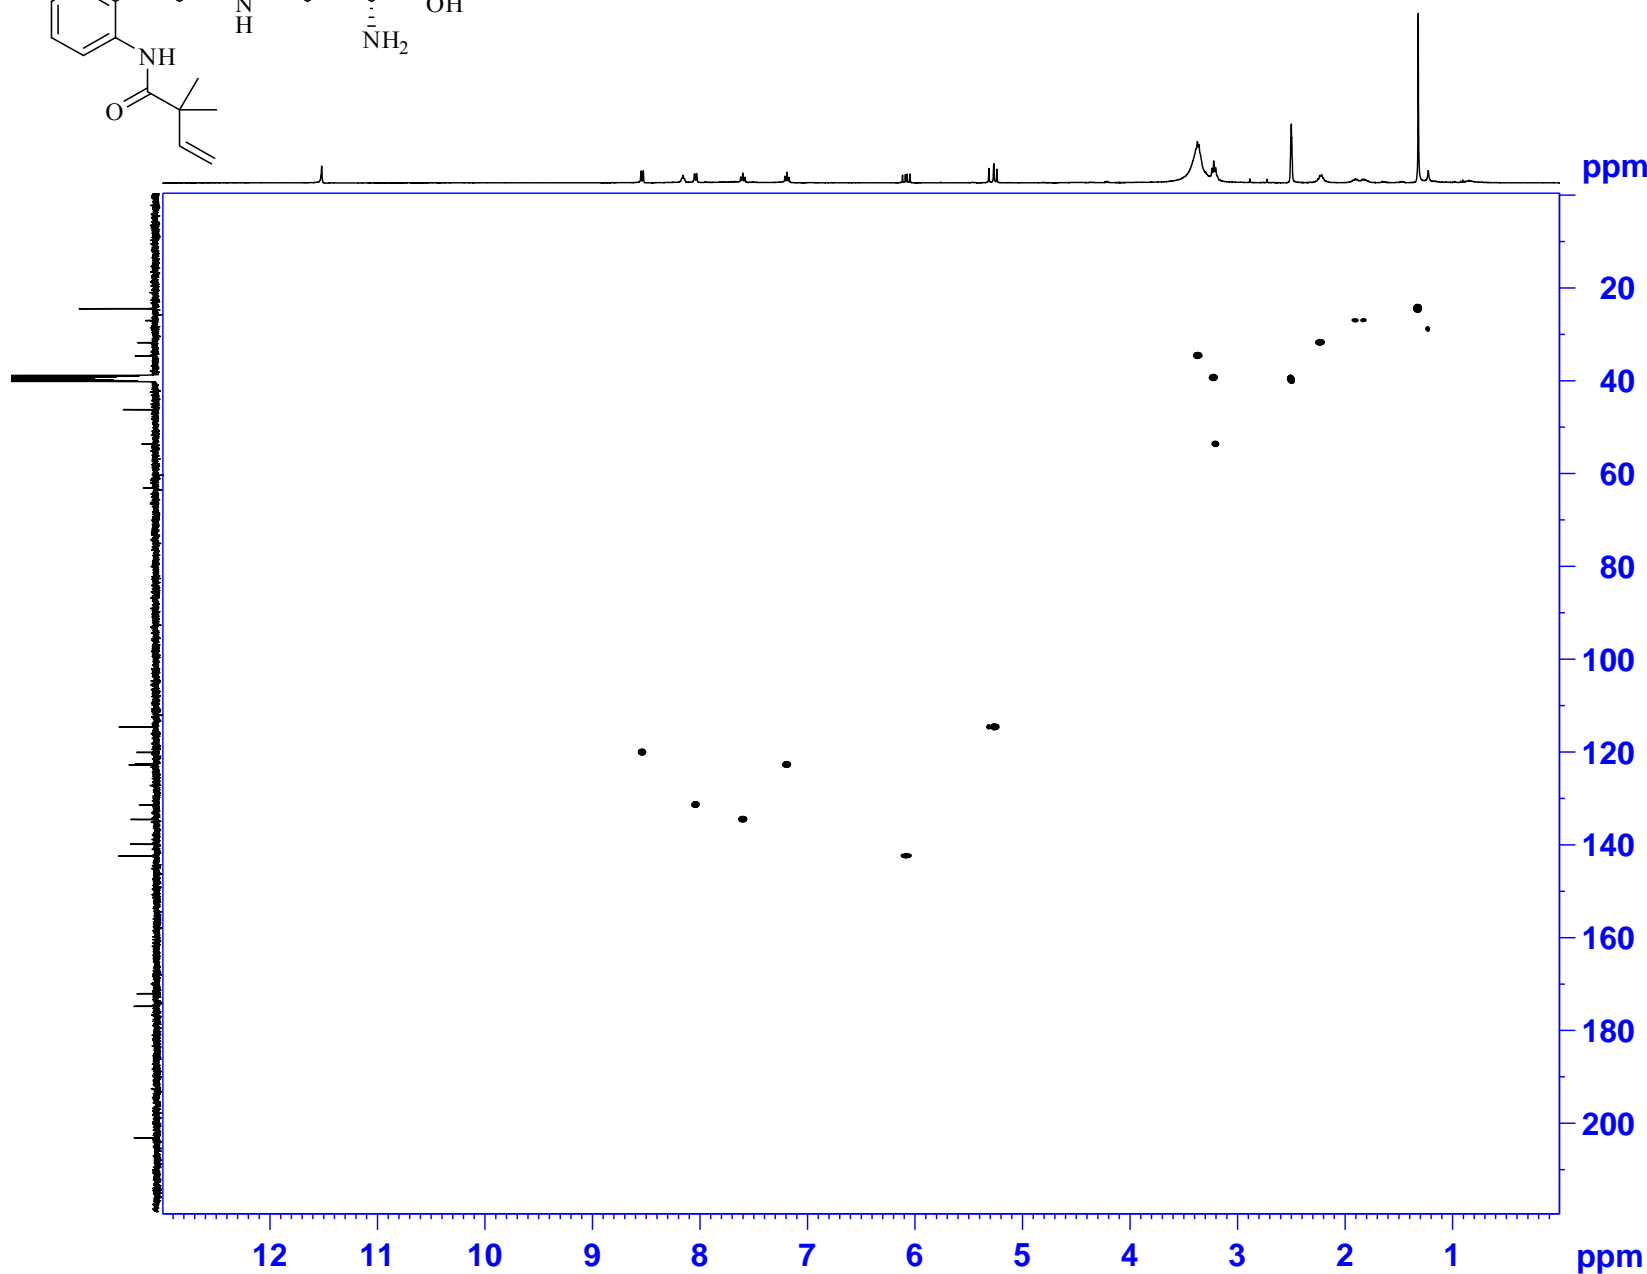

Figure S11. COSY NMR spectrum of 2 in DMSO-d6.

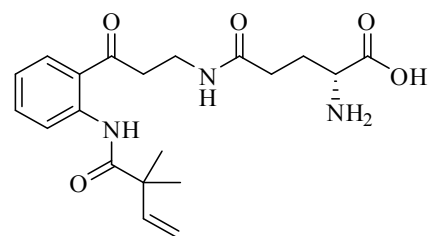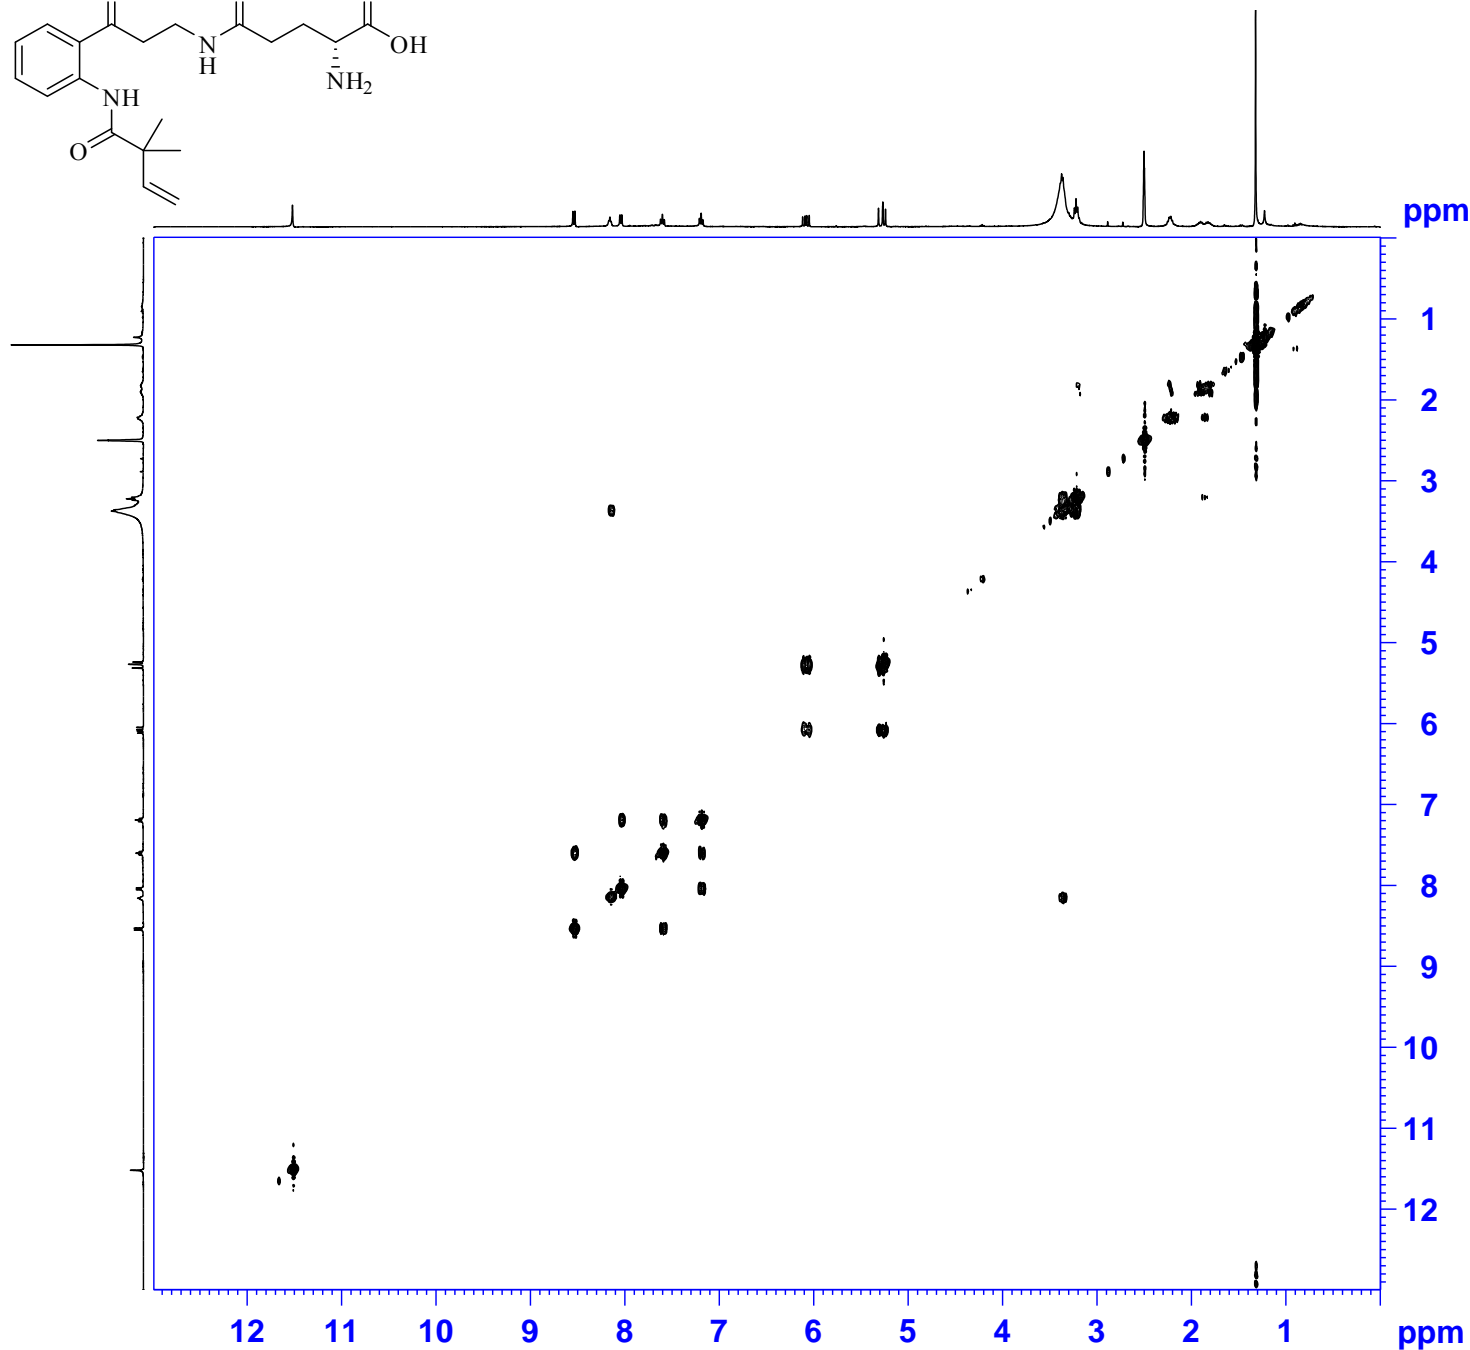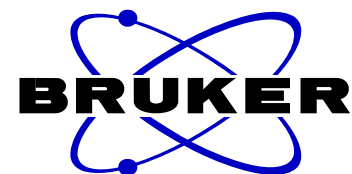

NAME HB4-6 D 5mg  
 EXPNO 5  
 PROCNO 1  
 Date\_ 20200111  
 Time 10.19  
 INSTRUM spect  
 PROBHD 5 mm PABBO BB-  
 PULPROG cosygpgf  
 TD 2048  
 SOLVENT DMSO  
 NS 16  
 DS 8  
 SWH 5197.505 Hz  
 FIDRES 2.537844 Hz  
 AQ 0.1970676 sec  
 RG 203  
 DW 96.200 usec  
 DE 6.50 usec  
 TE 293.8 K  
 D0 0.00000300 sec  
 D1 1.50000000 sec  
 D13 0.00000400 sec  
 D16 0.00020000 sec  
 IN0 0.00019220 sec

===== CHANNEL f1 =====  
 SF01 400.1326008 MHz  
 NUC1 1H  
 P0 13.90 usec  
 P1 13.90 usec  
 ND0 1  
 TD 128  
 SF01 400.1326 MHz  
 FIDRES 40.647762 Hz  
 SW 13.003 ppm  
 FnMODE QF  
 SI 1024  
 SF 400.1300030 MHz  
 WDW SINE  
 SSB 0  
 LB 0.00 Hz  
 GB 0  
 PC 1.40  
 SI 1024  
 MC2 QF  
 SF 400.1300030 MHz  
 WDW SINE  
 SSB 0  
 LB 0.00 Hz  
 GB 0

Figure S12. HMBC NMR spectrum of 2 in DMSO-d<sub>6</sub>.

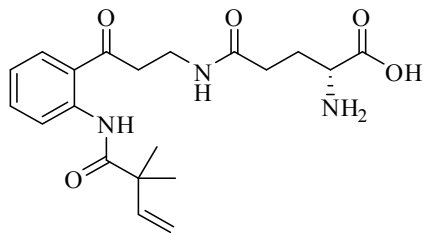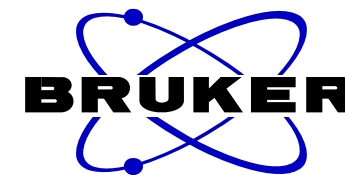

NAME HB4-6 D 5mg  
 EXPNO 6  
 PROCNO 1  
 Date\_ 20200111  
 Time 11.20  
 INSTRUM spect  
 PROBHD 5 mm PABBO BB-  
 PULPROG hmbcgpndqf  
 TD 4096  
 SOLVENT DMSO  
 NS 64  
 DS 16  
 SWH 5197.505 Hz  
 FIDRES 1.268922 Hz  
 AQ 0.3940852 sec  
 RG 203  
 DW 96.200 usec  
 DE 6.50 usec  
 TE 293.8 K  
 CNST13 8.0000000  
 D0 0.00000300 sec  
 D1 1.50000000 sec  
 D6 0.06250000 sec  
 D16 0.00020000 sec  
 IN0 0.00002260 sec

===== CHANNEL f1 =====  
 SFO1 400.1326008 MHz  
 NUC1 1H  
 P1 13.90 usec  
 P2 27.80 usec  
 ND0 2  
 TD 128  
 SFO1 100.6238 MHz  
 FIDRES 172.842926 Hz  
 SW 219.867 ppm  
 FnMODE QF  
 SI 1024  
 SF 400.1300030 MHz  
 WDW SINE  
 SSB 0  
 LB 0.00 Hz  
 GB 0  
 PC 1.40  
 SI 1024  
 MC2 QF  
 SF 100.6128137 MHz  
 WDW SINE  
 SSB 0  
 LB 0.00 Hz  
 GB 0

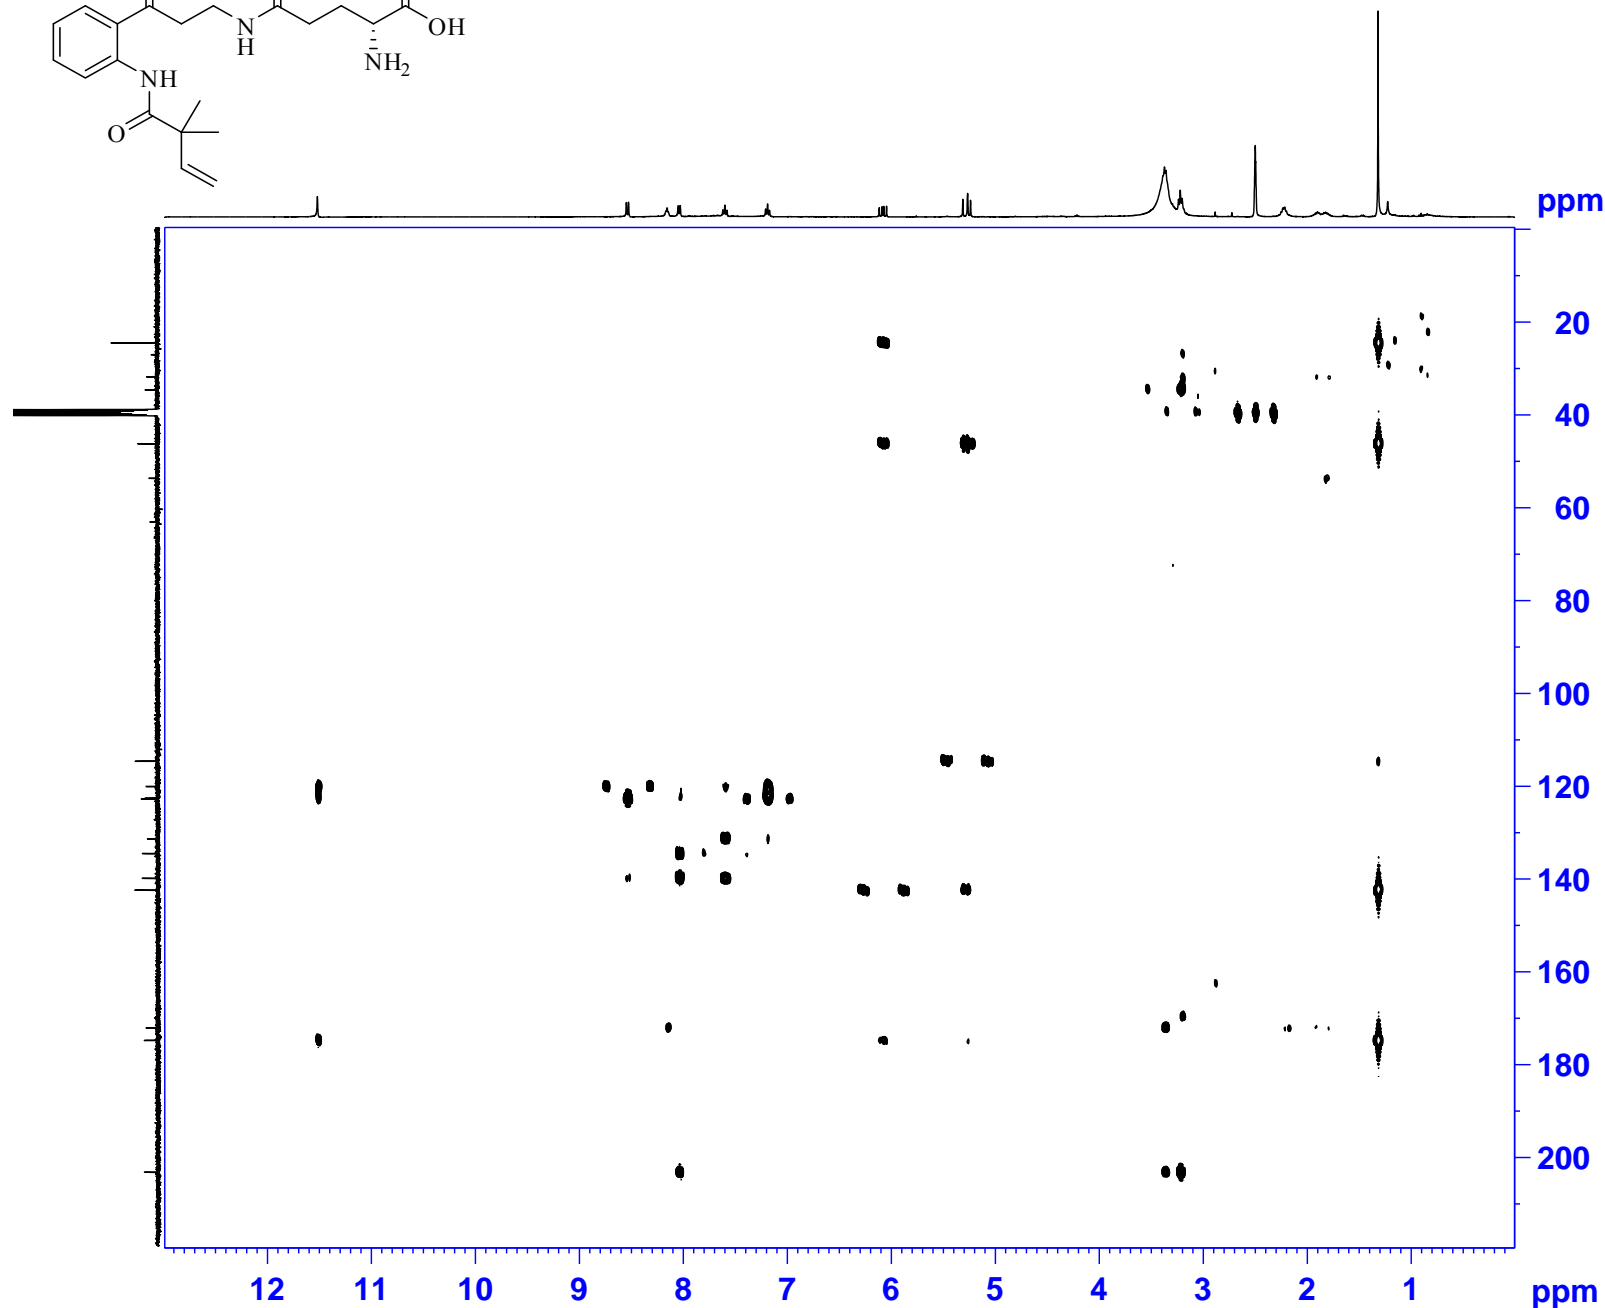

Figure S13. NOESY NMR spectrum of 2 in DMSO-d<sub>6</sub>.

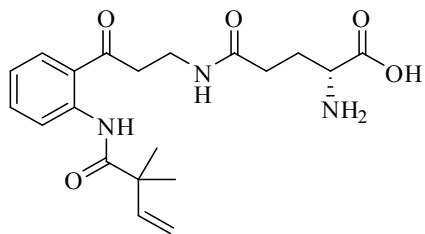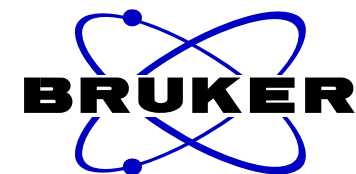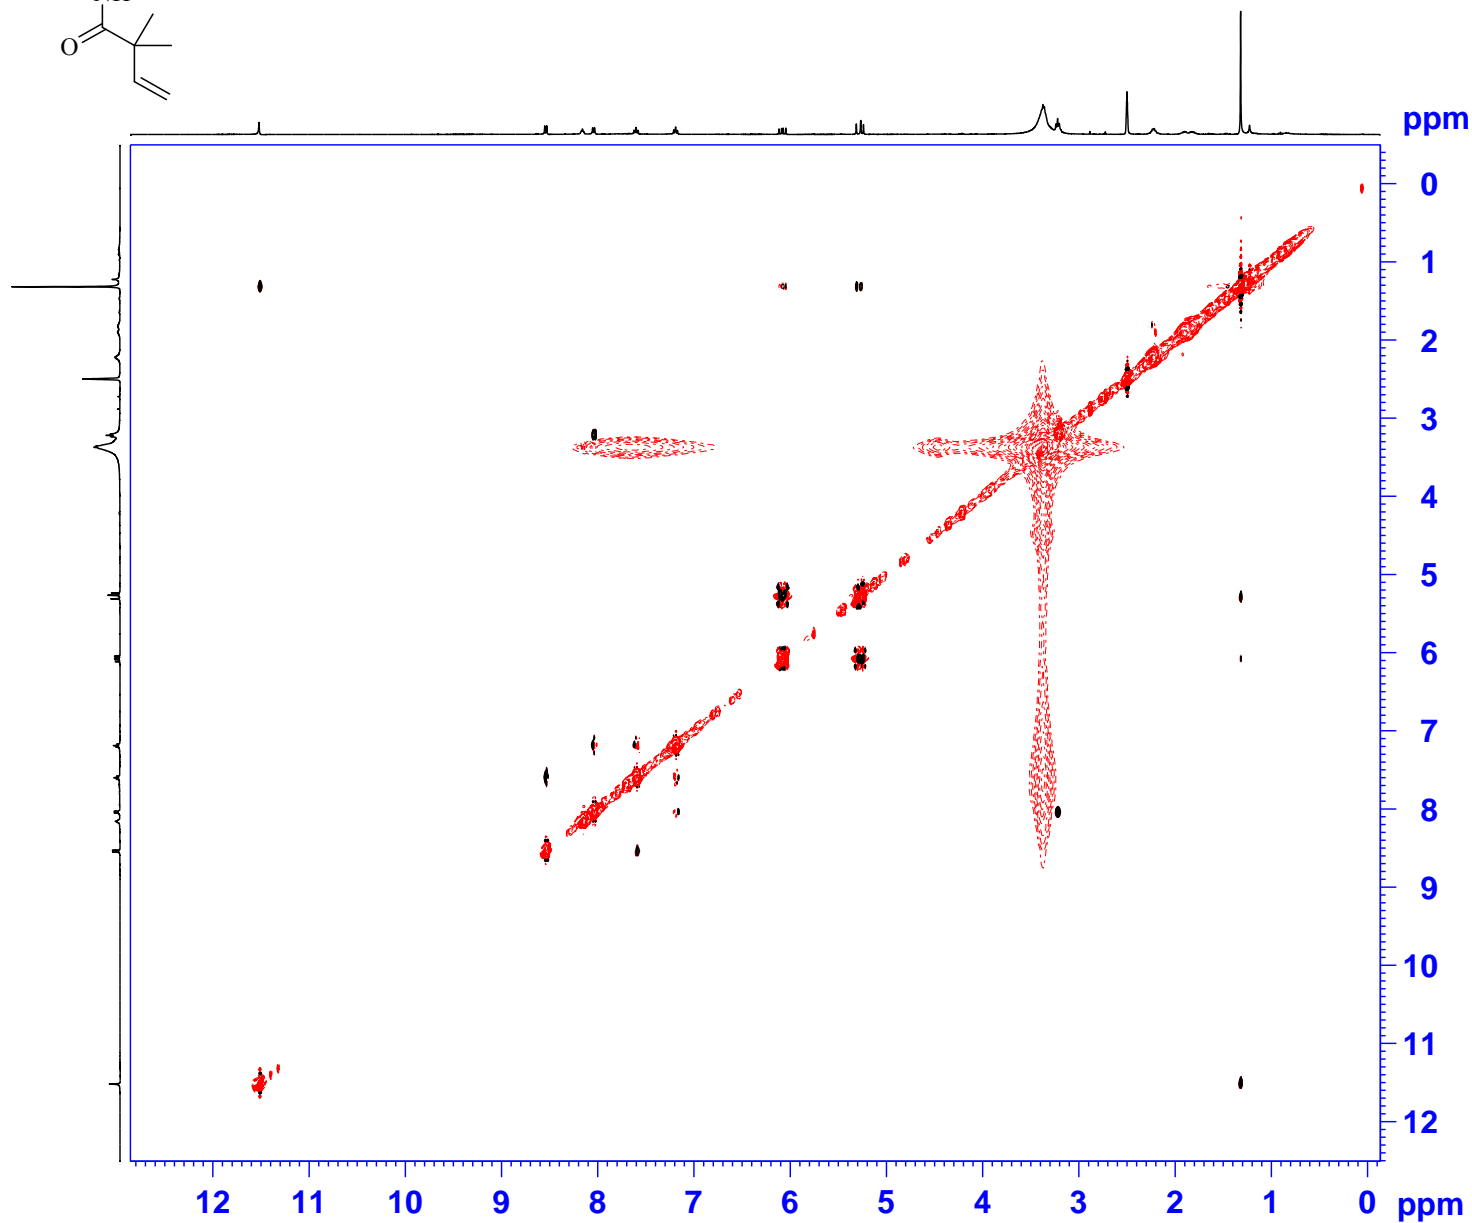

```

NAME           HB4-6 D 5mg
EXPNO           7
PROCNO          1
Date_           20200111
Time            15.49
INSTRUM         spect
PROBHD          5 mm PABBO BB-
PULPROG         noesygpphpp
TD              2048
SOLVENT         DMSO
NS               16
DS               32
SWH              5197.505 Hz
FIDRES          2.537844 Hz
AQ              0.1970676 sec
RG               203
DW              96.200 usec
DE               6.50 usec
TE              294.0 K
D0              0.00007840 sec
D1              2.00000000 sec
D8              0.30000001 sec
D11             0.03000000 sec
D12             0.00002000 sec
D16             0.00020000 sec
IN0             0.00019220 sec
  
```

```

===== CHANNEL f1 =====
SFO1           400.1326008 MHz
NUC1            1H
P1              13.90 usec
P2              27.80 usec
P17            2500.00 usec
ND0             1
TD              256
SFO1           400.1326 MHz
FIDRES          20.323881 Hz
SW              13.003 ppm
FnMODE          States-TPPI
SI              1024
SF             400.1300030 MHz
WDW             QSINE
SSB             2
LB              0.00 Hz
GB              0
PC              1.00
SI              1024
MC2            States-TPPI
SF             400.1300030 MHz
WDW             QSINE
SSB             2
LB              0.00 Hz
GB              0
  
```

**Figure S14. The HR-ESI-MS spectrum of 2.**

**Single Mass Analysis**

Tolerance = 10.0 PPM / DBE: min = -1.5, max = 50.0

Element prediction: Off

Number of isotope peaks used for i-FIT = 3

Monoisotopic Mass, Even Electron Ions

626 formula(e) evaluated with 2 results within limits (up to 50 closest results for each mass)

Elements Used:

C: 10-20 H: 1-100 N: 0-20 O: 0-30

HB 4-7-N 105 (0.415)

1: TOF MS ES-

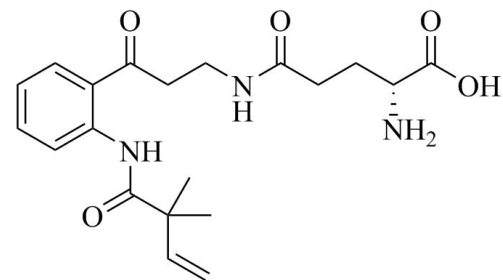

Chemical Formula: C<sub>20</sub>H<sub>27</sub>N<sub>3</sub>O<sub>5</sub>

Molecular Weight: 389.4520

7.62e+004

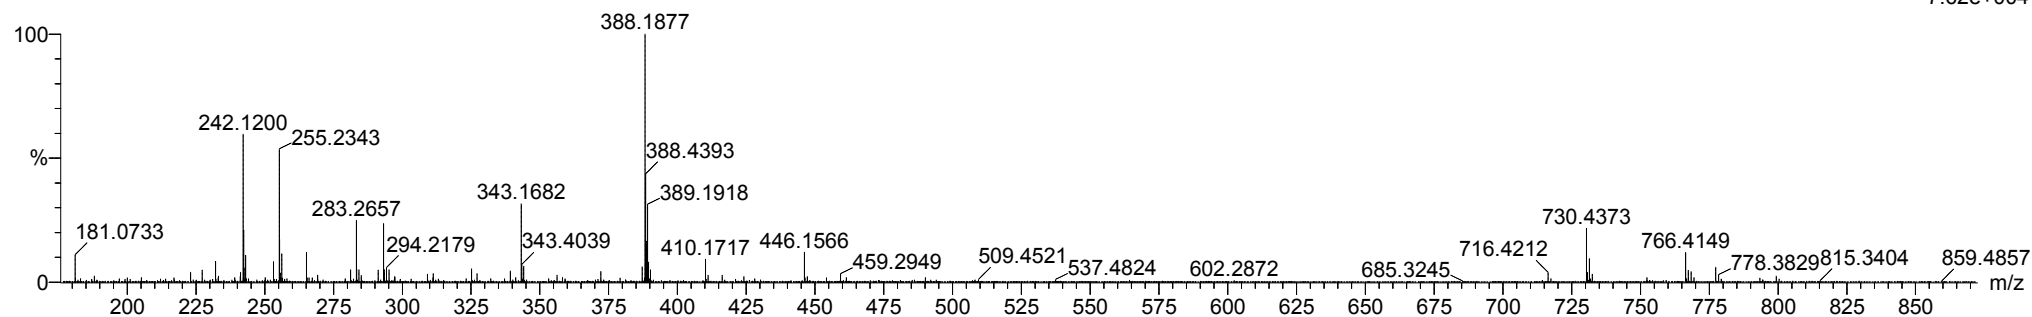

Minimum: -1.5

Maximum: 50.0 10.0 50.0

| Mass     | Calc. Mass | mDa | PPM | DBE  | i-FIT | Norm  | Conf(%) | Formula       |
|----------|------------|-----|-----|------|-------|-------|---------|---------------|
| 388.1877 | 388.1872   | 0.5 | 1.3 | 9.5  | 565.4 | 0.012 | 98.81   | C20 H26 N3 O5 |
|          | 388.1846   | 3.1 | 8.0 | 10.5 | 569.8 | 4.427 | 1.19    | C16 H22 N9 O3 |



Figure S15. <sup>1</sup>H NMR spectrum of 3 in MeOH-d<sub>4</sub>

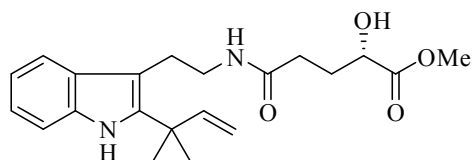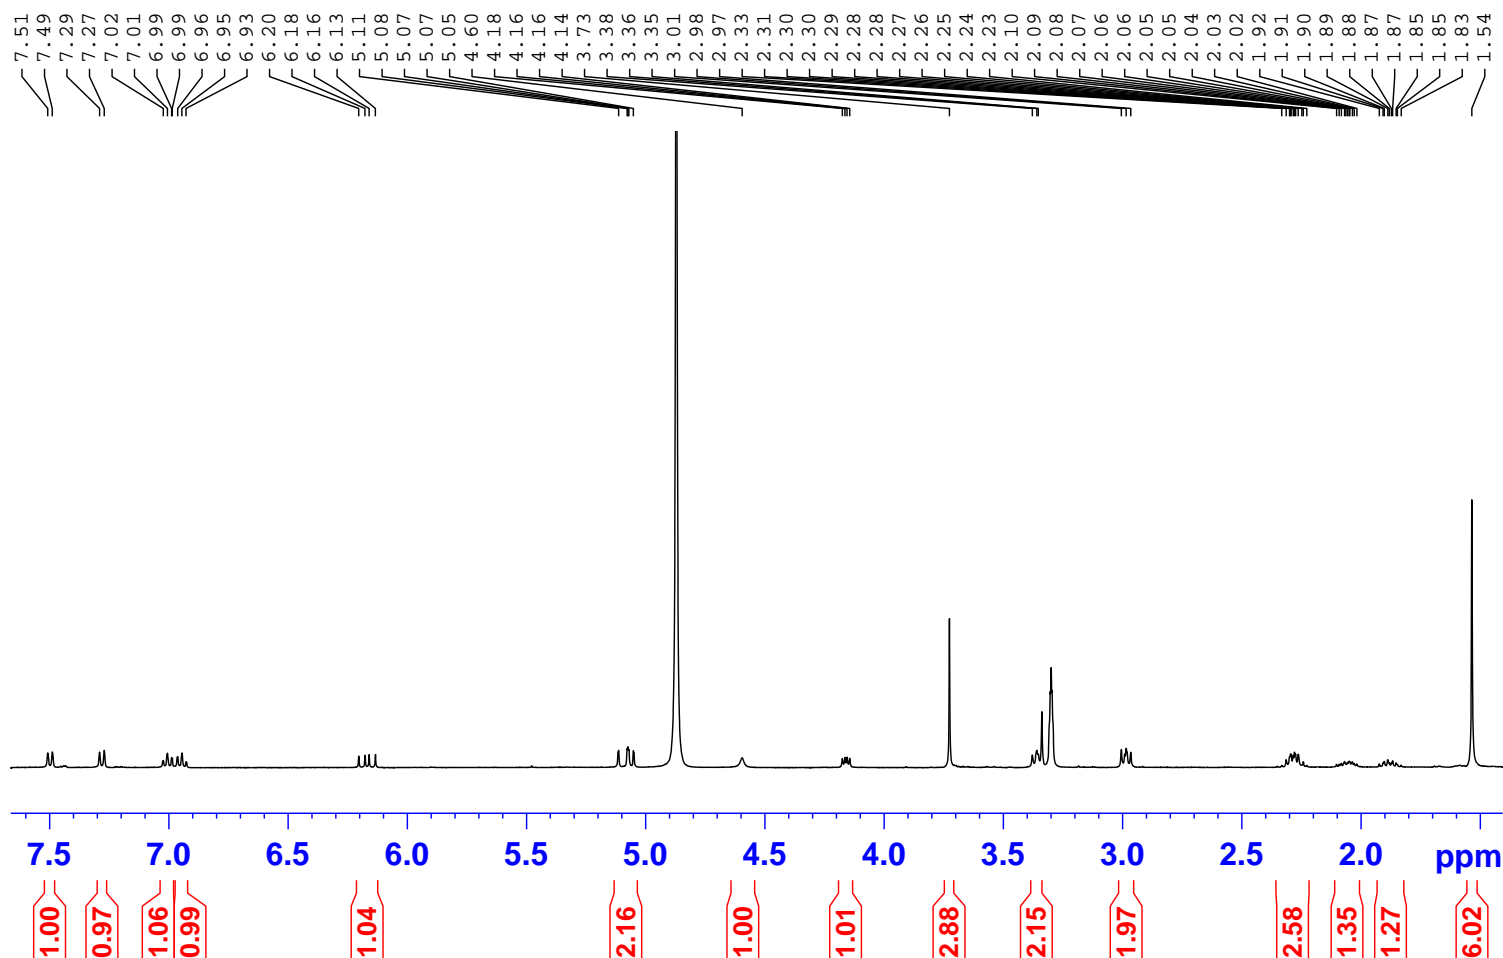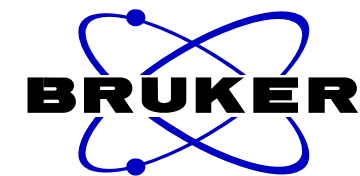

NAME HB2-12 M 3mg  
 EXPNO 1  
 PROCNO 1  
 Date\_ 20200805  
 Time 16.30  
 INSTRUM spect  
 PROBHD 5 mm PABBO BB-  
 PULPROG zg30  
 TD 65536  
 SOLVENT MeOD  
 NS 22  
 DS 2  
 SWH 8012.820 Hz  
 FIDRES 0.122266 Hz  
 AQ 4.0894966 sec  
 RG 203  
 DW 62.400 usec  
 DE 6.50 usec  
 TE 296.2 K  
 D1 1.00000000 sec  
 TD0 1

===== CHANNEL f1 =====  
 SFO1 400.1324710 MHz  
 NUC1 1H  
 P1 13.90 usec  
 SI 32768  
 SF 400.1300116 MHz  
 WDW EM  
 SSB 0  
 LB 0.30 Hz  
 GB 0  
 PC 1.00

Figure S16. <sup>13</sup>C NMR spectrum of 3 in MeOH-d<sub>4</sub>

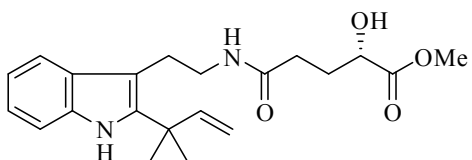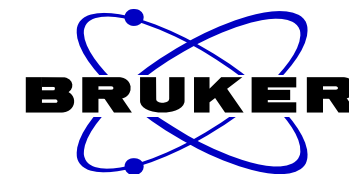

NAME HB2-12 M 3mg  
 EXPNO 2  
 PROCNO 1  
 Date\_ 20200805  
 Time 16.33  
 INSTRUM spect  
 PROBHD 5 mm PABBO BB-  
 PULPROG zgpg30  
 TD 65536  
 SOLVENT MeOD  
 NS 1045  
 DS 4  
 SWH 24038.461 Hz  
 FIDRES 0.366798 Hz  
 AQ 1.3631988 sec  
 RG 203  
 DW 20.800 usec  
 DE 6.50 usec  
 TE 296.3 K  
 D1 2.00000000 sec  
 D11 0.03000000 sec  
 TD0 1

===== CHANNEL f1 =====  
 SF01 100.6228293 MHz  
 NUC1 13C  
 P1 12.37 usec  
 SI 32768  
 SF 100.6126277 MHz  
 WDW EM  
 SSB 0  
 LB 1.00 Hz  
 GB 0  
 PC 1.40

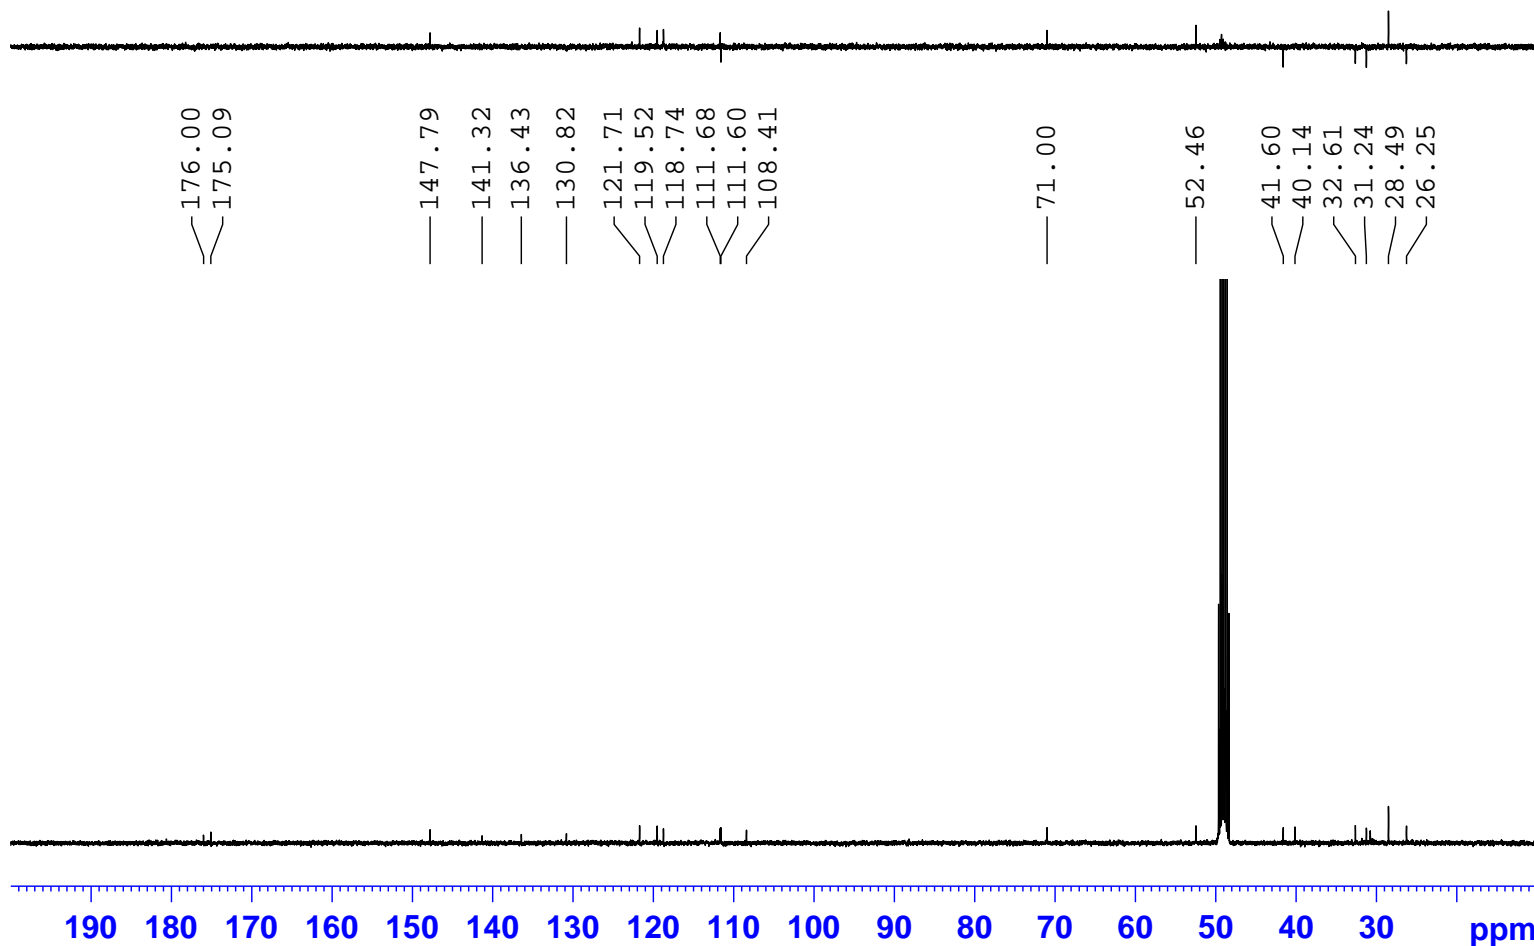

Figure S17. HSQC NMR spectrum of 3 in MeOH-d<sub>4</sub>

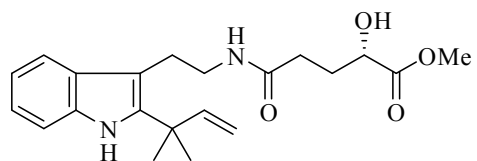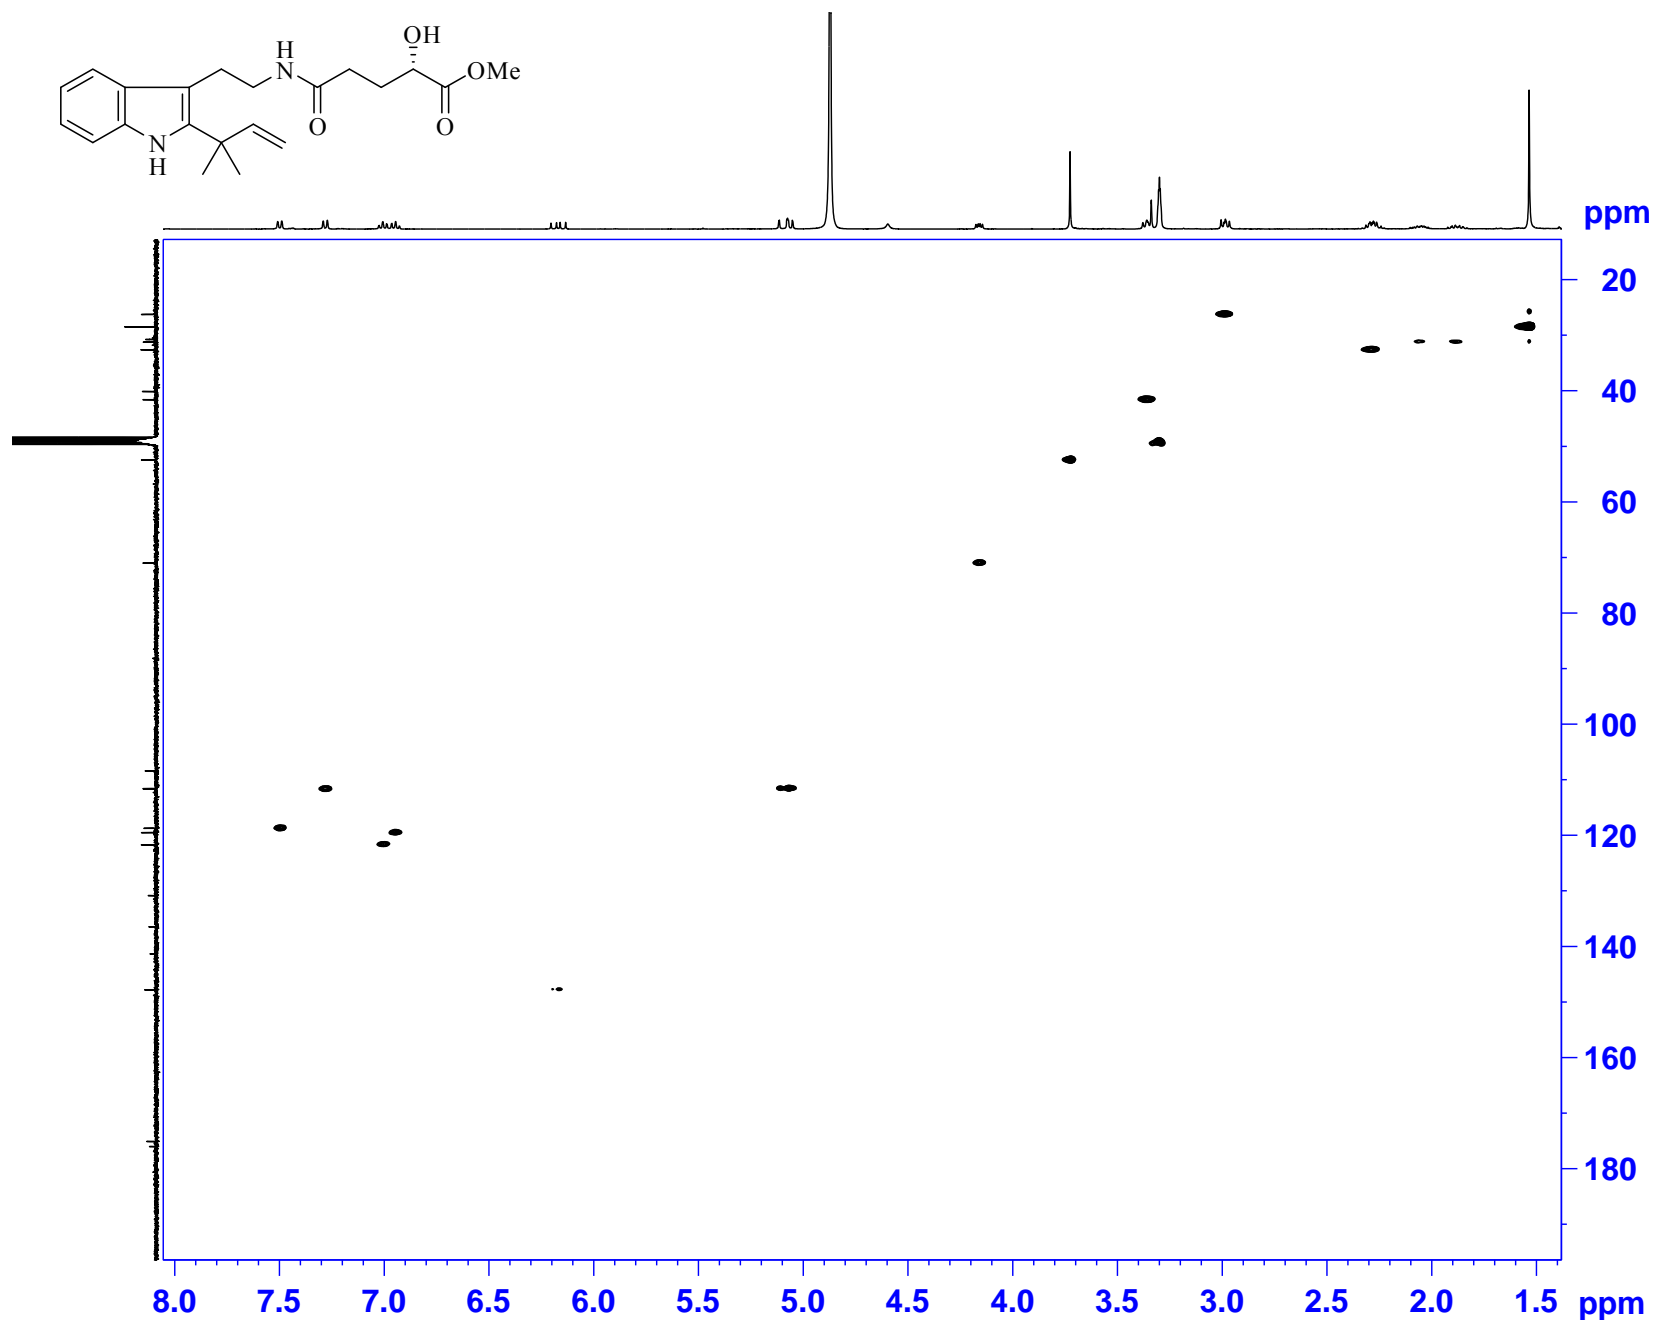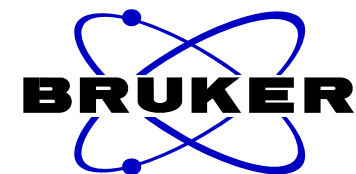

NAME HB2-12 M 3mg  
 EXPNO 4  
 PROCNO 1  
 Date\_ 20200809  
 Time 13.43  
 INSTRUM spect  
 PROBHD 5 mm PABBO BB-  
 PULPROG hsqcetgpsisp2.2  
 TD 1024  
 SOLVENT MeOD  
 NS 32  
 DS 32  
 SWH 3597.122 Hz  
 FIDRES 3.512815 Hz  
 AQ 0.1423860 sec  
 RG 203  
 DW 139.000 usec  
 DE 6.50 usec  
 TE 296.6 K  
 CNST2 145.0000000  
 CNST17 -0.5000000  
 D0 0.00000300 sec  
 D1 2.00000000 sec  
 D4 0.00172414 sec  
 D11 0.03000000 sec  
 D16 0.00020000 sec  
 D24 0.00089000 sec  
 IN0 0.00002480 sec

===== CHANNEL f1 =====  
 SFO1 400.1318006 MHz  
 NUC1 1H  
 P1 13.90 usec  
 P2 27.80 usec  
 P28 1000.00 usec  
 ND0 2  
 TD 256  
 SFO1 100.6228 MHz  
 FIDRES 78.755043 Hz  
 SW 200.365 ppm  
 FnMODE Echo-Antiecho  
 SI 1024  
 SF 400.1300116 MHz  
 WDW QSINE  
 SSB 2  
 LB 0.00 Hz  
 GB 0  
 PC 1.40  
 SI 1024  
 MC2 echo-antiecho  
 SF 100.6126277 MHz  
 WDW QSINE  
 SSB 2  
 LB 0.00 Hz  
 GB 0

Figure S18. HSQC NMR spectrum of 3 in MeOH-d<sub>4</sub>

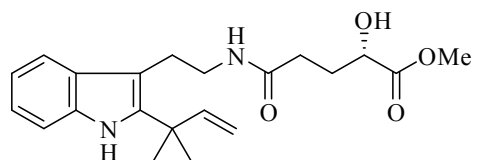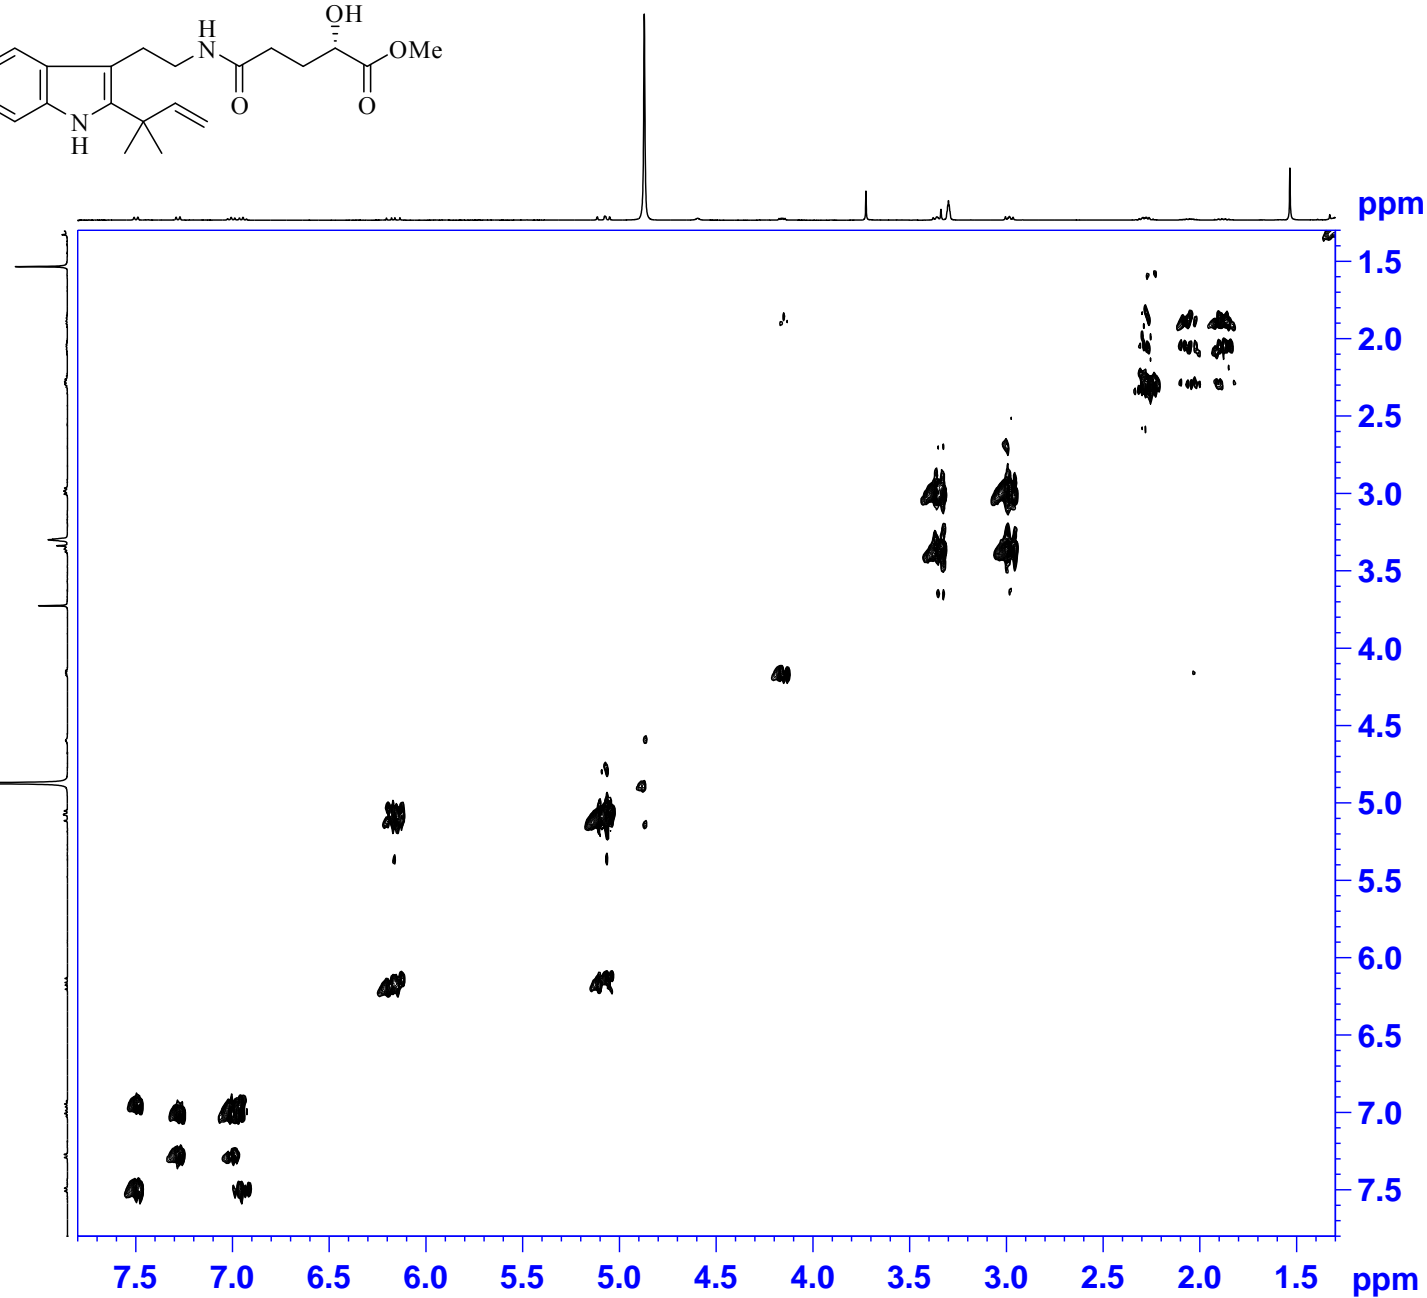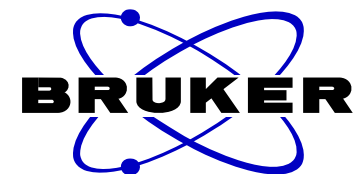

NAME HB2-12 M 3mg  
 EXPNO 5  
 PROCNO 1  
 Date\_ 20200809  
 Time 18.40  
 INSTRUM spect  
 PROBHD 5 mm PABBO BB-  
 PULPROG cosygpmfzf  
 TD 2048  
 SOLVENT MeOD  
 NS 32  
 DS 8  
 SWH 3597.122 Hz  
 FIDRES 1.756407 Hz  
 AQ 0.2847220 sec  
 RG 203  
 DW 139.000 usec  
 DE 6.50 usec  
 TE 296.3 K  
 D0 0.00000300 sec  
 D1 2.00000000 sec  
 D13 0.00000400 sec  
 D16 0.00020000 sec  
 IN0 0.00027760 sec

===== CHANNEL f1 =====  
 SFO1 400.1318006 MHz  
 NUC1 1H  
 P1 13.90 usec  
 ND0 1  
 TD 128  
 SFO1 400.1318 MHz  
 FIDRES 28.143011 Hz  
 SW 9.003 ppm  
 FmMODE QF  
 SI 1024  
 SF 400.1300116 MHz  
 WDW SINE  
 SSB 0  
 LB 0.00 Hz  
 GB 0  
 PC 1.40  
 SI 1024  
 MC2 QF  
 SF 400.1300116 MHz  
 WDW SINE  
 SSB 0  
 LB 0.00 Hz  
 GB 0

Figure S19. HMBC NMR spectrum of 3 in MeOH-d<sub>4</sub>

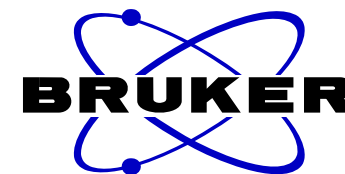

NAME HB2-12 M 3mg  
 EXPNO 6  
 PROCNO 1  
 Date\_ 20200809  
 Time 21.19  
 INSTRUM spect  
 PROBHD 5 mm PABBO BB-  
 PULPROG hmbcgpndqf  
 TD 4096  
 SOLVENT MeOD  
 NS 64  
 DS 16  
 SWH 3597.122 Hz  
 FIDRES 0.878204 Hz  
 AQ 0.5693940 sec  
 RG 203  
 DW 139.000 usec  
 DE 6.50 usec  
 TE 295.9 K  
 CNST13 8.0000000  
 D0 0.00000300 sec  
 D1 1.50000000 sec  
 D6 0.06250000 sec  
 D16 0.00020000 sec  
 IN0 0.00002480 sec

===== CHANNEL f1 =====  
 SFO1 400.1318006 MHz  
 NUC1 1H  
 P1 13.90 usec  
 P2 27.80 usec  
 ND0 2  
 TD 128  
 SFO1 100.6228 MHz  
 FIDRES 157.510086 Hz  
 SW 200.365 ppm  
 FnMODE QF  
 SI 1024  
 SF 400.1300116 MHz  
 WDW SINE  
 SSB 0  
 LB 0.00 Hz  
 GB 0  
 PC 1.40  
 SI 1024  
 MC2 QF  
 SF 100.6126277 MHz  
 WDW SINE  
 SSB 0  
 LB 0.00 Hz  
 GB 0

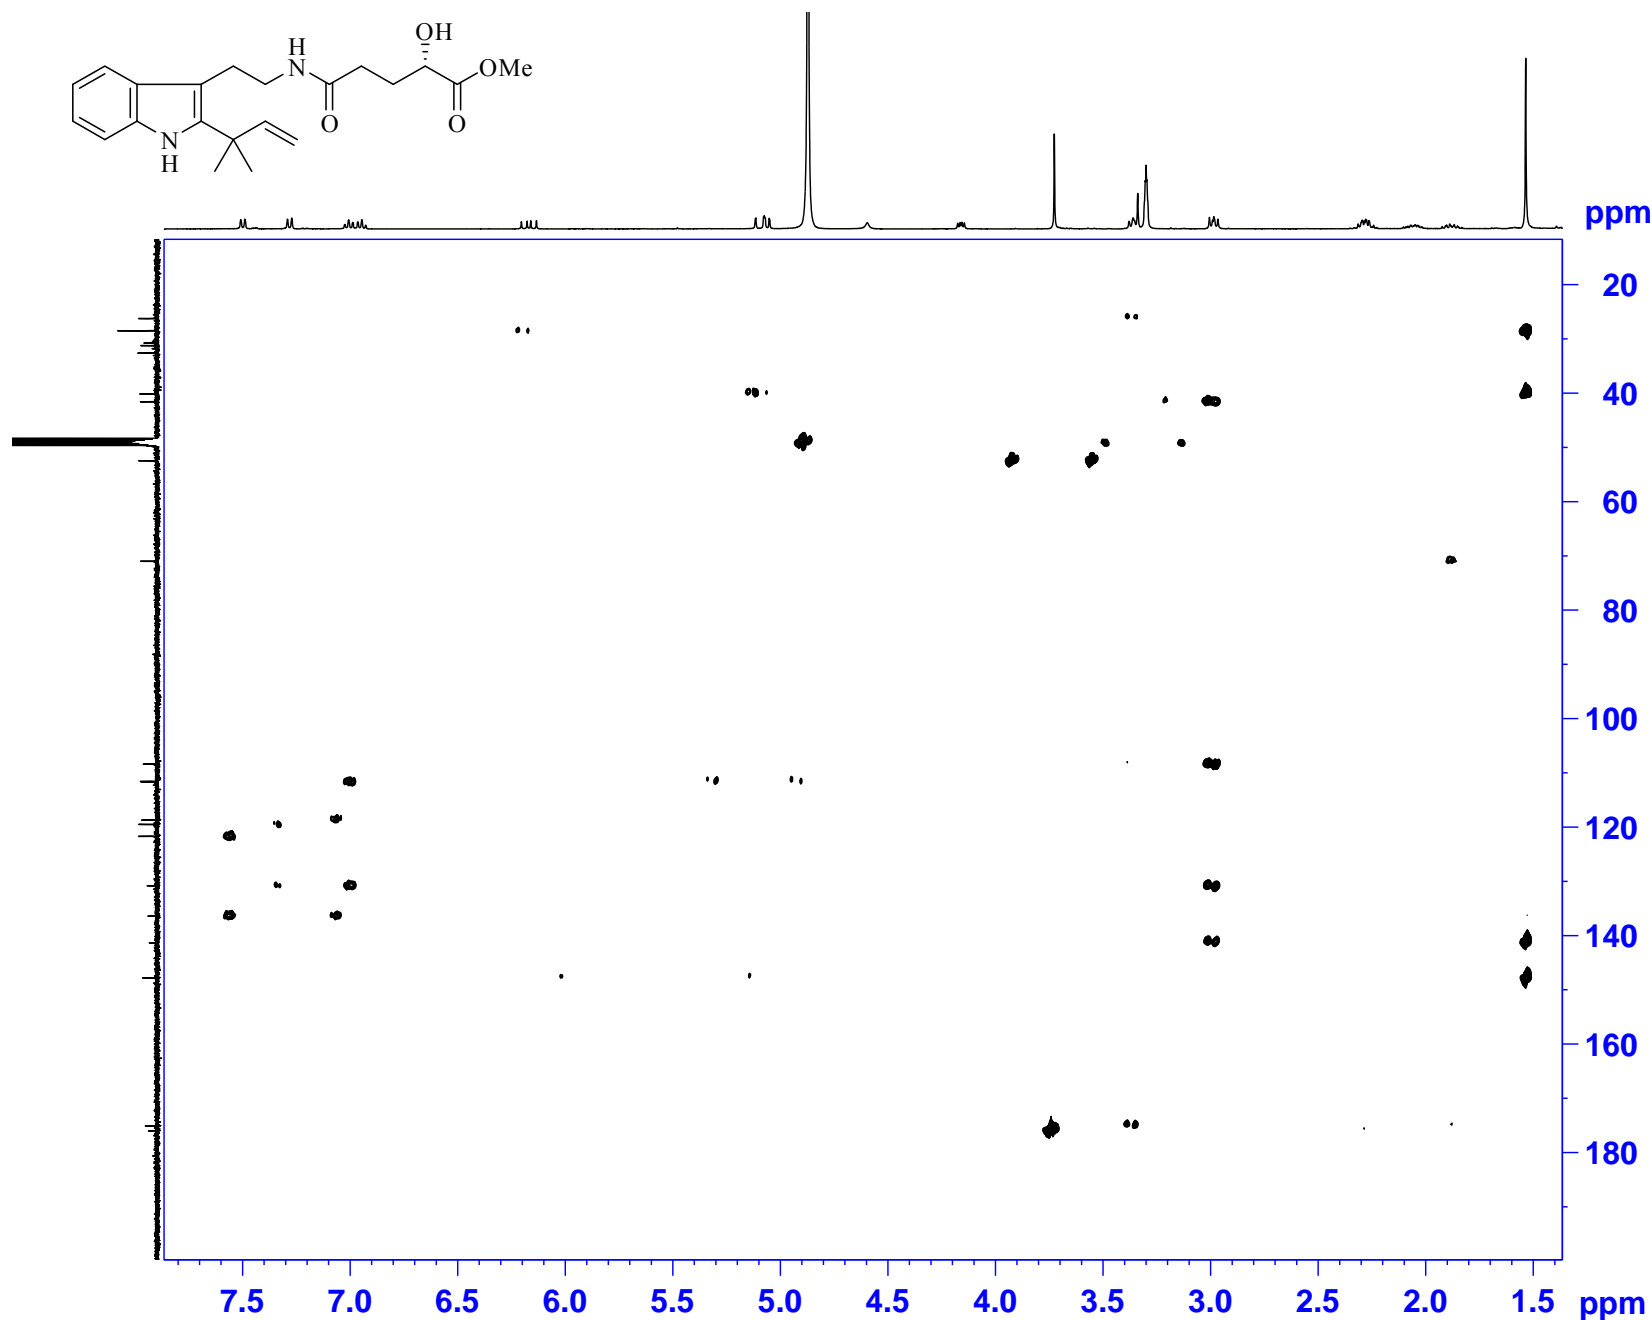

HB2-12 M 3mg NOE

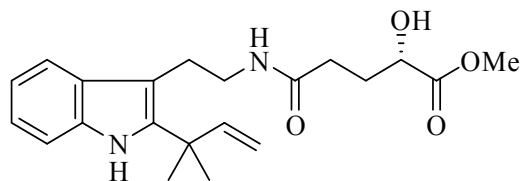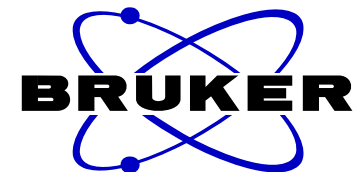

NAME HB2-12 M 3mg  
 EXPNO 7  
 PROCNO 1  
 Date\_ 20200810  
 Time 2.13  
 INSTRUM spect  
 PROBHD 5 mm PABBO BB-  
 PULPROG noesygpphpp  
 TD 2048  
 SOLVENT MeOD  
 NS 32  
 DS 32  
 SWH 3597.122 Hz  
 FIDRES 1.756407 Hz  
 AQ 0.2847220 sec  
 RG 203  
 DW 139.000 usec  
 DE 6.50 usec  
 TE 296.0 K  
 D0 0.00012110 sec  
 D1 2.00000000 sec  
 D8 0.30000001 sec  
 D11 0.03000000 sec  
 D12 0.00002000 sec  
 D16 0.00020000 sec  
 IN0 0.00027760 sec

===== CHANNEL f1 =====  
 SFO1 400.1318006 MHz  
 NUC1 1H  
 P1 13.90 usec  
 P2 27.80 usec  
 P17 2500.00 usec  
 ND0 1  
 TD 256  
 SFO1 400.1318 MHz  
 FIDRES 14.071506 Hz  
 SW 9.003 ppm  
 FnmODE States-TPPI  
 SI 1024  
 SF 400.1300116 MHz  
 WDW QSINE  
 SSB 2  
 LB 0.00 Hz  
 GB 0  
 PC 1.00  
 SI 1024  
 MC2 States-TPPI  
 SF 400.1300116 MHz  
 WDW QSINE  
 SSB 2  
 LB 0.00 Hz  
 GB 0

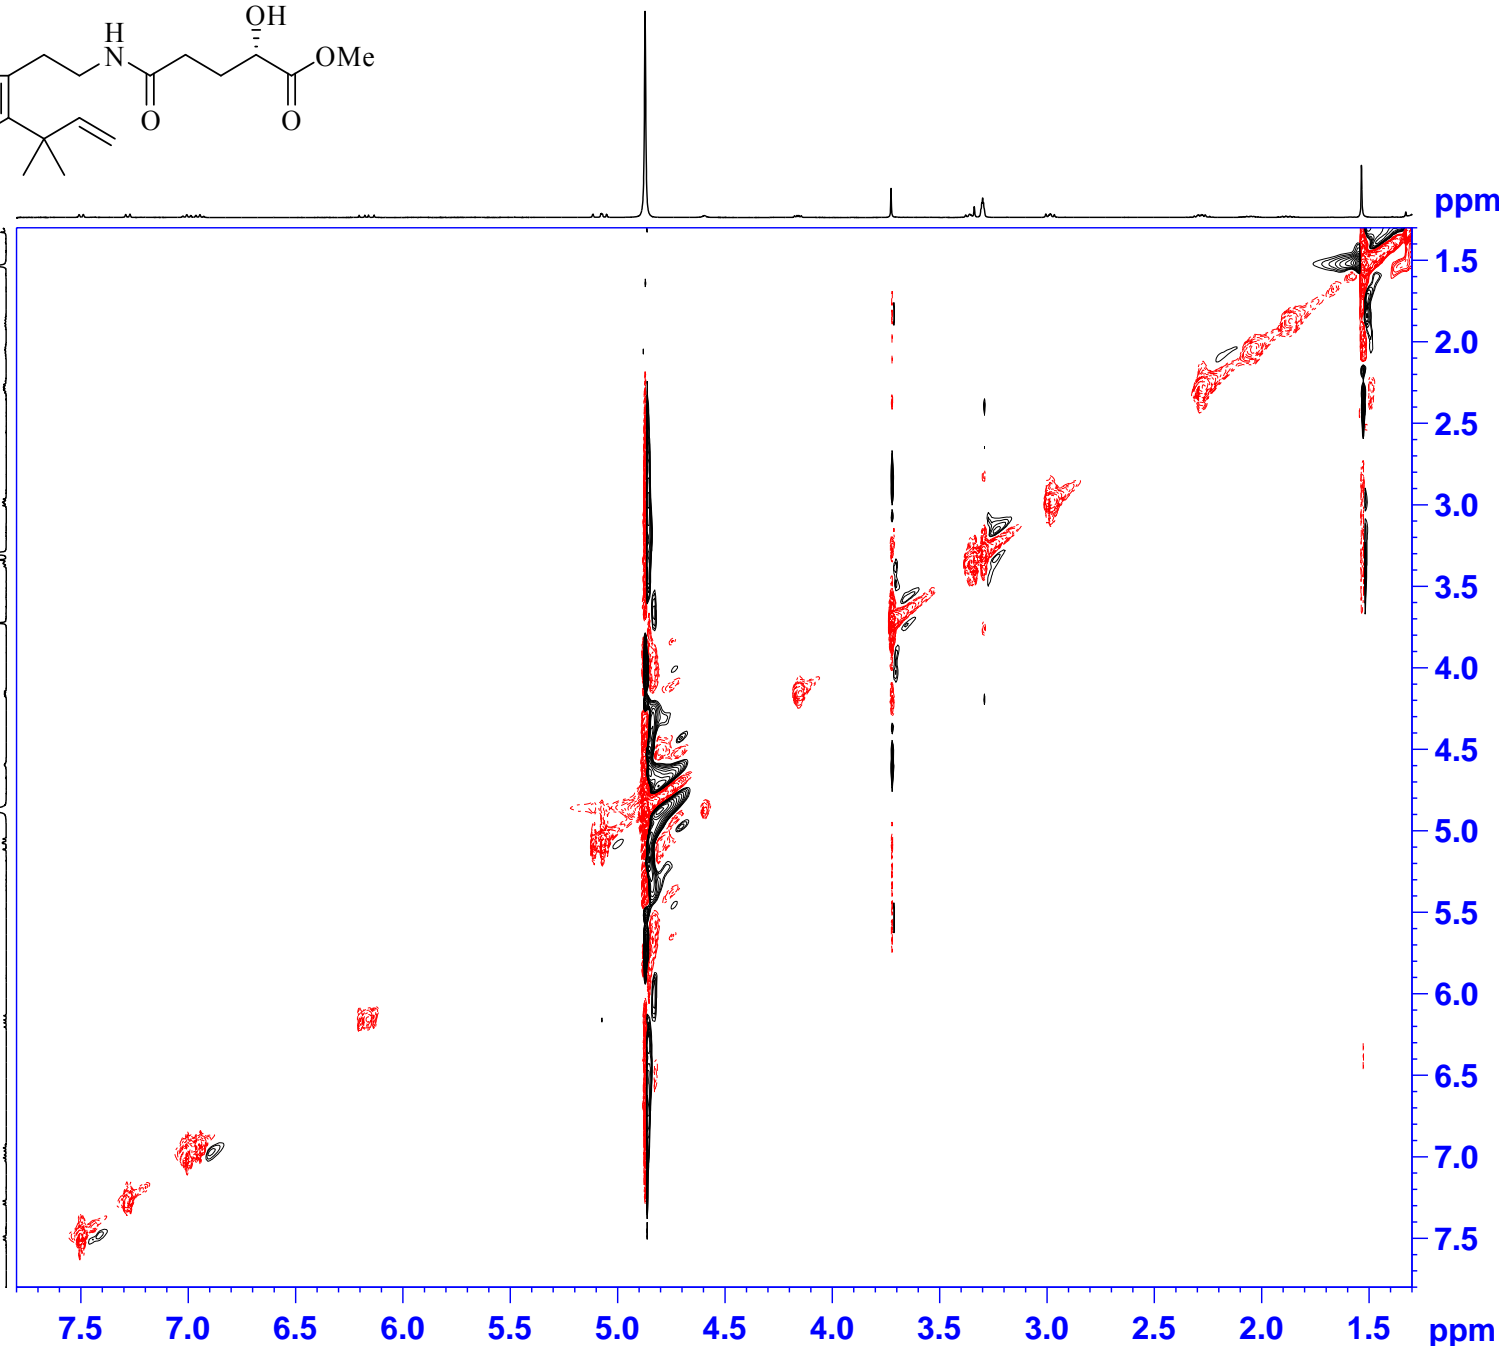

Figure S20. NOESY NMR spectrum of **3** in MeOH- $d_4$ .

## Single Mass Analysis

Tolerance = 10.0 PPM / DBE: min = -1.5, max = 50.0

Element prediction: Off

Number of isotope peaks used for i-FIT = 3

Monoisotopic Mass, Even Electron Ions

700 formula(e) evaluated with 1 results within limits (up to 50 closest results for each mass)

Elements Used:

C: 19-20 H: 1-100 N: 0-20 O: 0-30 <sup>23</sup>Na: 0-1

HB 2-12-Oct 92 (0.368)

1: TOF MS ES+

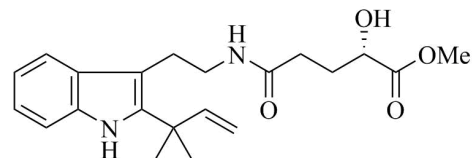Chemical Formula: C<sub>21</sub>H<sub>28</sub>N<sub>2</sub>O<sub>4</sub>

Molecular Weight: 372.4650

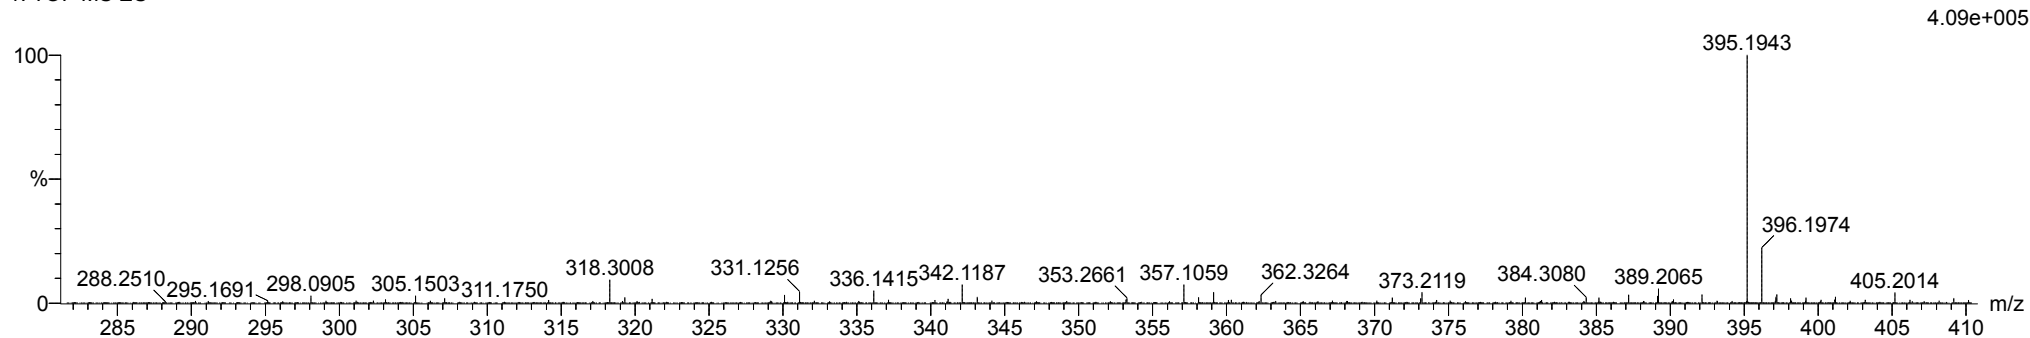

Minimum: -1.5  
Maximum: 50.0 10.0 50.0

| Mass     | Calc. Mass | mDa  | PPM  | DBE  | i-FIT | Norm | Conf(%) | Formula       |
|----------|------------|------|------|------|-------|------|---------|---------------|
| 395.1943 | 395.1944   | -0.1 | -0.3 | 12.5 | 775.7 | n/a  | n/a     | C19 H23 N8 O2 |

Figure S21. The HR-ESI-MS spectrum of **3**.

HB4-7 D 2mg H

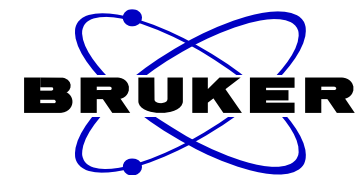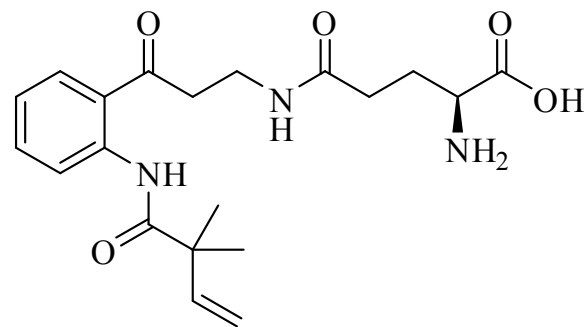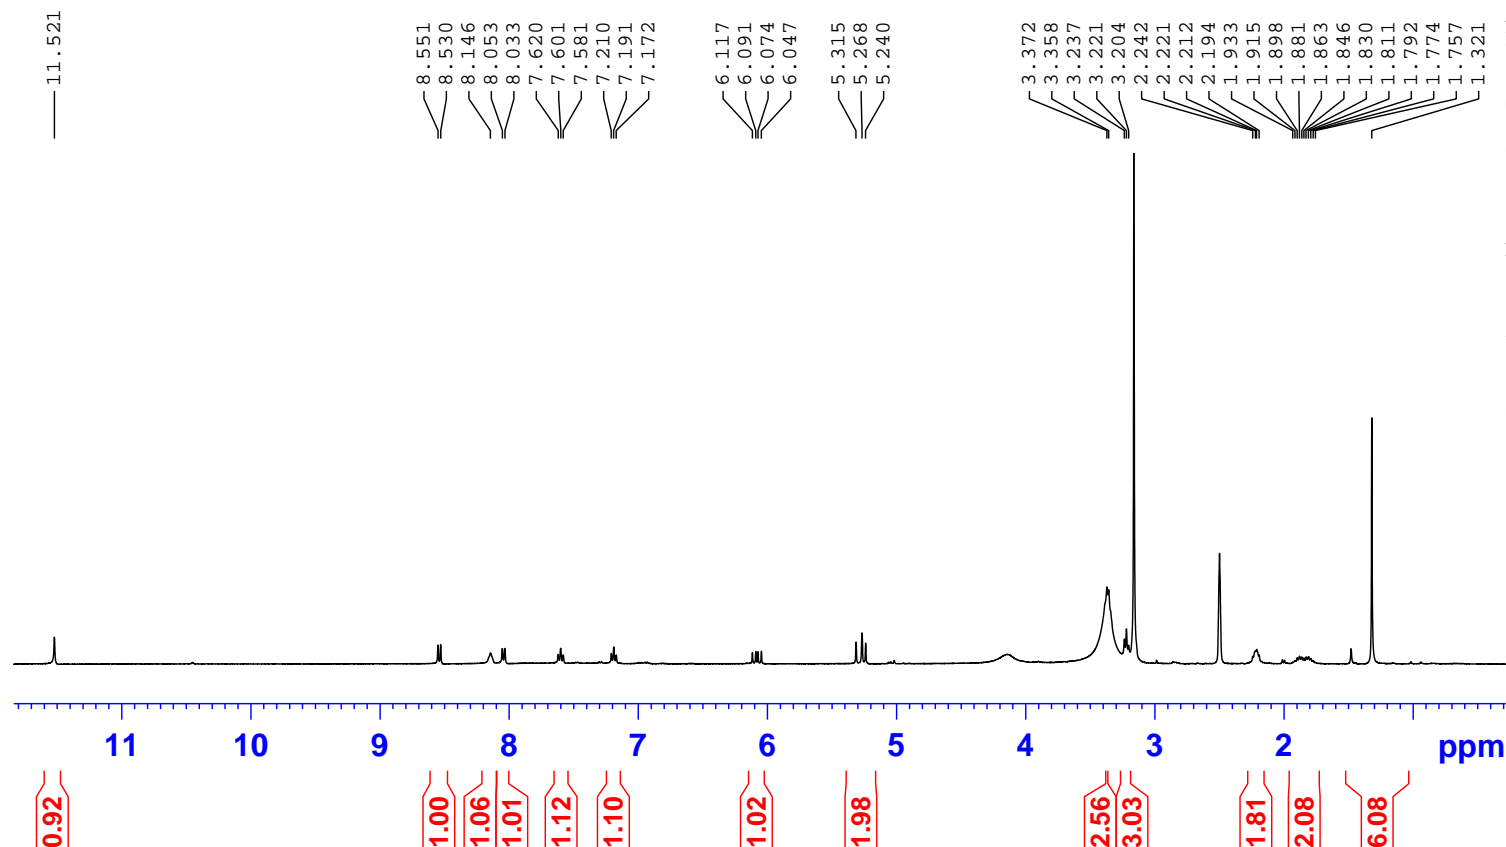

NAME HB4-7 D 2mg  
 EXPNO 1  
 PROCNO 1  
 Date\_ 20200108  
 Time 20.35  
 INSTRUM spect  
 PROBHD 5 mm PABBO BB-  
 PULPROG zg30  
 TD 65536  
 SOLVENT DMSO  
 NS 19  
 DS 2  
 SWH 8012.820 Hz  
 FIDRES 0.122266 Hz  
 AQ 4.0894966 sec  
 RG 203  
 DW 62.400 usec  
 DE 6.50 usec  
 TE 292.8 K  
 D1 1.00000000 sec  
 TD0 1

===== CHANNEL f1 =====  
 SFO1 400.1324710 MHz  
 NUC1 1H  
 P1 13.90 usec  
 SI 32768  
 SF 400.1300028 MHz  
 WDW EM  
 SSB 0  
 LB 0.30 Hz  
 GB 0  
 PC 1.00

Figure S22. <sup>1</sup>H NMR spectrum of 4.



HB4-7 D 2mg C

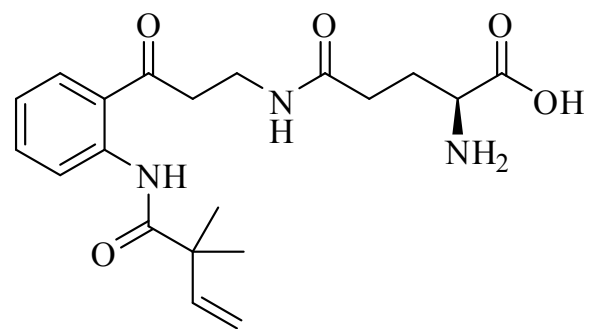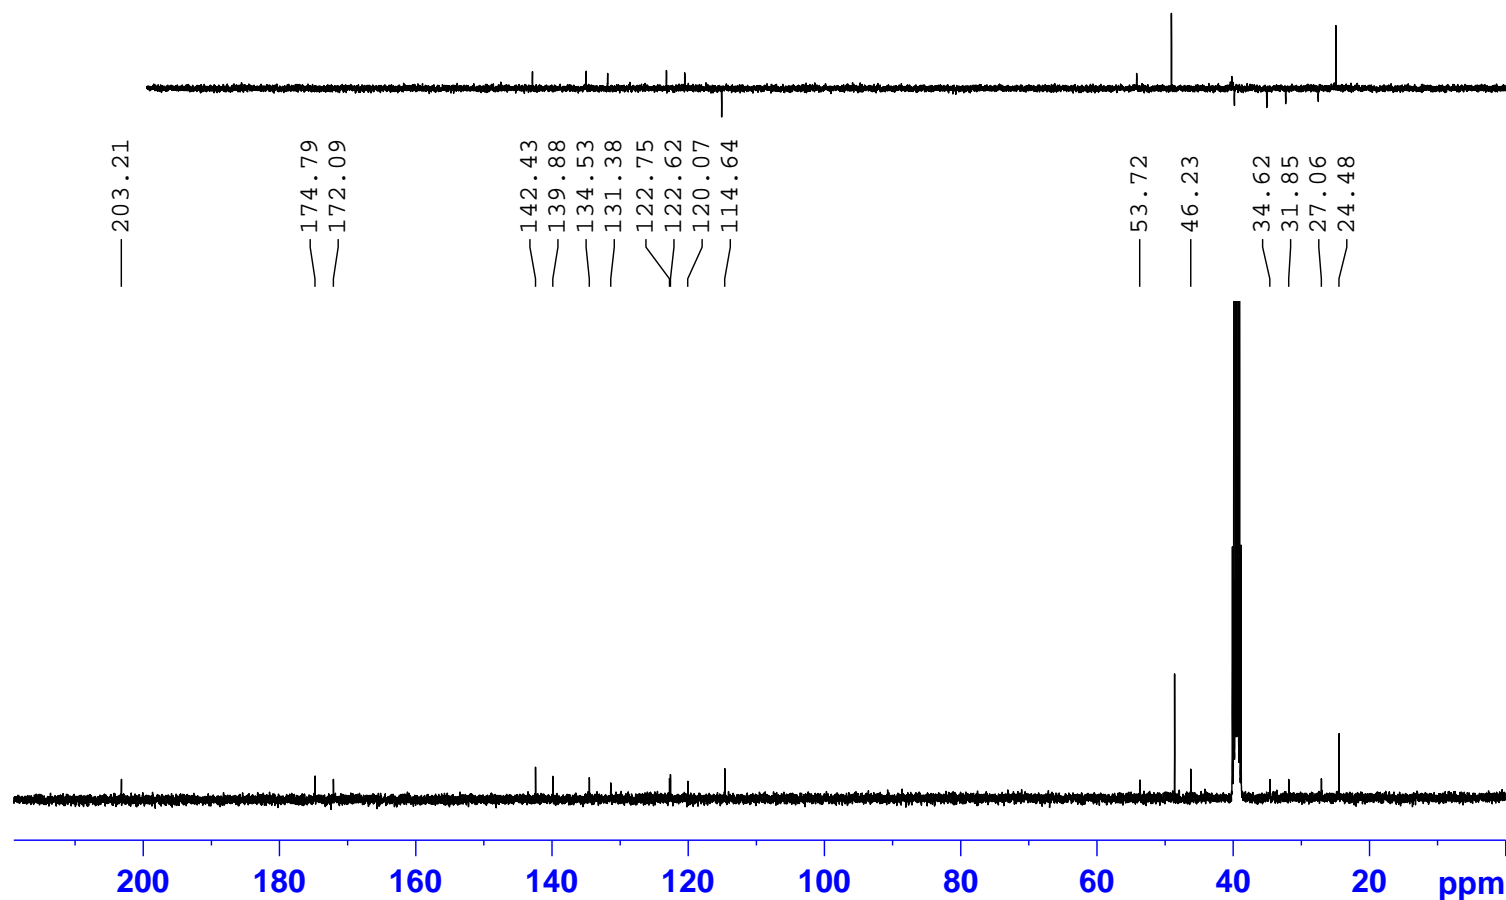

NAME HB4-7 D 2mg  
EXPNO 2  
PROCNO 1  
Date\_ 20200108  
Time 20.38  
INSTRUM spect  
PROBHD 5 mm PABBO BB-  
PULPROG zgpg30  
TD 65536  
SOLVENT DMSO  
NS 711  
DS 4  
SWH 24038.461 Hz  
FIDRES 0.366798 Hz  
AQ 1.3631988 sec  
RG 203  
DW 20.800 usec  
DE 6.50 usec  
TE 292.9 K  
D1 2.00000000 sec  
D11 0.03000000 sec  
TD0 1

===== CHANNEL f1 =====  
SFO1 100.6228293 MHz  
NUC1 13C  
P1 12.37 usec  
SI 32768  
SF 100.6128133 MHz  
WDW EM  
SSB 0  
LB 1.00 Hz  
GB 0  
PC 1.40

Figure S23. <sup>13</sup>C NMR spectrum of 4.

HB2-13 C 5mg H

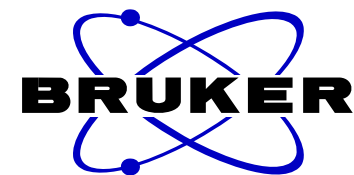

NAME HB2-13 C 5mg  
EXPNO 1  
PROCNO 1  
Date\_ 20200805  
Time 18.50  
INSTRUM spect  
PROBHD 5 mm PABBO BB-  
PULPROG zg30  
TD 65536  
SOLVENT CDCl3  
NS 21  
DS 2  
SWH 8012.820 Hz  
FIDRES 0.122266 Hz  
AQ 4.0894966 sec  
RG 203  
DW 62.400 usec  
DE 6.50 usec  
TE 296.3 K  
D1 1.00000000 sec  
TD0 1

===== CHANNEL f1 =====  
SFO1 400.1324710 MHz  
NUC1 1H  
P1 13.90 usec  
SI 32768  
SF 400.1300000 MHz  
WDW EM  
SSB 0  
LB 0.30 Hz  
GB 0  
PC 1.00

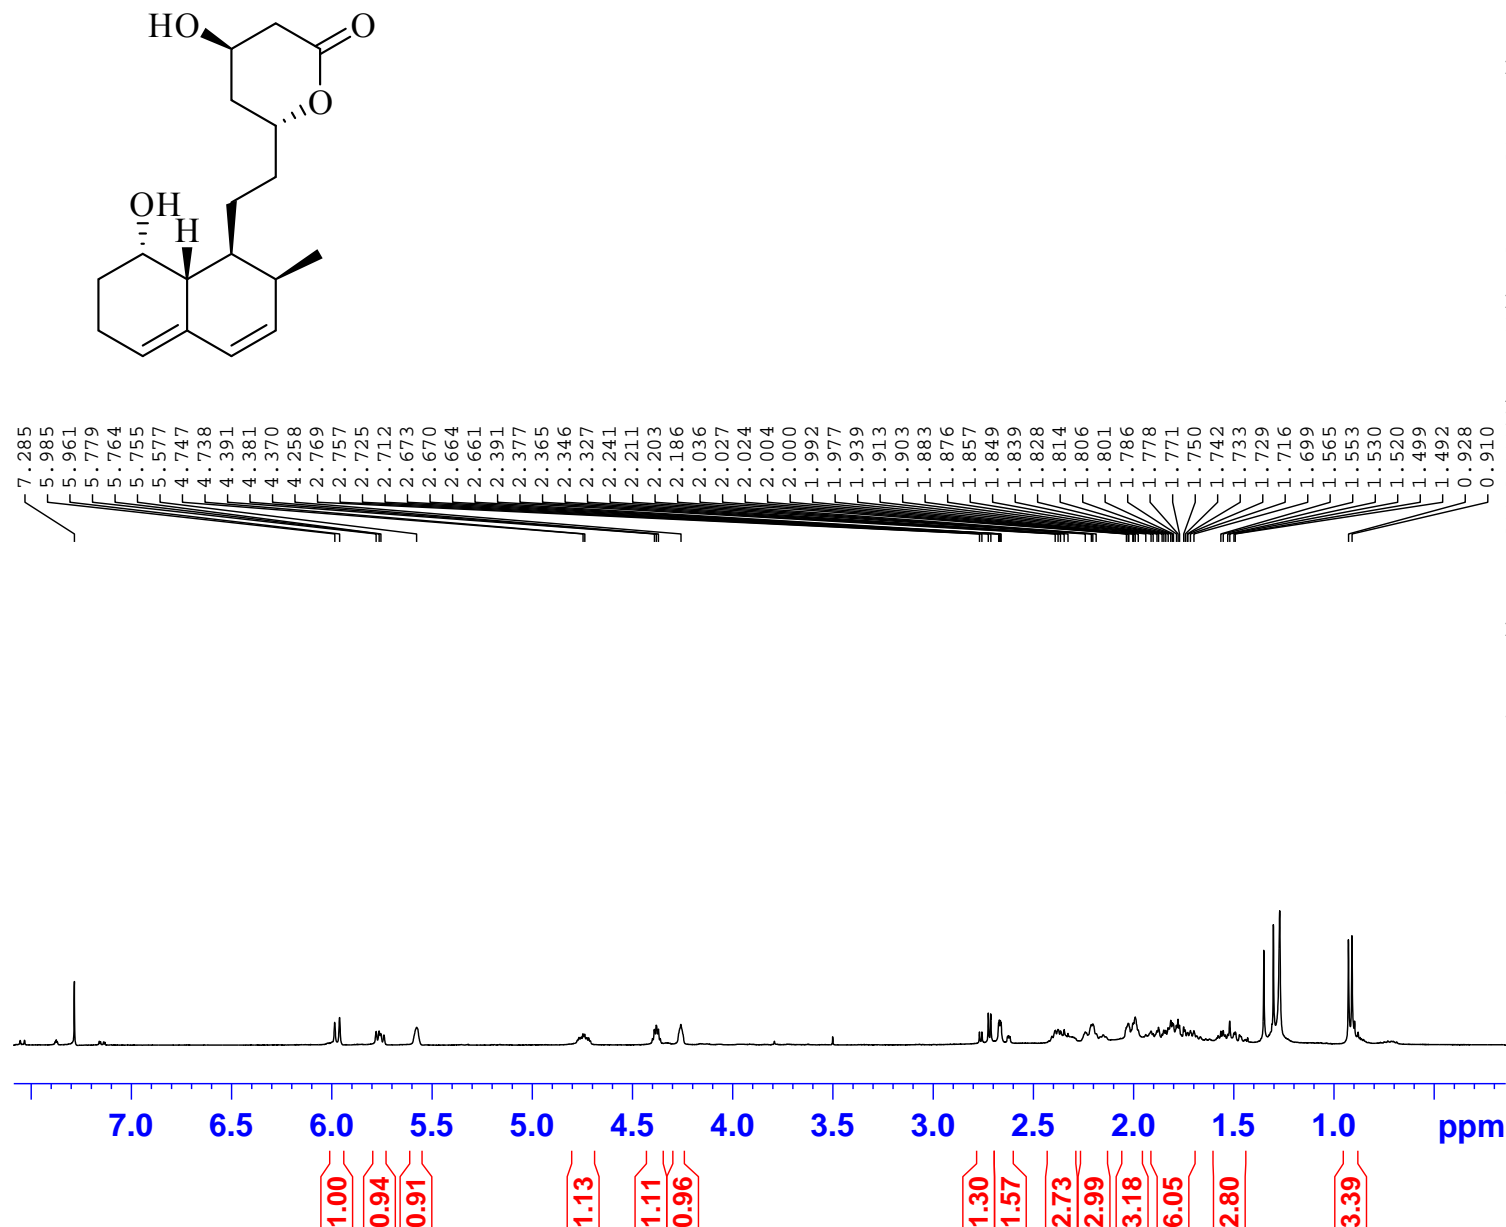

Figure S24. <sup>1</sup>H NMR spectrum of 5.

HB2-13 C 5mg C

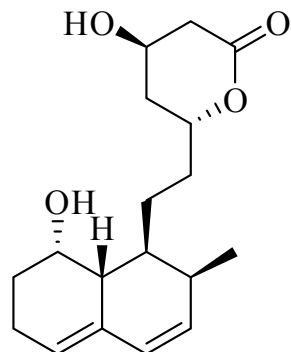

NAME HB2-13 C 5mg  
 EXPNO 2  
 PROCNO 1  
 Date\_ 20200805  
 Time 18.53  
 INSTRUM spect  
 PROBHD 5 mm PABBO BB-  
 PULPROG zgpg30  
 TD 65536  
 SOLVENT CDCl3  
 NS 524  
 DS 4  
 SWH 24038.461 Hz  
 FIDRES 0.366798 Hz  
 AQ 1.3631988 sec  
 RG 203  
 DW 20.800 usec  
 DE 6.50 usec  
 TE 296.6 K  
 D1 2.00000000 sec  
 D11 0.03000000 sec  
 TD0 1

===== CHANNEL f1 =====  
 SFO1 100.6228293 MHz  
 NUC1 13C  
 P1 12.37 usec  
 SI 32768  
 SF 100.6127717 MHz  
 WDW EM  
 SSB 0  
 LB 1.00 Hz  
 GB 0  
 PC 1.40

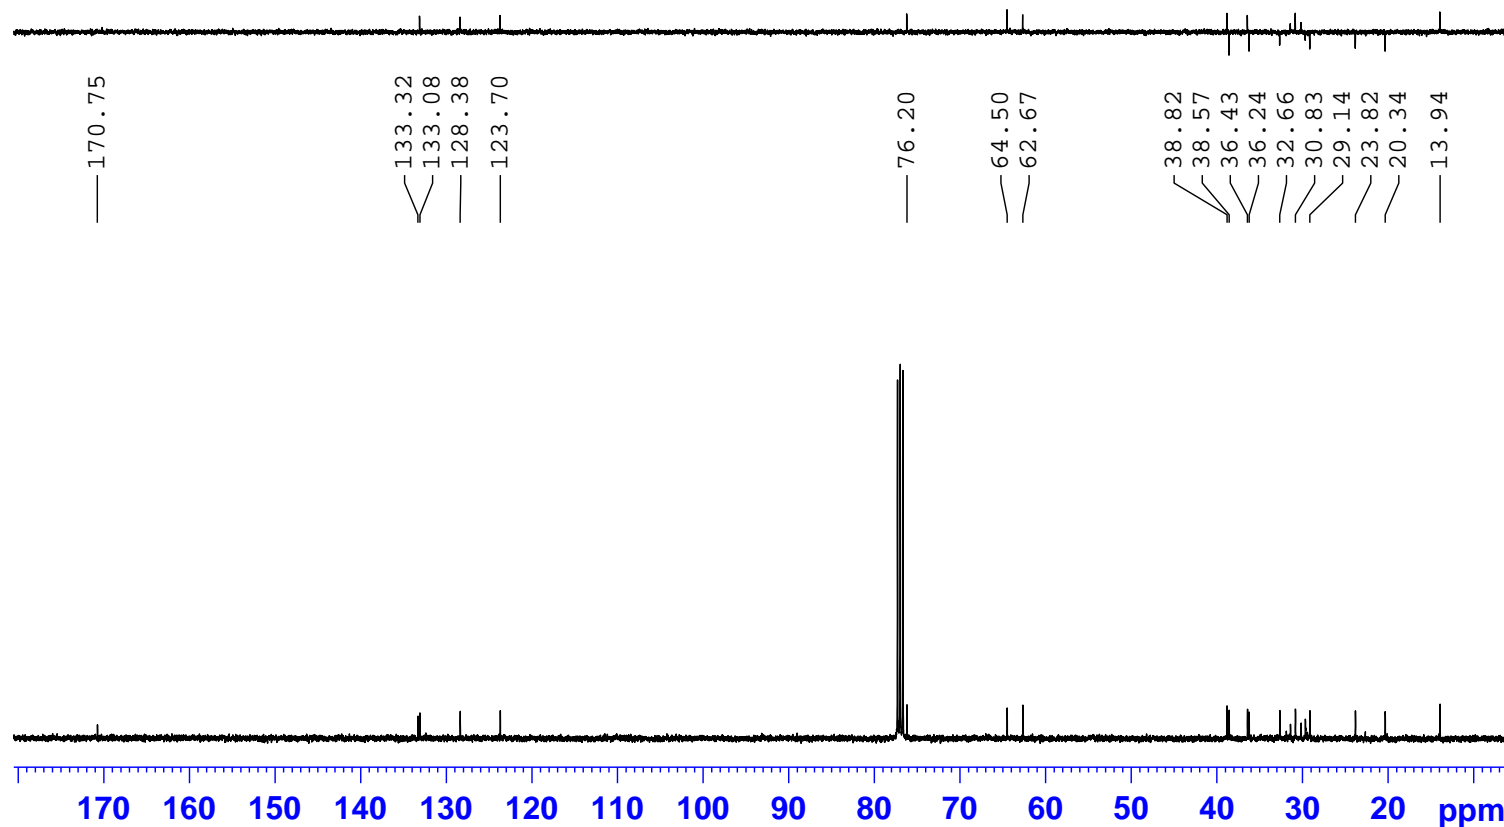

Figure S25. <sup>13</sup>C NMR spectrum of 5.

HB4-3 D 30mg H

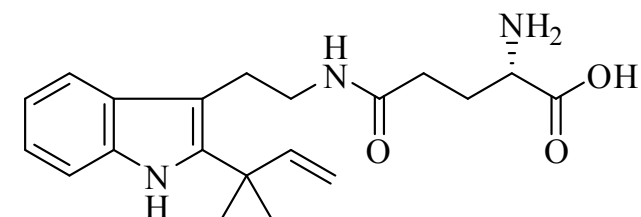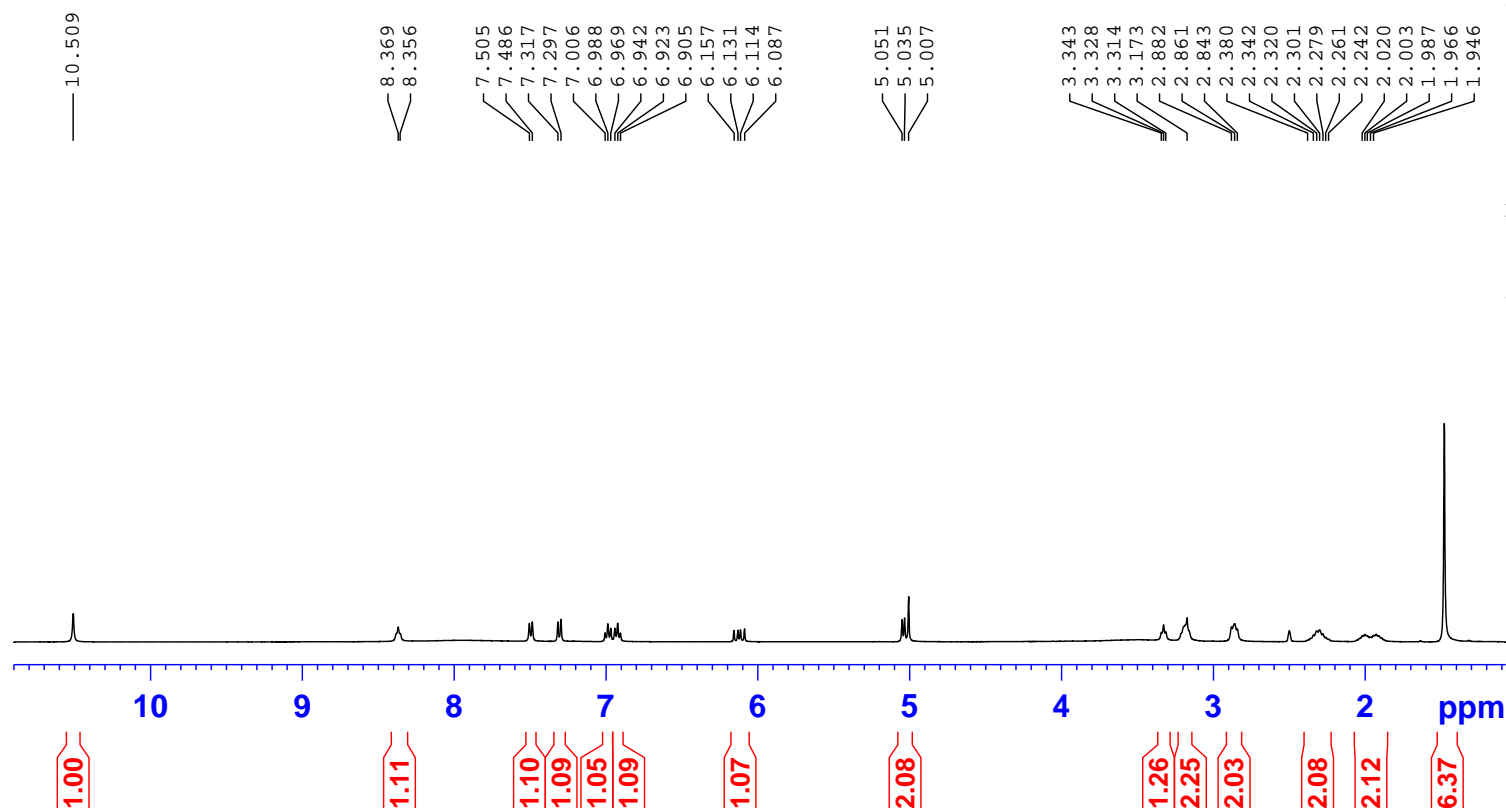

NAME HB4-5-2 D 30mg  
 EXPNO 1  
 PROCNO 1  
 Date\_ 20200108  
 Time 21.38  
 INSTRUM spect  
 PROBHD 5 mm PABBO BB-  
 PULPROG zg30  
 TD 65536  
 SOLVENT DMSO  
 NS 23  
 DS 2  
 SWH 8012.820 Hz  
 FIDRES 0.122266 Hz  
 AQ 4.0894966 sec  
 RG 71.8  
 DW 62.400 usec  
 DE 6.50 usec  
 TE 292.8 K  
 D1 1.00000000 sec  
 TD0 1

===== CHANNEL f1 =====  
 SFO1 400.1324710 MHz  
 NUC1 1H  
 P1 13.90 usec  
 SI 32768  
 SF 400.1300026 MHz  
 WDW EM  
 SSB 0  
 LB 0.30 Hz  
 GB 0  
 PC 1.00

Figure S26. <sup>1</sup>H NMR spectrum of **6**.

HB4-3 D 30mg C

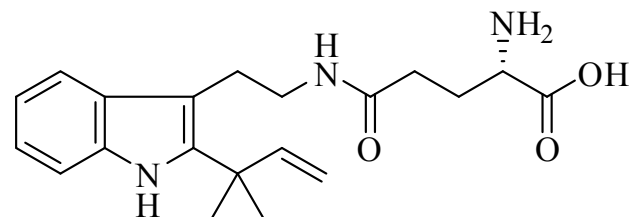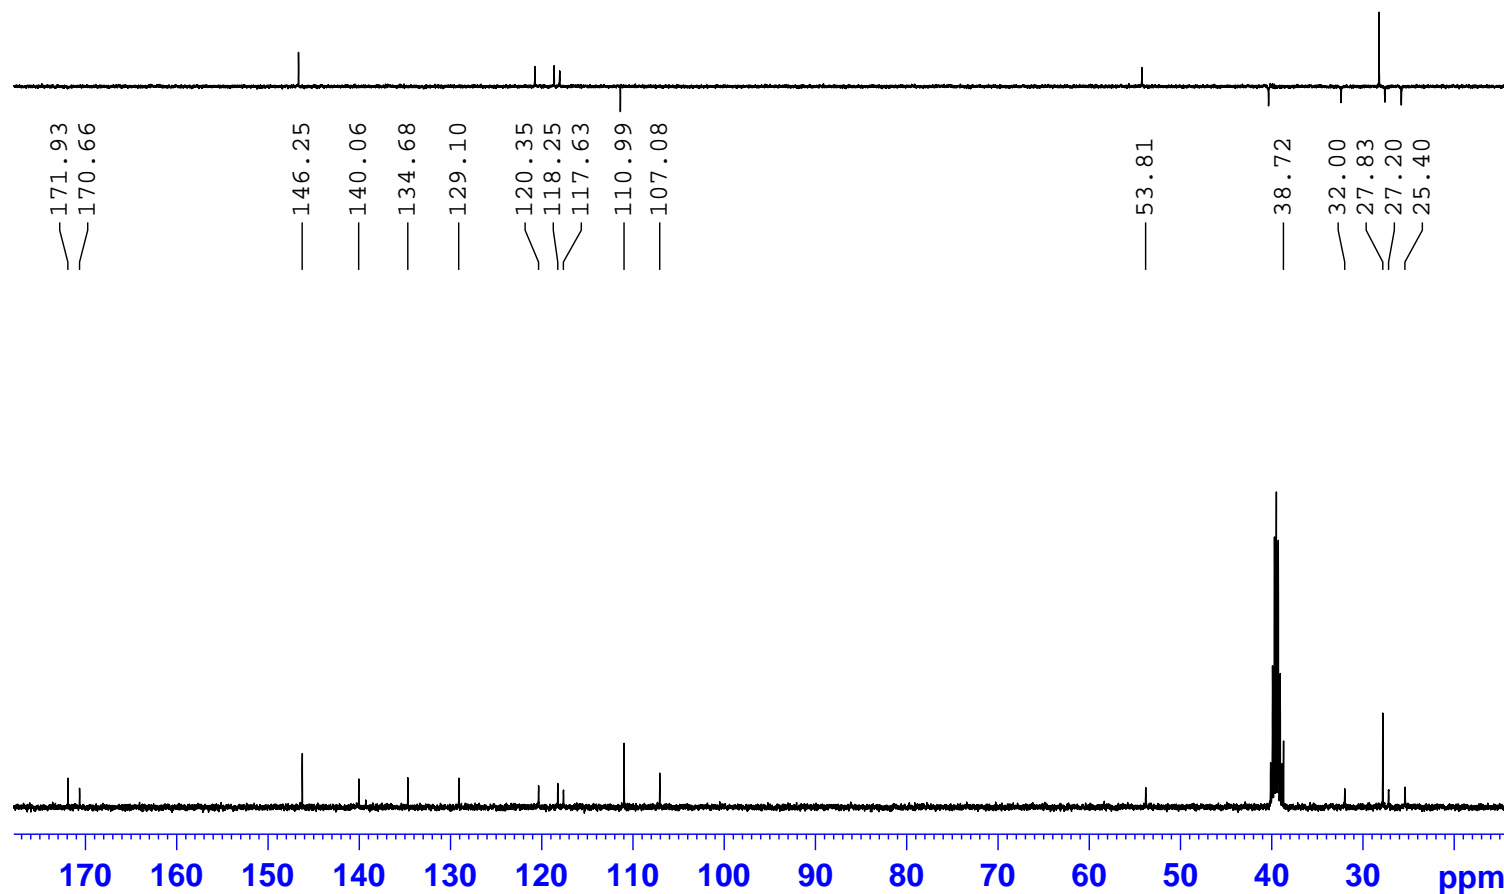

NAME HB4-5-2 D 30mg  
EXPNO 2  
PROCNO 1  
Date\_ 20200108  
Time 21.42  
INSTRUM spect  
PROBHD 5 mm PABBO BB-  
PULPROG zgpg30  
TD 65536  
SOLVENT DMSO  
NS 59  
DS 4  
SWH 24038.461 Hz  
FIDRES 0.366798 Hz  
AQ 1.3631988 sec  
RG 203  
DW 20.800 usec  
DE 6.50 usec  
TE 293.0 K  
D1 2.00000000 sec  
D11 0.03000000 sec  
TD0 1

===== CHANNEL f1 =====  
SF01 100.6228293 MHz  
NUC1 13C  
P1 12.37 usec  
SI 32768  
SF 100.6128097 MHz  
WDW EM  
SSB 0  
LB 1.00 Hz  
GB 0  
PC 1.40

Figure S27. <sup>13</sup>C NMR spectrum of **6**.

HB2-7 C 12mg H

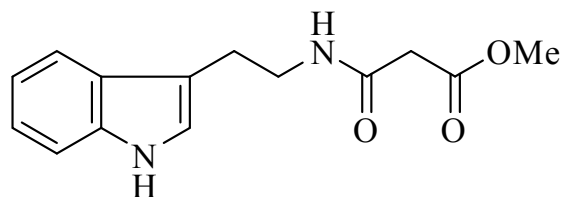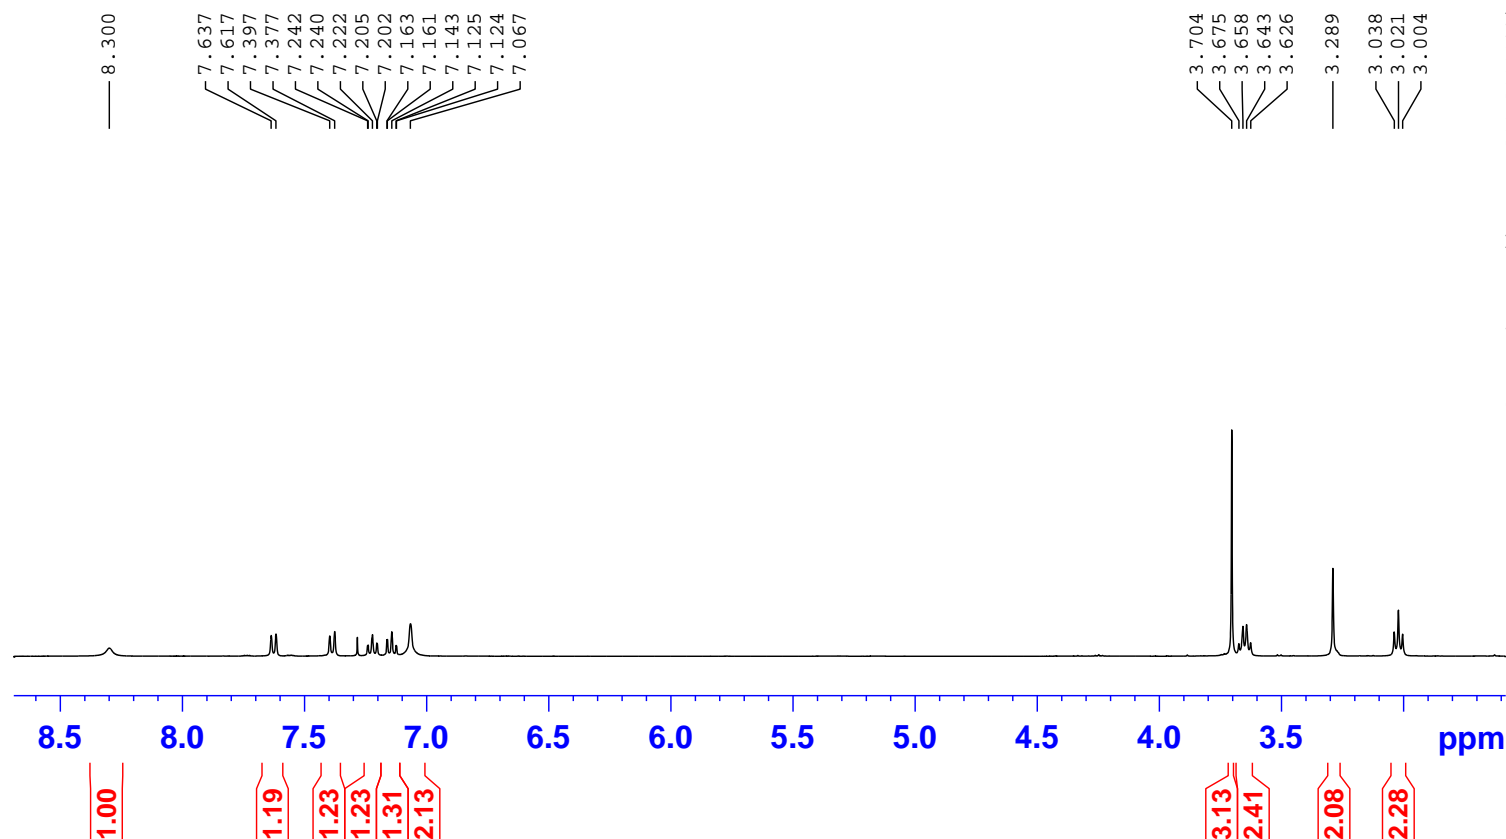

NAME HB2-7 C 12mg  
EXPNO 1  
PROCNO 1  
Date\_ 20200801  
Time 9.01  
INSTRUM spect  
PROBHD 5 mm PABBO BB-  
PULPROG zg30  
TD 65536  
SOLVENT CDCl3  
NS 18  
DS 2  
SWH 8012.820 Hz  
FIDRES 0.122266 Hz  
AQ 4.0894966 sec  
RG 161  
DW 62.400 usec  
DE 6.50 usec  
TE 296.2 K  
D1 1.00000000 sec  
TD0 1

===== CHANNEL f1 =====  
SFO1 400.1324710 MHz  
NUC1 1H  
P1 13.90 usec  
SI 32768  
SF 400.1300000 MHz  
WDW EM  
SSB 0  
LB 0.30 Hz  
GB 0  
PC 1.00

Figure S28. <sup>1</sup>H NMR spectrum of 7.

HB2-7 C 12mg C

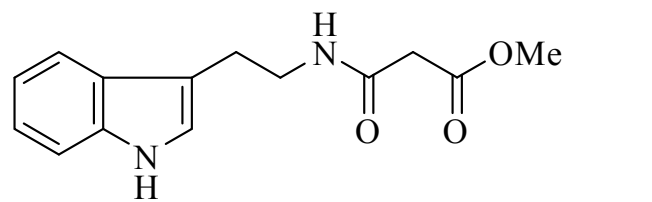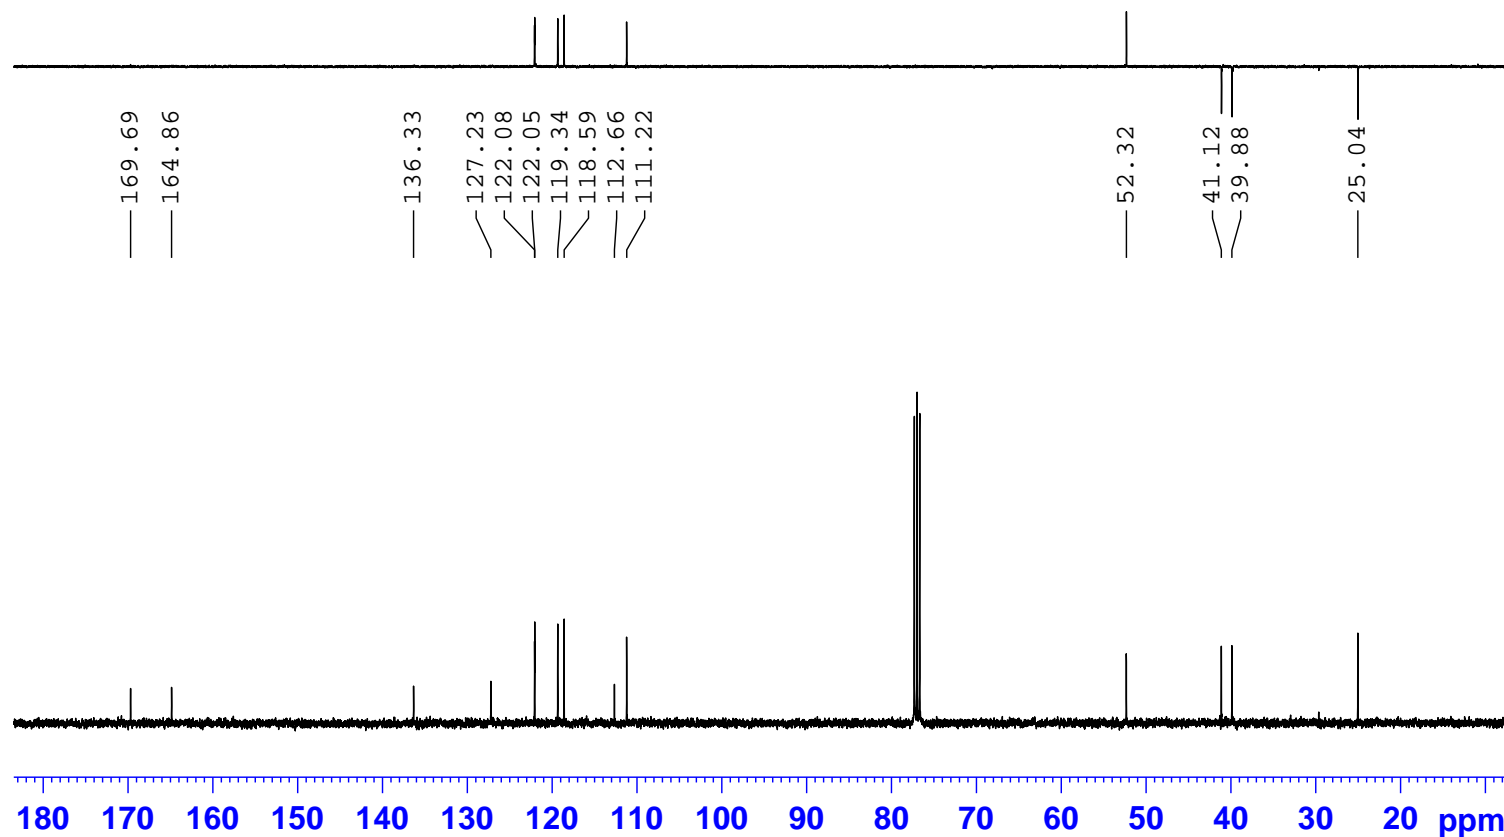

NAME HB2-7 C 12mg  
EXPNO 2  
PROCNO 1  
Date\_ 20200801  
Time 9.04  
INSTRUM spect  
PROBHD 5 mm PABBO BB-  
PULPROG zgpg30  
TD 65536  
SOLVENT CDCl3  
NS 102  
DS 4  
SWH 24038.461 Hz  
FIDRES 0.366798 Hz  
AQ 1.3631988 sec  
RG 203  
DW 20.800 usec  
DE 6.50 usec  
TE 296.4 K  
D1 2.00000000 sec  
D11 0.03000000 sec  
TD0 1

===== CHANNEL f1 =====  
SF01 100.6228293 MHz  
NUC1 13C  
P1 12.37 usec  
SI 32768  
SF 100.6127766 MHz  
WDW EM  
SSB 0  
LB 1.00 Hz  
GB 0  
PC 1.40

Figure S29. <sup>13</sup>C NMR spectrum of 7.

HB5-6 M 10mg H

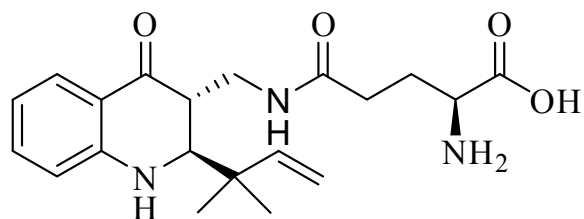

7.521  
7.504  
7.501  
7.254  
7.250  
7.233  
7.216  
7.212  
6.726  
6.705  
6.512  
6.493  
6.475

5.733  
5.706  
5.689  
5.662

4.971  
4.952  
4.926

3.604  
3.591  
3.397  
3.377  
3.364  
3.343  
3.324  
2.828  
2.809  
2.790  
2.418  
2.401  
2.384  
2.085  
2.071

0.998  
0.940

NAME HB5-6 M 10mg  
EXPNO 1  
PROCNO 1  
Date\_ 20200712  
Time 13.46  
INSTRUM spect  
PROBHD 5 mm PABBO BB-  
PULPROG zg30  
TD 65536  
SOLVENT MeOD  
NS 20  
DS 2  
SWH 8012.820 Hz  
FIDRES 0.122266 Hz  
AQ 4.0894966 sec  
RG 144  
DW 62.400 usec  
DE 6.50 usec  
TE 299.6 K  
D1 1.00000000 sec  
TD0 1

===== CHANNEL f1 =====  
SFO1 400.1324710 MHz  
NUC1 1H  
P1 13.90 usec  
SI 32768  
SF 400.1300117 MHz  
WDW EM  
SSB 0  
LB 0.30 Hz  
GB 0  
PC 1.00

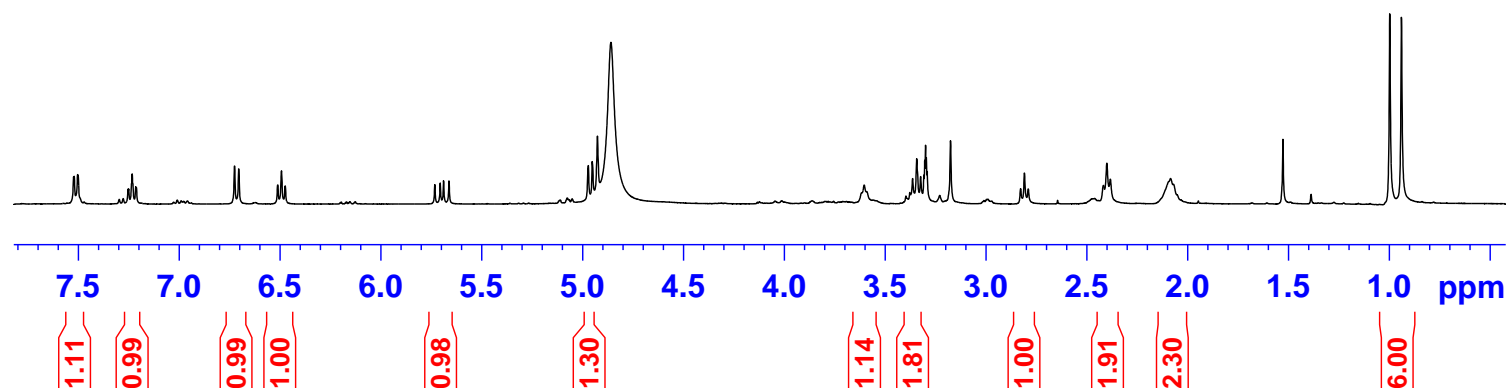

Figure S30. <sup>1</sup>H NMR spectrum of **8**.



HB5-6 M 10mg C

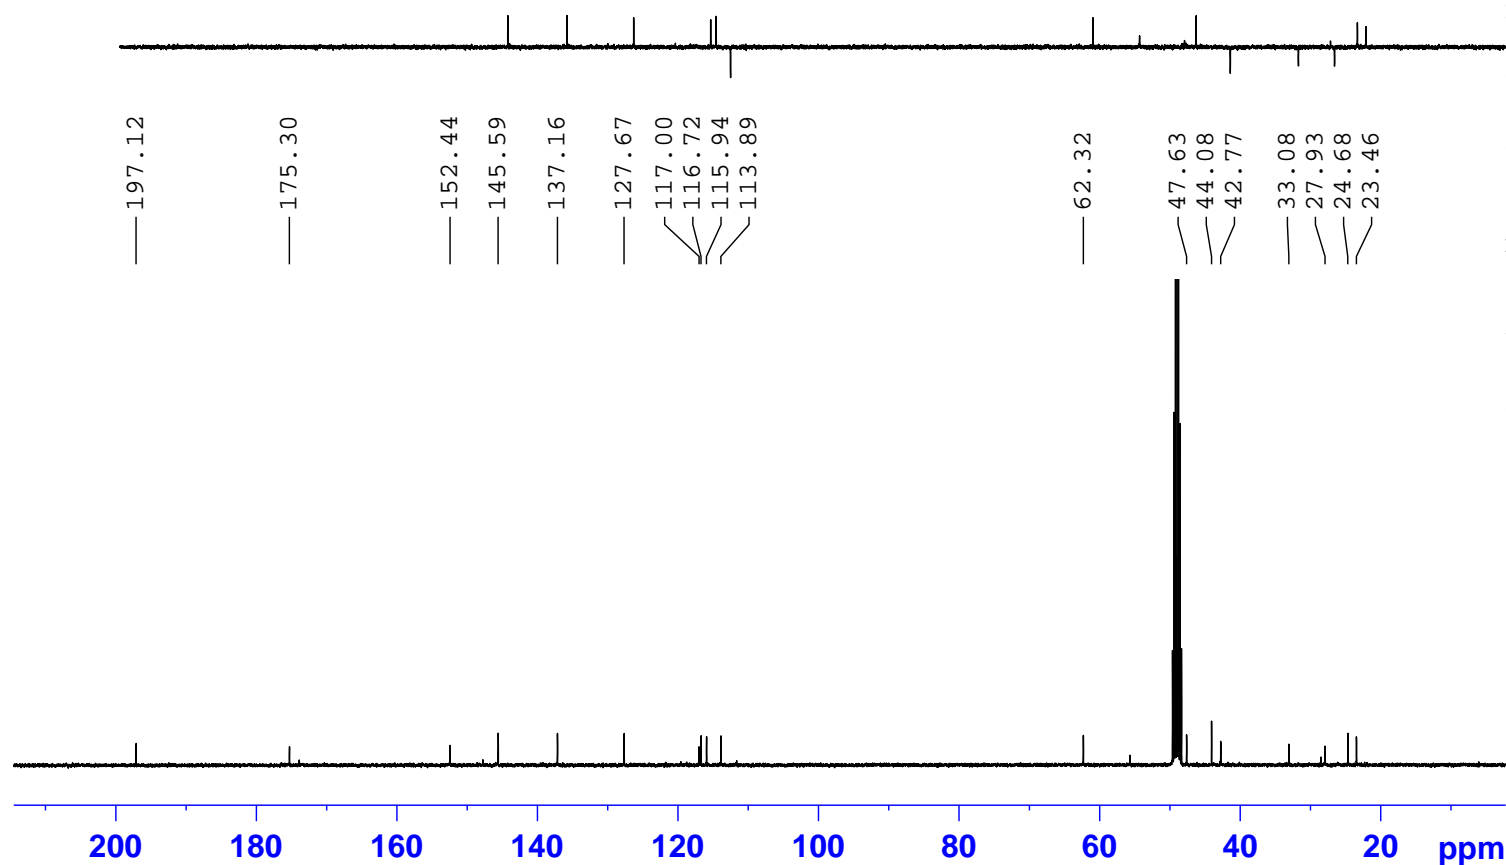

NAME HB5-6 M 10mg  
EXPNO 2  
PROCNO 1  
Date\_ 20200712  
Time 13.48  
INSTRUM spect  
PROBHD 5 mm PABBO BB-  
PULPROG zgpg30  
TD 65536  
SOLVENT MeOD  
NS 424  
DS 4  
SWH 24038.461 Hz  
FIDRES 0.366798 Hz  
AQ 1.3631988 sec  
RG 203  
DW 20.800 usec  
DE 6.50 usec  
TE 299.7 K  
D1 2.00000000 sec  
D11 0.03000000 sec  
TD0 1

===== CHANNEL f1 =====  
SFO1 100.6228293 MHz  
NUC1 13C  
P1 12.37 usec  
SI 32768  
SF 100.6126303 MHz  
WDW EM  
SSB 0  
LB 1.00 Hz  
GB 0  
PC 1.40

Figure S31.  $^{13}\text{C}$  NMR spectrum of **8**.

HB2-8 C 2mg H

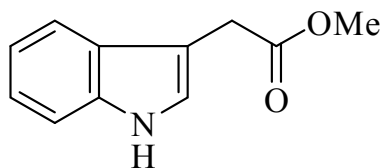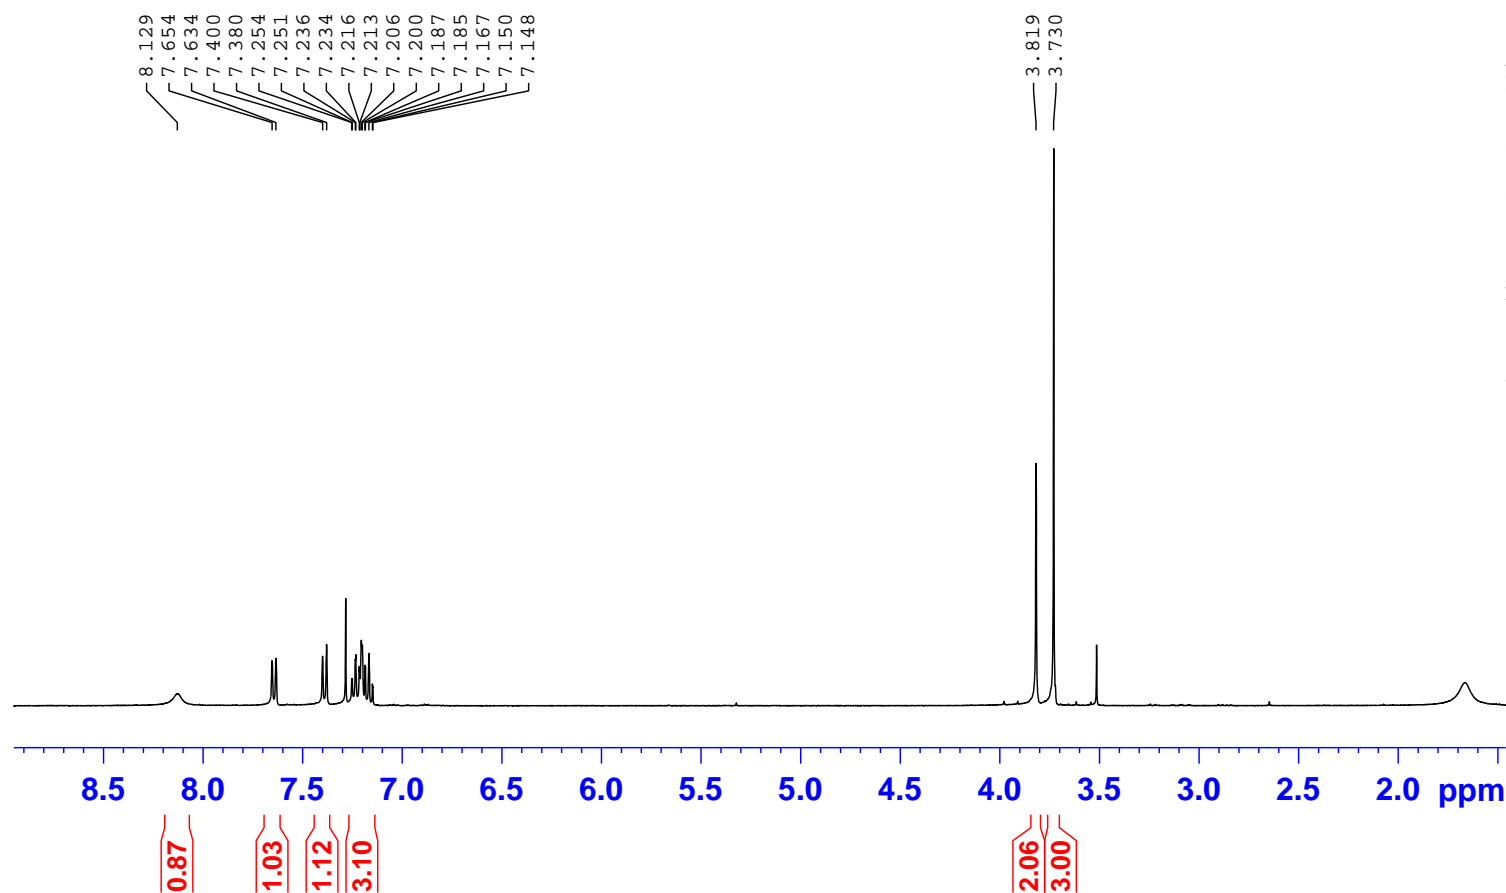

NAME HB2-8 C 2mg  
EXPNO 1  
PROCNO 1  
Date\_ 20200801  
Time 10.41  
INSTRUM spect  
PROBHD 5 mm PABBO BB-  
PULPROG zg30  
TD 65536  
SOLVENT CDCl3  
NS 15  
DS 2  
SWH 8012.820 Hz  
FIDRES 0.122266 Hz  
AQ 4.0894966 sec  
RG 203  
DW 62.400 usec  
DE 6.50 usec  
TE 296.2 K  
D1 1.00000000 sec  
TD0 1

===== CHANNEL f1 =====  
SFO1 400.1324710 MHz  
NUC1 1H  
P1 13.90 usec  
SI 32768  
SF 400.1300000 MHz  
WDW EM  
SSB 0  
LB 0.30 Hz  
GB 0  
PC 1.00

Figure S32. <sup>1</sup>H NMR spectrum of **9**.

HB2-8 C 2mg C



NAME HB2-8 C 2mg  
EXPNO 2  
PROCNO 1  
Date\_ 20200801  
Time 10.43  
INSTRUM spect  
PROBHD 5 mm PABBO BB-  
PULPROG zgpg30  
TD 65536  
SOLVENT CDCl3  
NS 530  
DS 4  
SWH 24038.461 Hz  
FIDRES 0.366798 Hz  
AQ 1.3631988 sec  
RG 203  
DW 20.800 usec  
DE 6.50 usec  
TE 296.4 K  
D1 2.00000000 sec  
D11 0.03000000 sec  
TD0 1

===== CHANNEL f1 =====  
SFO1 100.6228293 MHz  
NUC1 13C  
P1 12.37 usec  
SI 32768  
SF 100.6127685 MHz  
WDW EM  
SSB 0  
LB 1.00 Hz  
GB 0  
PC 1.40

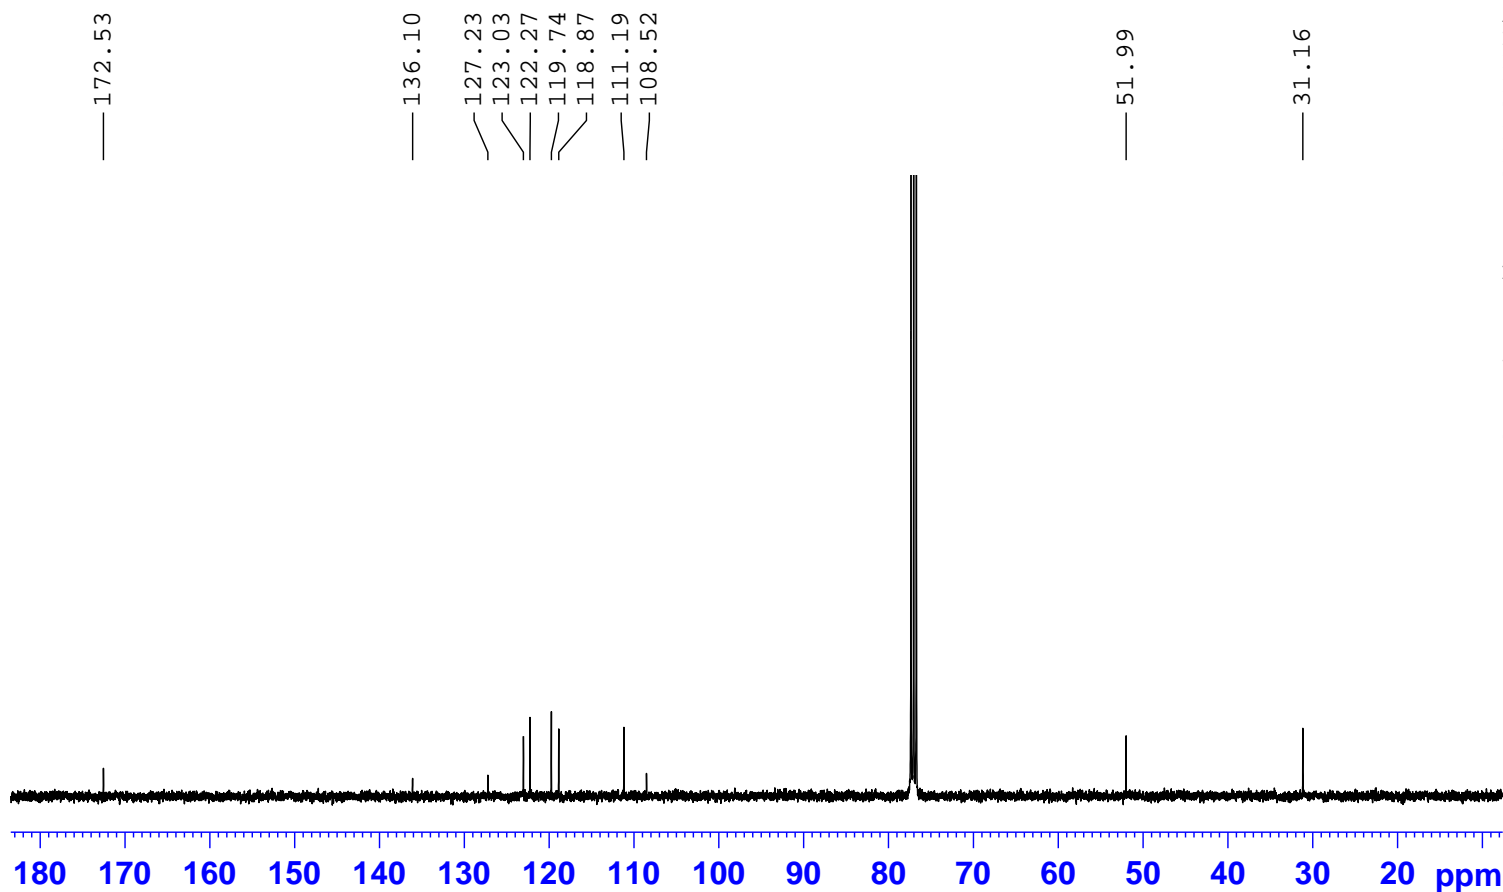

Figure S33.  $^{13}\text{C}$  NMR spectrum of **9**.

HB-C14 M 127mg H

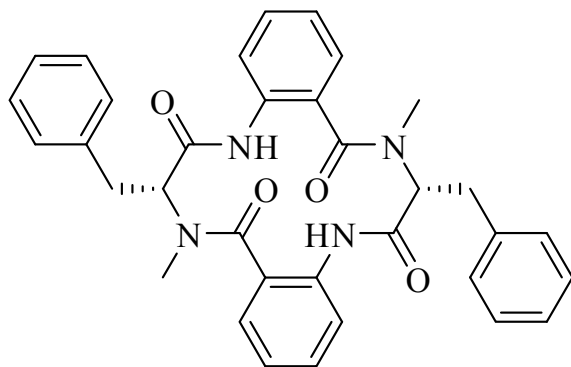

NAME HB-C14 M 127mg  
 EXPNO 1  
 PROCNO 1  
 Date\_ 20200910  
 Time 20.24  
 INSTRUM spect  
 PROBHD 5 mm PABBO BB-  
 PULPROG zg30  
 TD 65536  
 SOLVENT MeOD  
 NS 10  
 DS 2  
 SWH 8012.820 Hz  
 FIDRES 0.122266 Hz  
 AQ 4.0894966 sec  
 RG 32  
 DW 62.400 usec  
 DE 6.50 usec  
 TE 296.4 K  
 D1 1.00000000 sec  
 TD0 1

===== CHANNEL f1 =====  
 SFO1 400.1324710 MHz  
 NUC1 1H  
 P1 13.90 usec  
 SI 32768  
 SF 400.1300113 MHz  
 WDW EM  
 SSB 0  
 LB 0.30 Hz  
 GB 0  
 PC 1.00

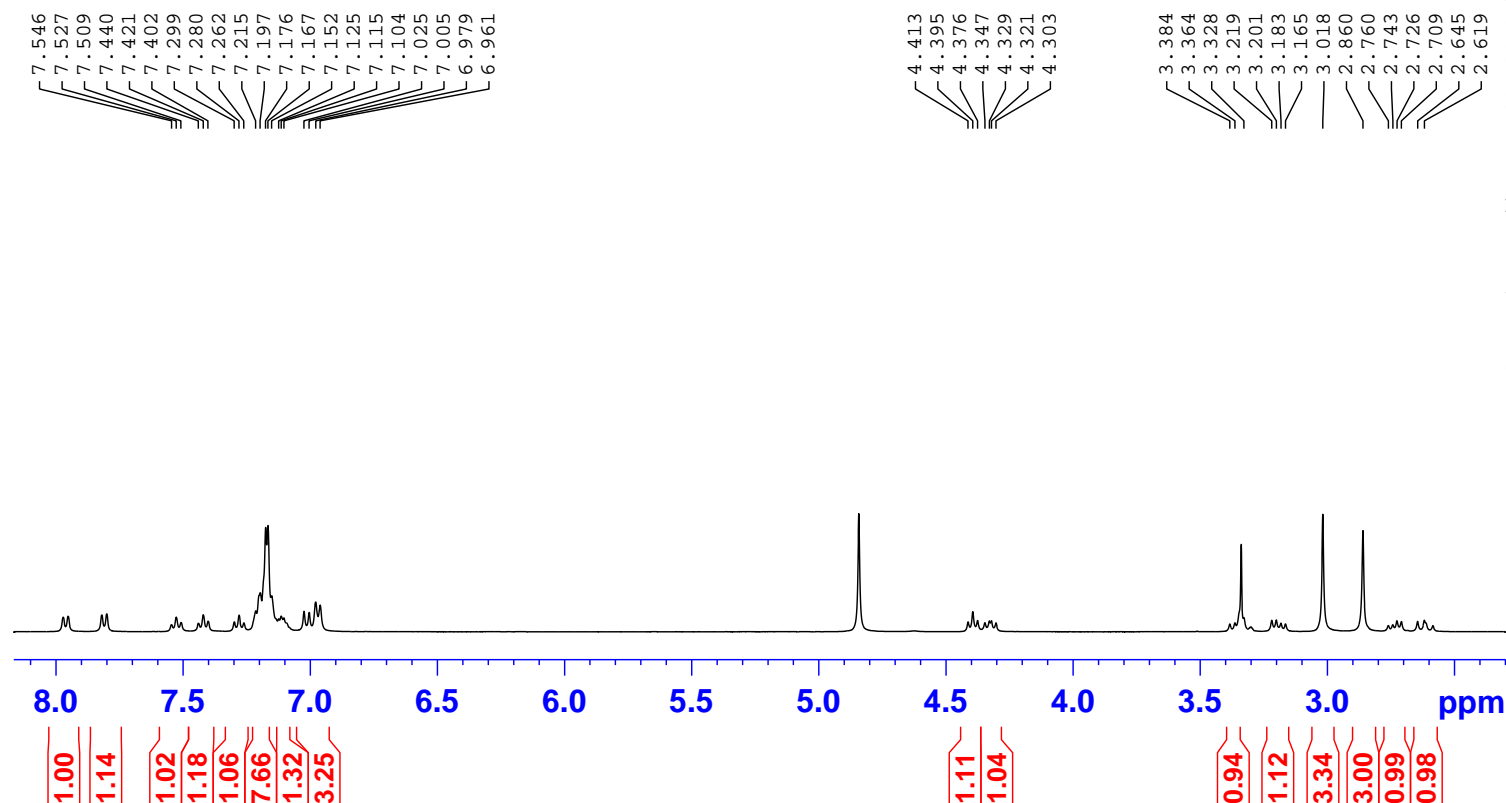

Figure S34. <sup>1</sup>H NMR spectrum of **10**.

HB-C14 M 127mg C

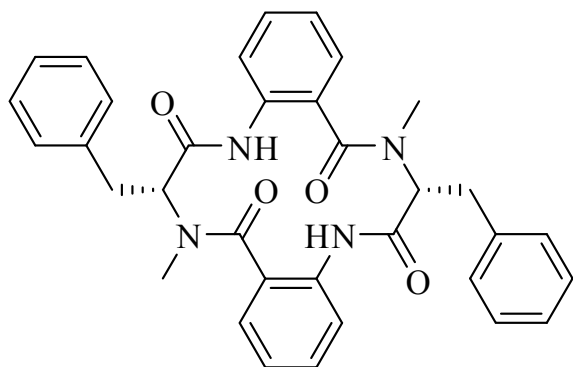

NAME HB-C14 M 127mg  
EXPNO 2  
PROCNO 1  
Date\_ 20200910  
Time 20.27  
INSTRUM spect  
PROBHD 5 mm PABBO BB-  
PULPROG zgpg30  
TD 65536  
SOLVENT MeOD  
NS 46  
DS 4  
SWH 24038.461 Hz  
FIDRES 0.366798 Hz  
AQ 1.3631988 sec  
RG 203  
DW 20.800 usec  
DE 6.50 usec  
TE 296.9 K  
D1 2.00000000 sec  
D11 0.03000000 sec  
TD0 1

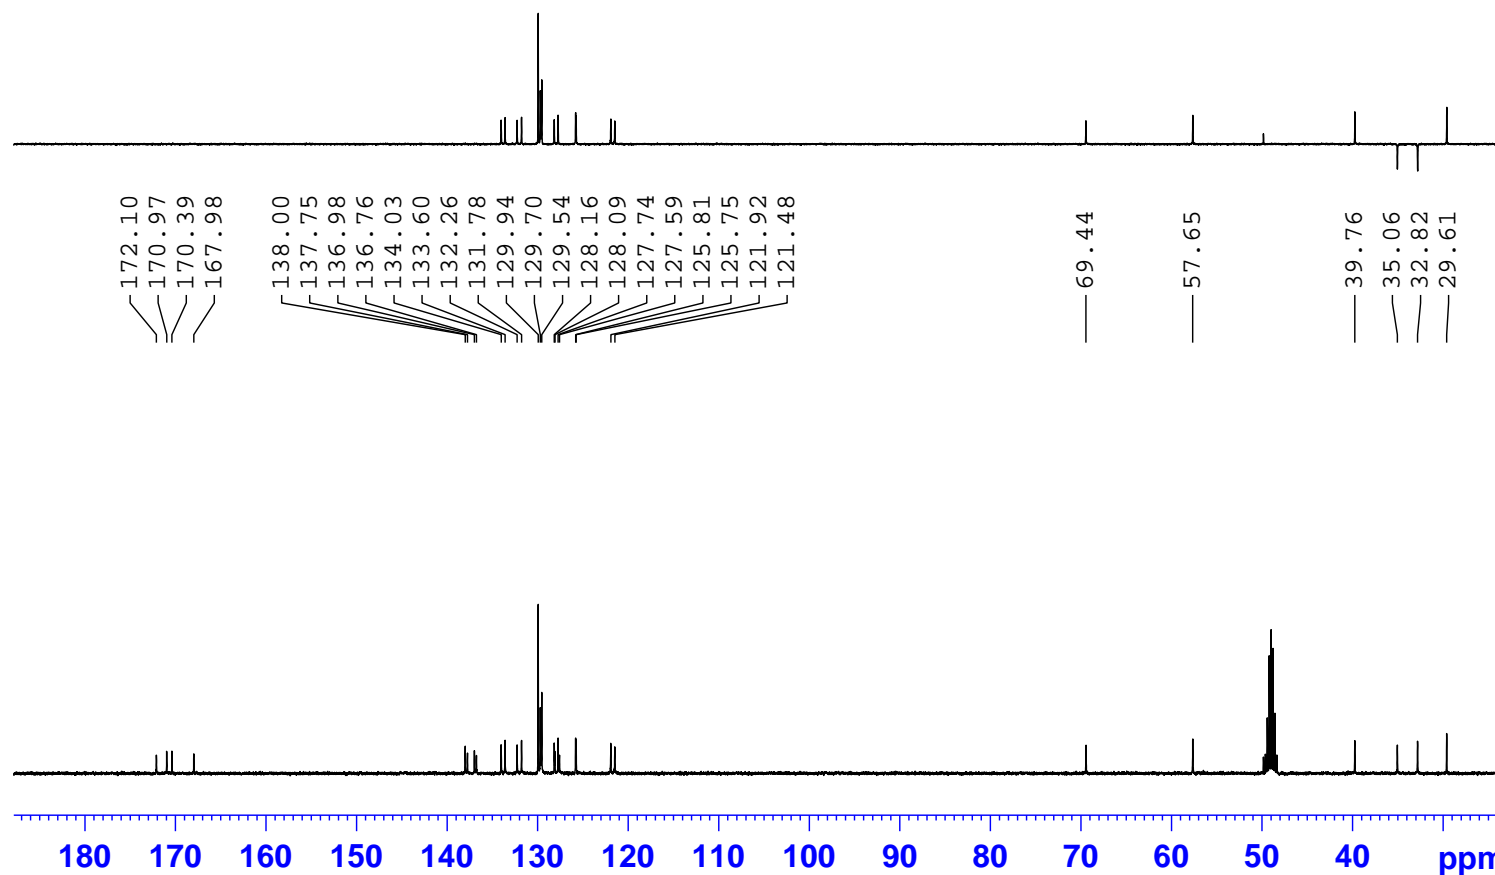

===== CHANNEL f1 =====  
SF01 100.6228293 MHz  
NUC1 13C  
P1 12.37 usec  
SI 32768  
SF 100.6126497 MHz  
WDW EM  
SSB 0  
LB 1.00 Hz  
GB 0  
PC 1.40

Figure S35. <sup>13</sup>C NMR spectrum of **10**.

HB-C8 M 2mg H

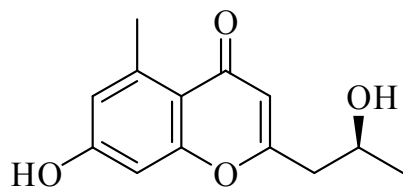

NAME HB-C8 M 2mg  
EXPNO 1  
PROCNO 1  
Date\_ 20200903  
Time 20.56  
INSTRUM spect  
PROBHD 5 mm PABBO BB-  
PULPROG zg30  
TD 65536  
SOLVENT MeOD  
NS 20  
DS 2  
SWH 8012.820 Hz  
FIDRES 0.122266 Hz  
AQ 4.0894966 sec  
RG 203  
DW 62.400 usec  
DE 6.50 usec  
TE 296.6 K  
D1 1.00000000 sec  
TD0 1

===== CHANNEL f1 =====  
SFO1 400.1324710 MHz  
NUC1 1H  
P1 13.90 usec  
SI 32768  
SF 400.1300117 MHz  
WDW EM  
SSB 0  
LB 0.30 Hz  
GB 0  
PC 1.00

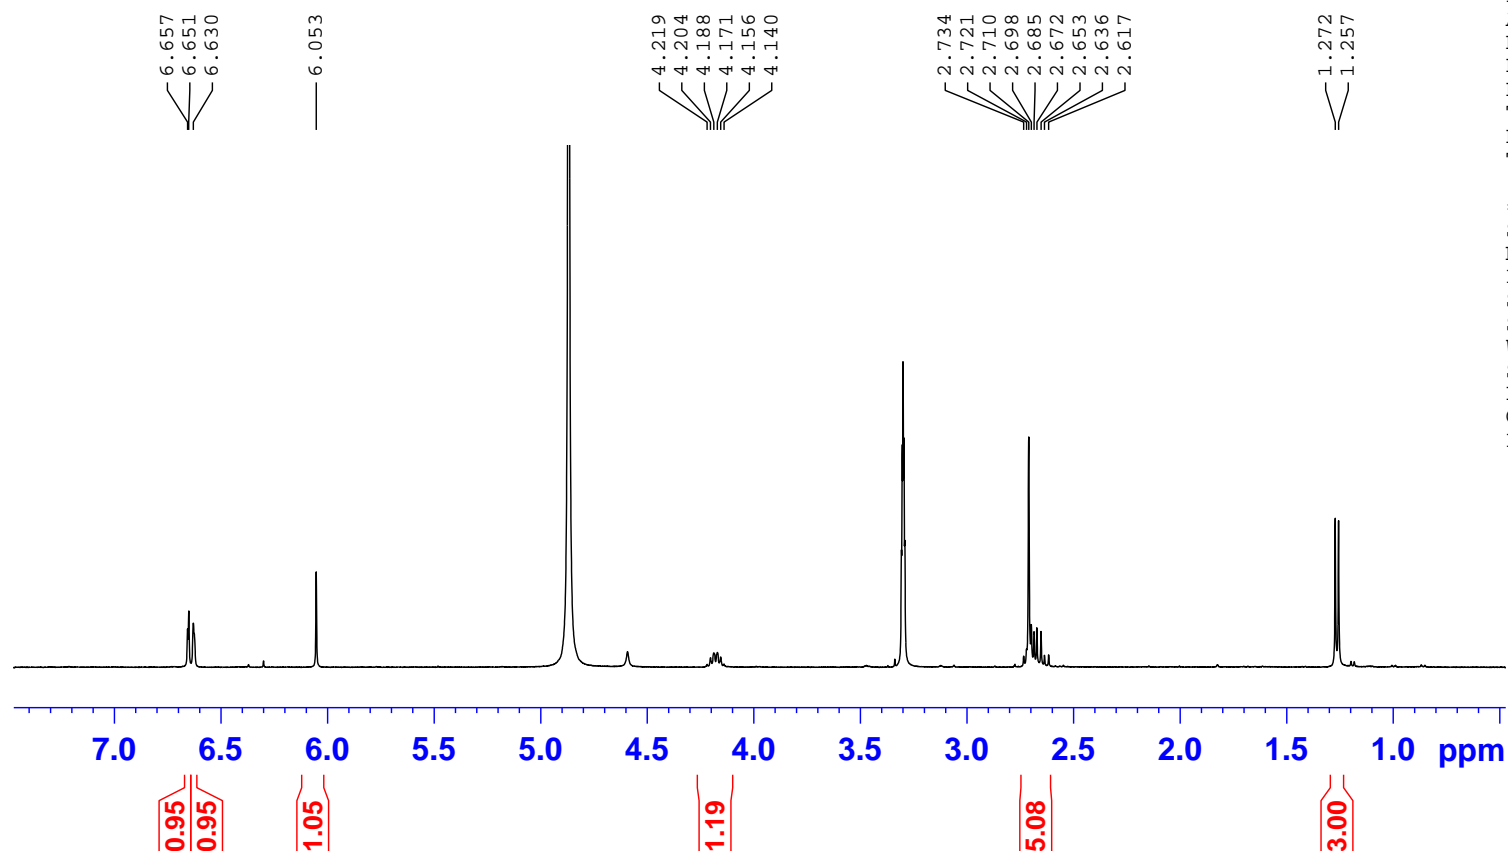

Figure S36. <sup>1</sup>H NMR spectrum of **11**.

HB-C8 M 2mg C

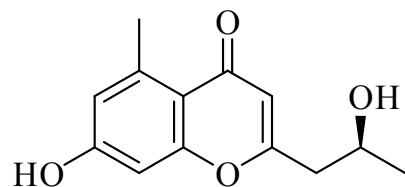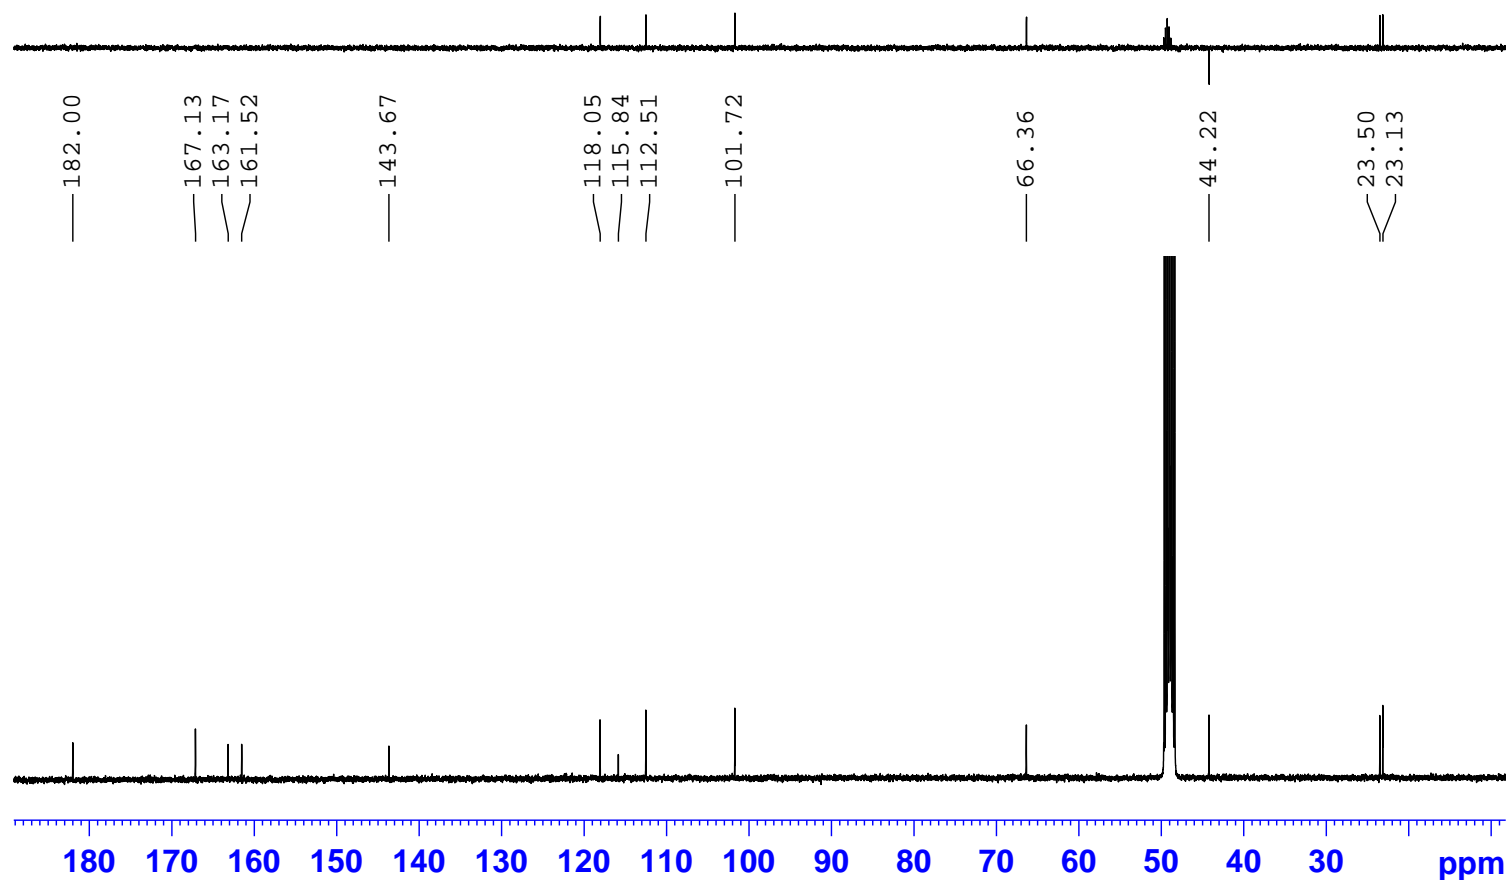

NAME HB-C8 M 2mg  
EXPNO 2  
PROCNO 1  
Date\_ 20200903  
Time 21.00  
INSTRUM spect  
PROBHD 5 mm PABBO BB-  
PULPROG zgpg30  
TD 65536  
SOLVENT MeOD  
NS 10240  
DS 4  
SWH 24038.461 Hz  
FIDRES 0.366798 Hz  
AQ 1.3631988 sec  
RG 203  
DW 20.800 usec  
DE 6.50 usec  
TE 296.7 K  
D1 2.00000000 sec  
D11 0.03000000 sec  
TD0 1

===== CHANNEL f1 =====  
SF01 100.6228293 MHz  
NUC1 13C  
P1 12.37 usec  
SI 32768  
SF 100.6126266 MHz  
WDW EM  
SSB 0  
LB 1.00 Hz  
GB 0  
PC 1.40

Figure S37. <sup>13</sup>C NMR spectrum of **11**.

HB2-3 M 2mg H

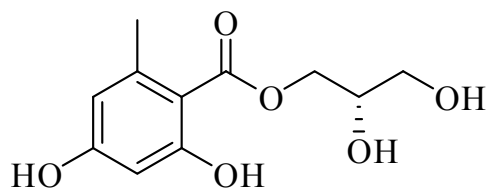

NAME HB2-3 M 2mg  
EXPNO 1  
PROCNO 1  
Date\_ 20200726  
Time 17.36  
INSTRUM spect  
PROBHD 5 mm PABBO BB-  
PULPROG zg30  
TD 65536  
SOLVENT MeOD  
NS 24  
DS 2  
SWH 8012.820 Hz  
FIDRES 0.122266 Hz  
AQ 4.0894966 sec  
RG 203  
DW 62.400 usec  
DE 6.50 usec  
TE 296.2 K  
D1 1.00000000 sec  
TD0 1

===== CHANNEL f1 =====  
SFO1 400.1324710 MHz  
NUC1 1H  
P1 13.90 usec  
SI 32768  
SF 400.1300116 MHz  
WDW EM  
SSB 0  
LB 0.30 Hz  
GB 0  
PC 1.00

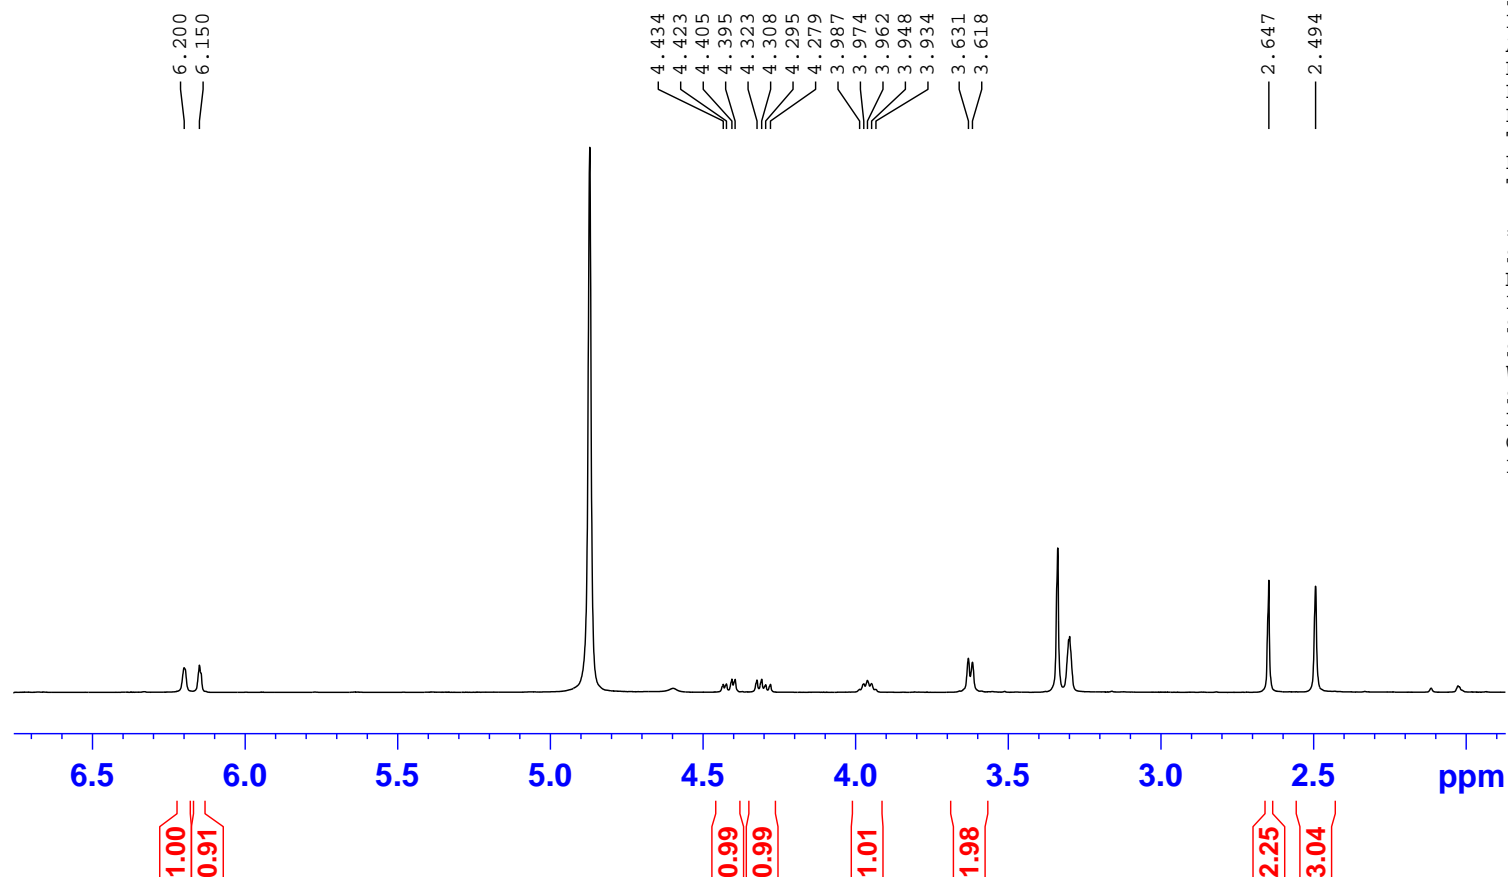

Figure S38. <sup>1</sup>H NMR spectrum of **12**.



HB2-3 M 2mg C

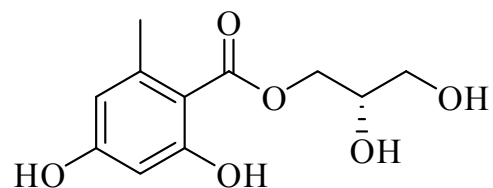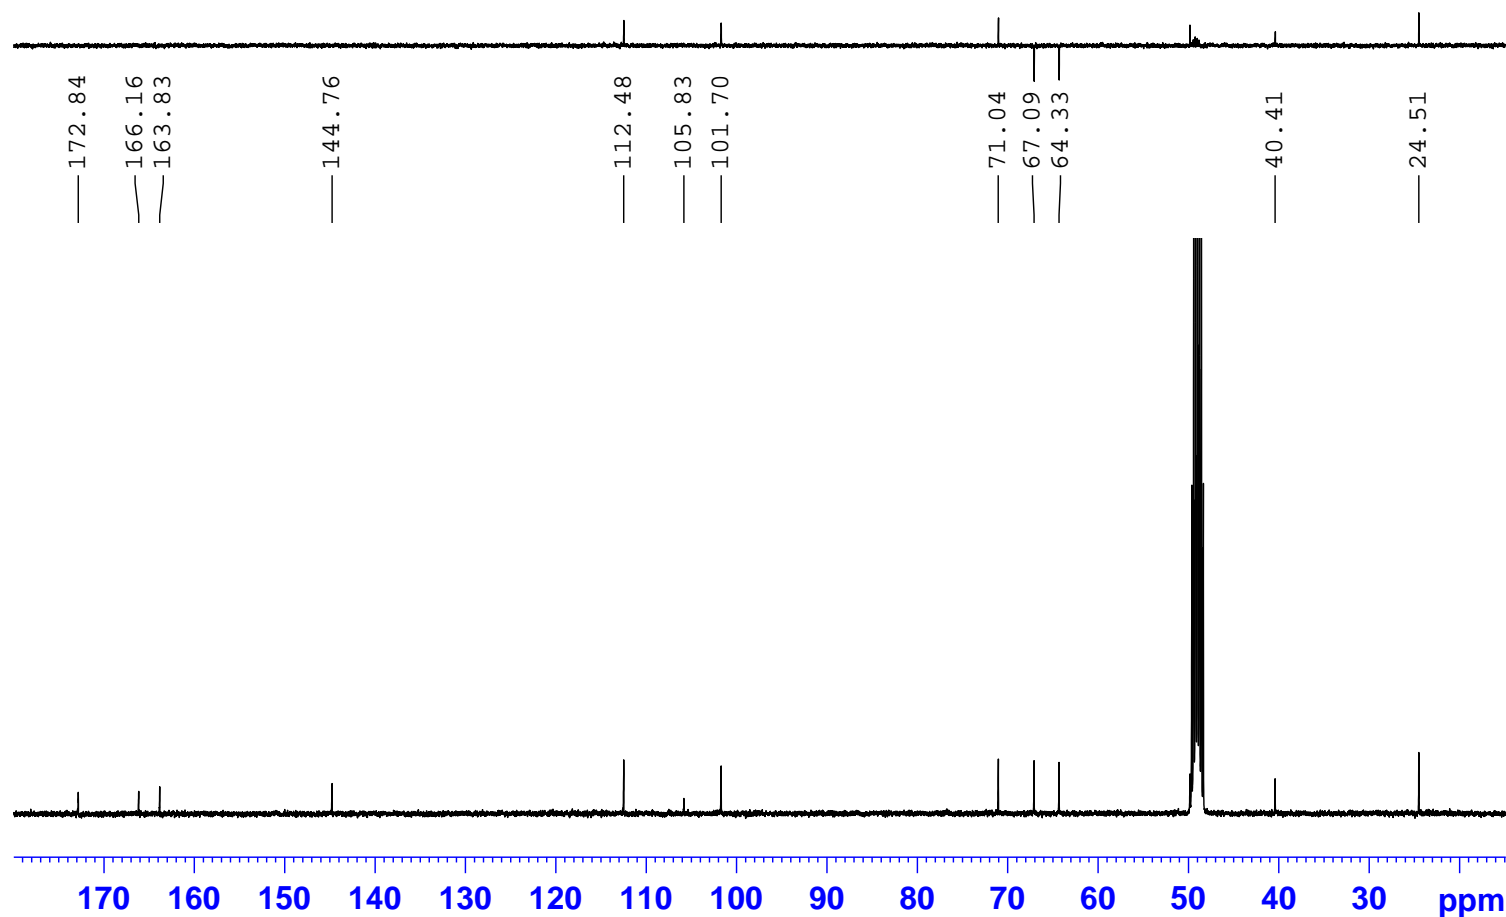

NAME HB2-3 M 2mg  
EXPNO 2  
PROCNO 1  
Date\_ 20200726  
Time 17.38  
INSTRUM spect  
PROBHD 5 mm PABBO BB-  
PULPROG zgpg30  
TD 65536  
SOLVENT MeOD  
NS 2767  
DS 4  
SWH 24038.461 Hz  
FIDRES 0.366798 Hz  
AQ 1.3631988 sec  
RG 203  
DW 20.800 usec  
DE 6.50 usec  
TE 296.4 K  
D1 2.00000000 sec  
D11 0.03000000 sec  
TD0 1

===== CHANNEL f1 =====  
SFO1 100.6228293 MHz  
NUC1 13C  
P1 12.37 usec  
SI 32768  
SF 100.6126282 MHz  
WDW EM  
SSB 0  
LB 1.00 Hz  
GB 0  
PC 1.40

Figure S39. <sup>13</sup>C NMR spectrum of **12**.

HB-1 D 16mg H

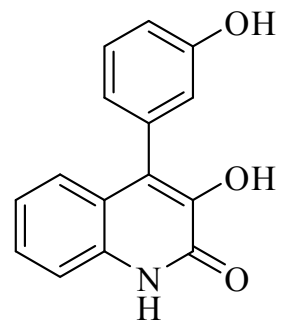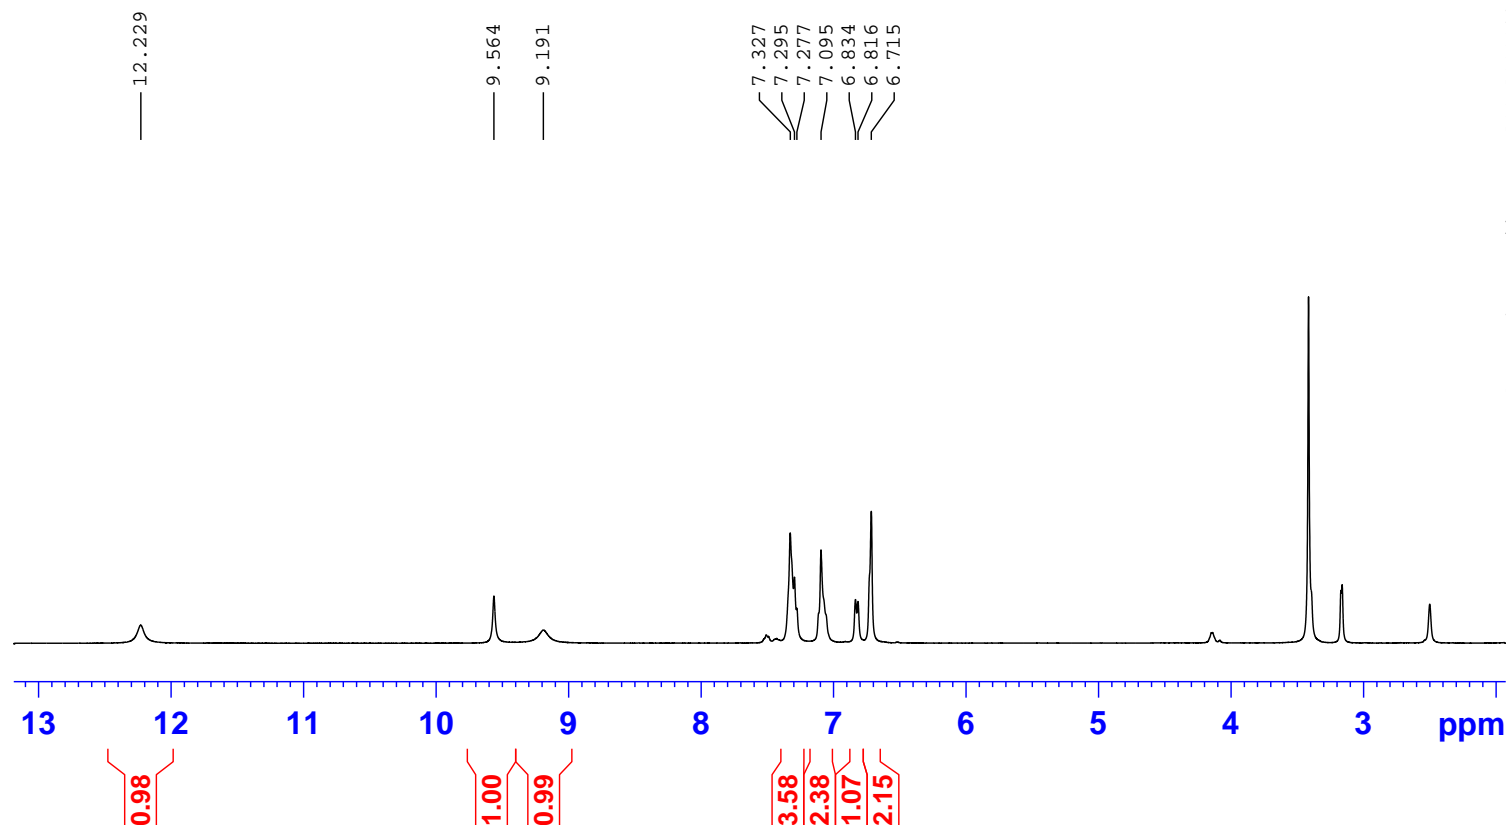

NAME HB1-1 D 16mg  
EXPNO 1  
PROCNO 1  
Date\_ 20191224  
Time 18.44  
INSTRUM spect  
PROBHD 5 mm PABBO BB-  
PULPROG zg30  
TD 65536  
SOLVENT DMSO  
NS 15  
DS 2  
SWH 8012.820 Hz  
FIDRES 0.122266 Hz  
AQ 4.0894966 sec  
RG 144  
DW 62.400 usec  
DE 6.50 usec  
TE 292.2 K  
D1 1.00000000 sec  
TD0 1

===== CHANNEL f1 =====  
SFO1 400.1324710 MHz  
NUC1 1H  
P1 13.90 usec  
SI 32768  
SF 400.1300030 MHz  
WDW EM  
SSB 0  
LB 0.30 Hz  
GB 0  
PC 1.00

Figure S40. <sup>1</sup>H NMR spectrum of **13**.

HB-1 D 16mg C



NAME HB1-1 D 16mg  
EXPNO 2  
PROCNO 1  
Date\_ 20191224  
Time 18.46  
INSTRUM spect  
PROBHD 5 mm PABBO BB-  
PULPROG zgpg30  
TD 65536  
SOLVENT DMSO  
NS 72  
DS 4  
SWH 24038.461 Hz  
FIDRES 0.366798 Hz  
AQ 1.3631988 sec  
RG 203  
DW 20.800 usec  
DE 6.50 usec  
TE 292.4 K  
D1 2.00000000 sec  
D11 0.03000000 sec  
TD0 1

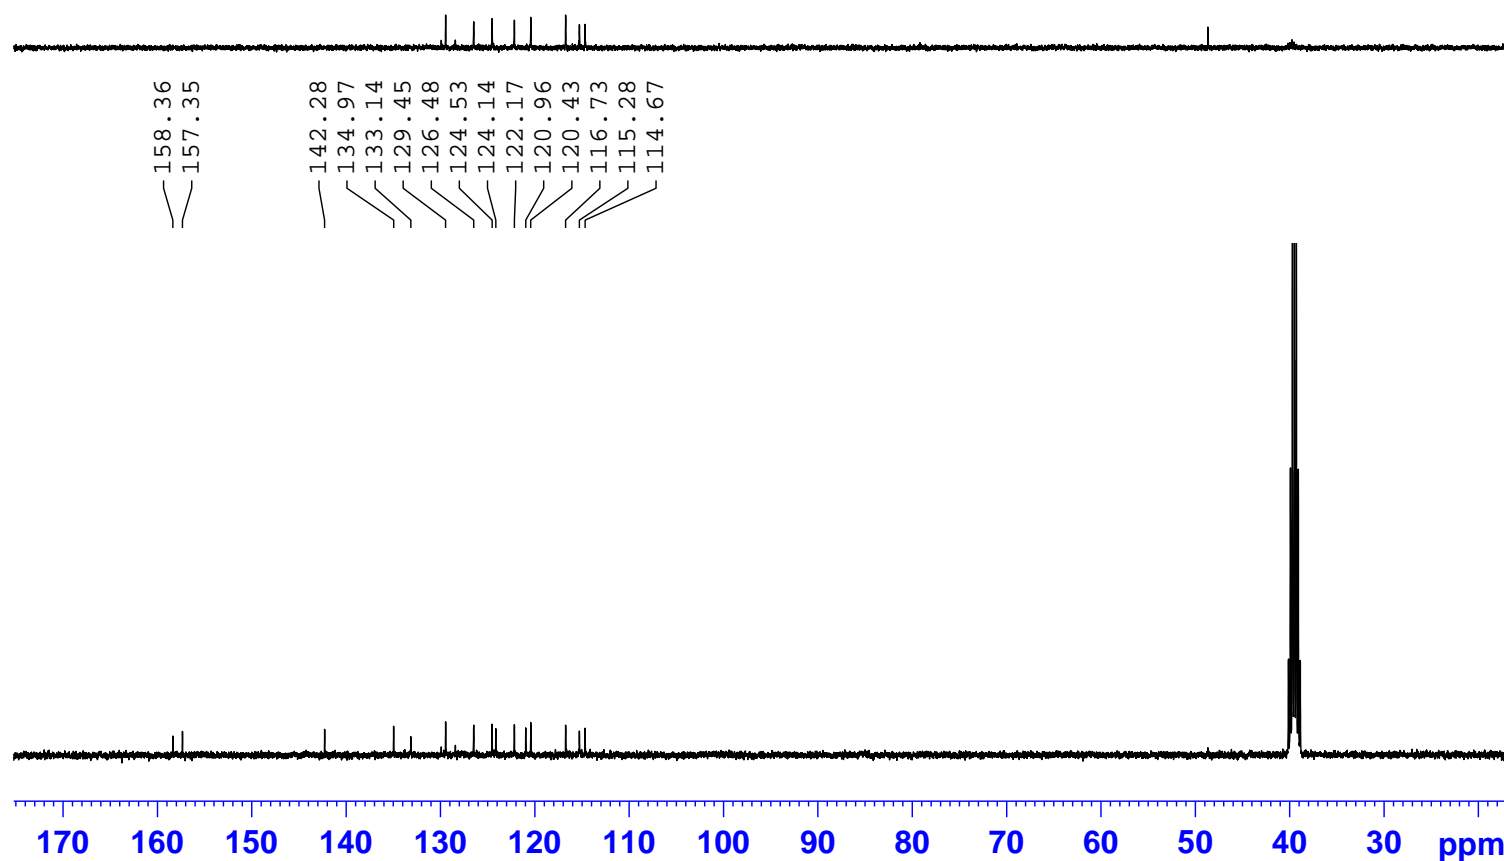

===== CHANNEL f1 =====  
SFO1 100.6228293 MHz  
NUC1 13C  
P1 12.37 usec  
SI 32768  
SF 100.6128095 MHz  
WDW EM  
SSB 0  
LB 1.00 Hz  
GB 0  
PC 1.40

Figure S41. <sup>13</sup>C NMR spectrum of **13**.

HB-2 D 50mg H

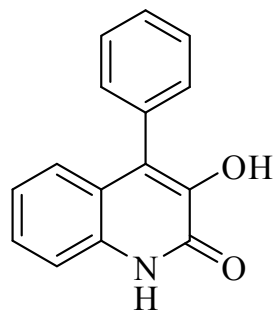

NAME HB1-2 D 50mg  
EXPNO 1  
PROCNO 1  
Date\_ 20191226  
Time 19.26  
INSTRUM spect  
PROBHD 5 mm PABBO BB-  
PULPROG zg30  
TD 65536  
SOLVENT DMSO  
NS 8  
DS 2  
SWH 8012.820 Hz  
FIDRES 0.122266 Hz  
AQ 4.0894966 sec  
RG 90.5  
DW 62.400 usec  
DE 6.50 usec  
TE 292.5 K  
D1 1.00000000 sec  
TD0 1

===== CHANNEL f1 =====  
SFO1 400.1324710 MHz  
NUC1 1H  
P1 13.90 usec  
SI 32768  
SF 400.1300028 MHz  
WDW EM  
SSB 0  
LB 0.30 Hz  
GB 0  
PC 1.00

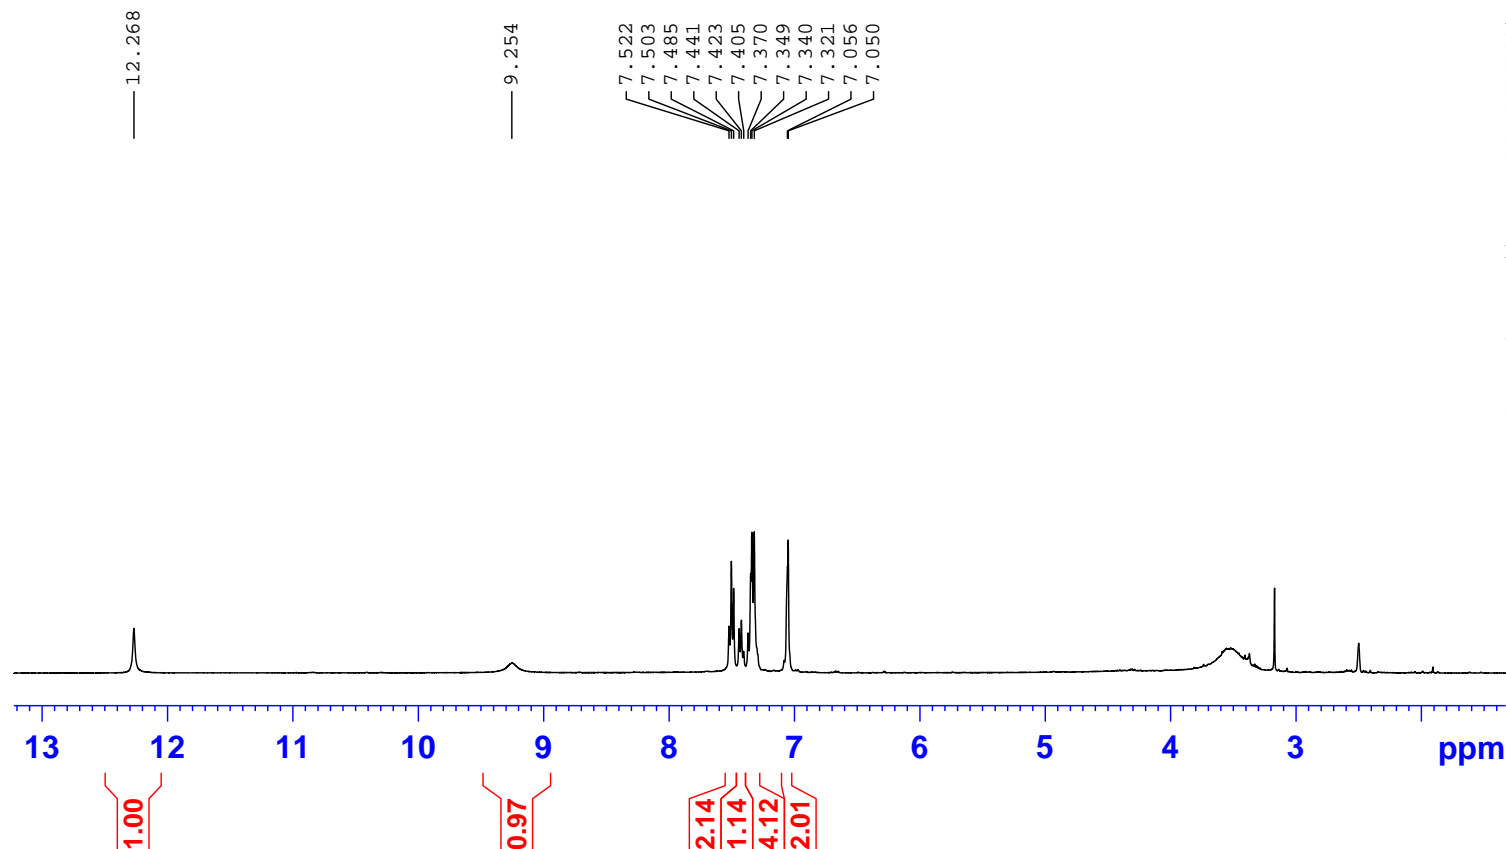

Figure S42. <sup>1</sup>H NMR spectrum of 14.

HB-2 D 50mg C



NAME HB1-2 D 50mg  
EXPNO 2  
PROCNO 1  
Date\_ 20191226  
Time 19.28  
INSTRUM spect  
PROBHD 5 mm PABBO BB-  
PULPROG zgpg30  
TD 65536  
SOLVENT DMSO  
NS 92  
DS 4  
SWH 24038.461 Hz  
FIDRES 0.366798 Hz  
AQ 1.3631988 sec  
RG 203  
DW 20.800 usec  
DE 6.50 usec  
TE 292.6 K  
D1 2.00000000 sec  
D11 0.03000000 sec  
TD0 1

===== CHANNEL f1 =====  
SFO1 100.6228293 MHz  
NUC1 13C  
P1 12.37 usec  
SI 32768  
SF 100.6128060 MHz  
WDW EM  
SSB 0  
LB 1.00 Hz  
GB 0  
PC 1.40

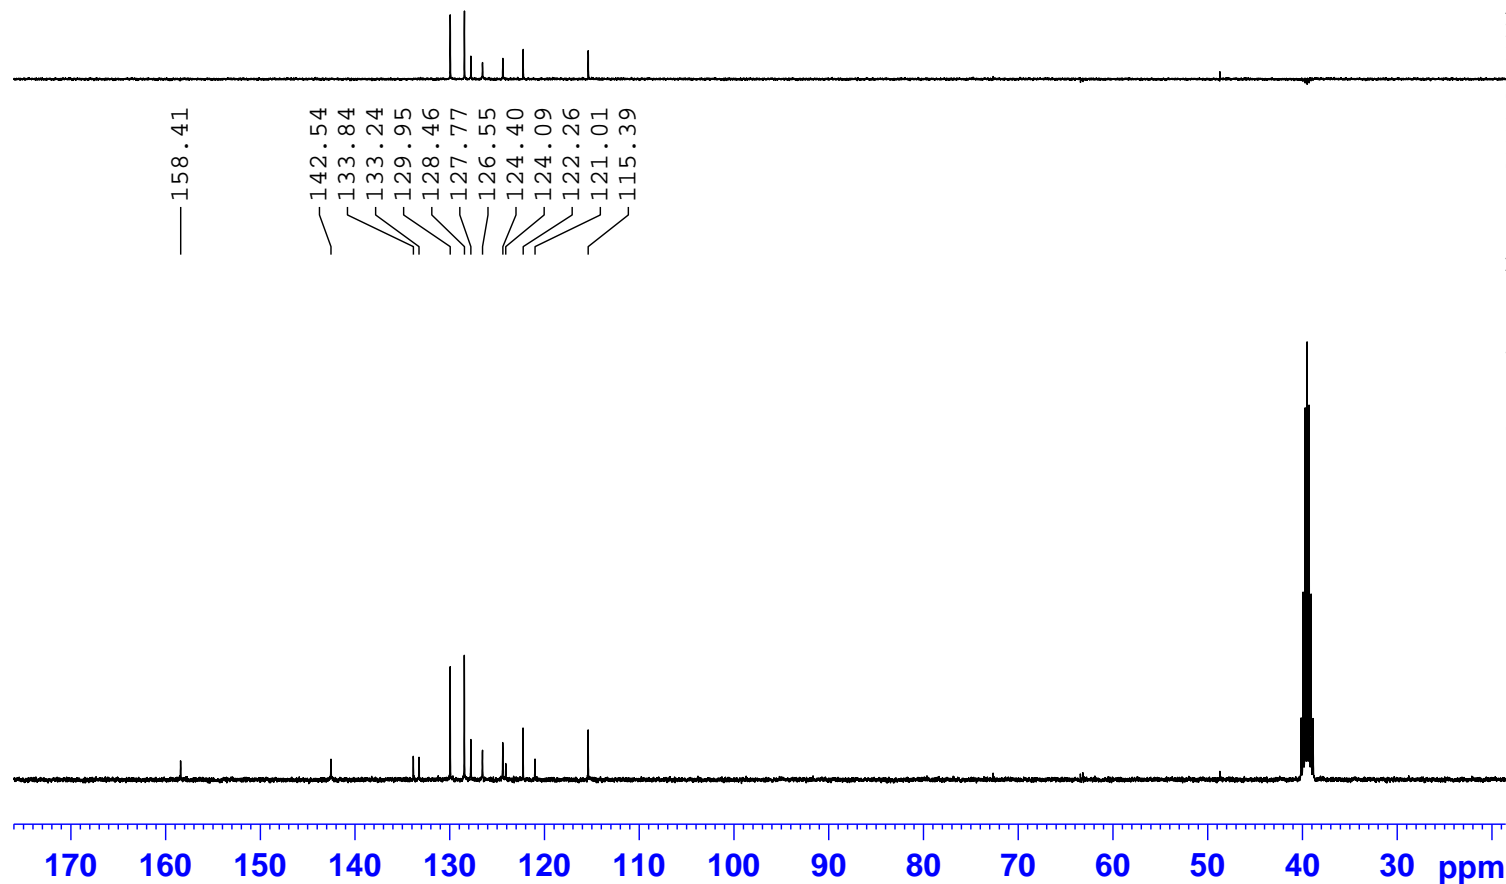

Figure S43. <sup>13</sup>C NMR spectrum of 14.

HB2-2 M 3mg H

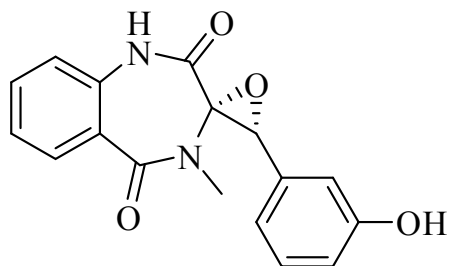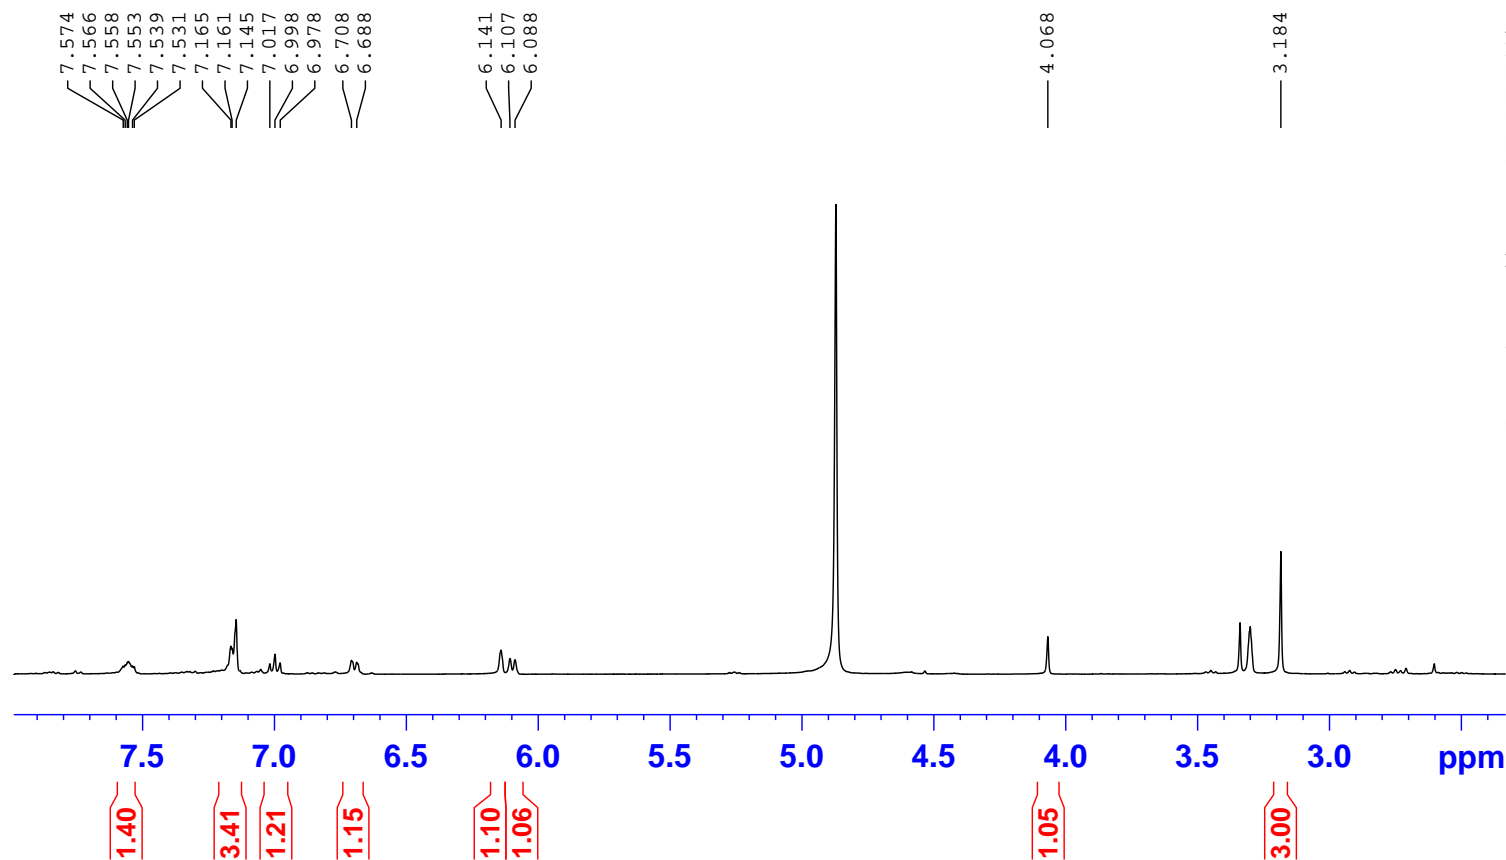

NAME HB2-2 M 3mg  
EXPNO 1  
PROCNO 1  
Date\_ 20200726  
Time 13.45  
INSTRUM spect  
PROBHD 5 mm PABBO BB-  
PULPROG zg30  
TD 65536  
SOLVENT MeOD  
NS 17  
DS 2  
SWH 8012.820 Hz  
FIDRES 0.122266 Hz  
AQ 4.0894966 sec  
RG 203  
DW 62.400 usec  
DE 6.50 usec  
TE 296.3 K  
D1 1.00000000 sec  
TD0 1

===== CHANNEL f1 =====  
SFO1 400.1324710 MHz  
NUC1 1H  
P1 13.90 usec  
SI 32768  
SF 400.1300113 MHz  
WDW EM  
SSB 0  
LB 0.30 Hz  
GB 0  
PC 1.00

Figure S44. <sup>1</sup>H NMR spectrum of **15**.

HB2-2 M 3mg C

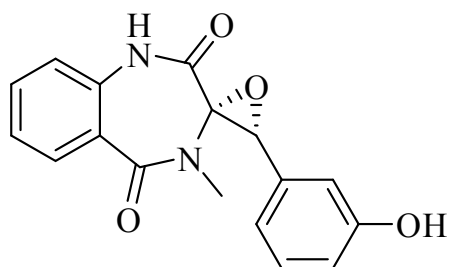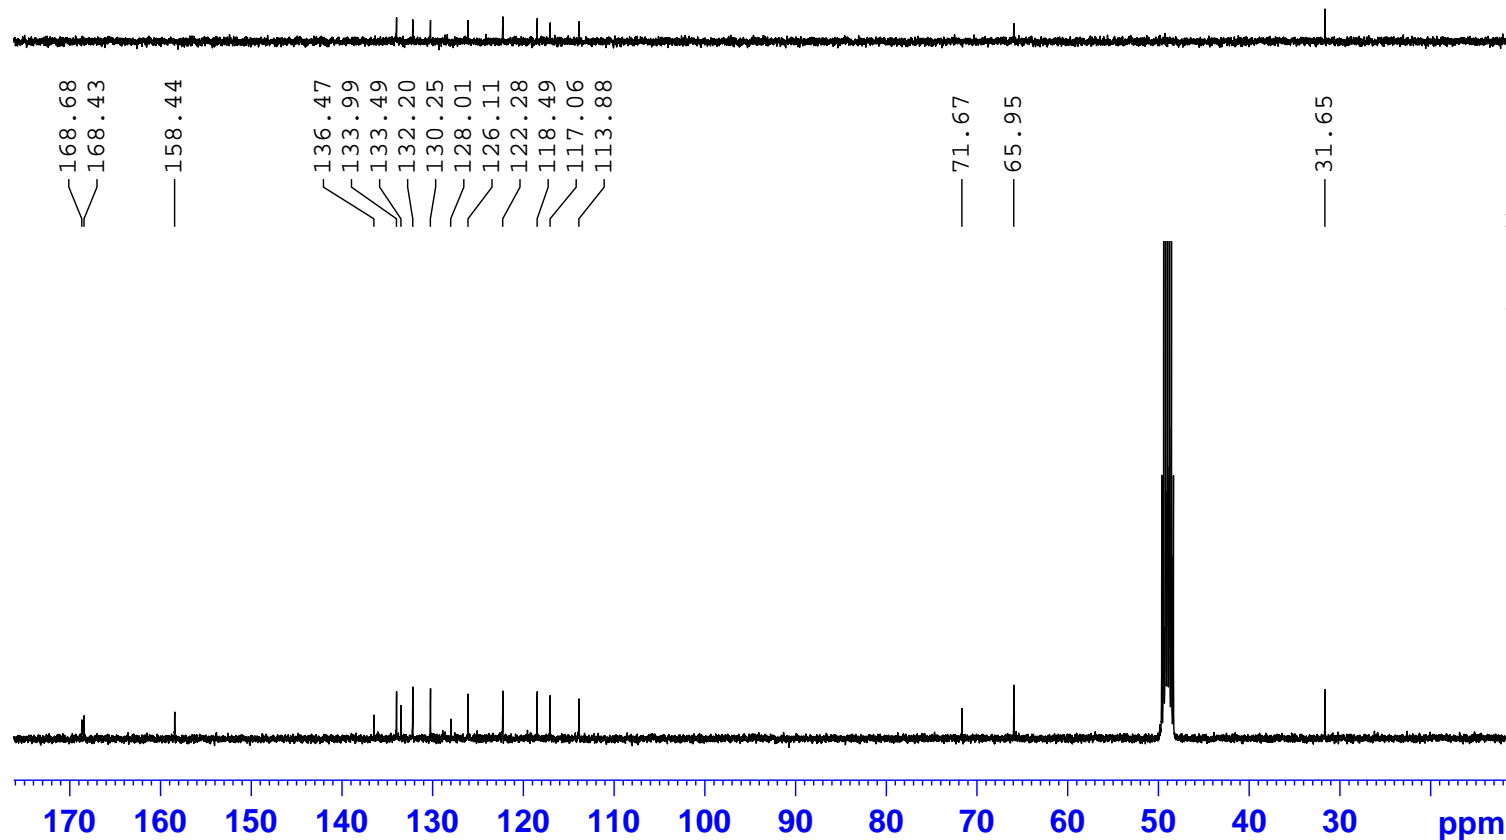

NAME HB2-2 M 3mg  
EXPNO 2  
PROCNO 1  
Date\_ 20200726  
Time 13.48  
INSTRUM spect  
PROBHD 5 mm PABBO BB-  
PULPROG zgpg30  
TD 65536  
SOLVENT MeOD  
NS 649  
DS 4  
SWH 24038.461 Hz  
FIDRES 0.366798 Hz  
AQ 1.3631988 sec  
RG 203  
DW 20.800 usec  
DE 6.50 usec  
TE 296.4 K  
D1 2.00000000 sec  
D11 0.03000000 sec  
TD0 1

===== CHANNEL f1 =====  
SFO1 100.6228293 MHz  
NUC1 13C  
P1 12.37 usec  
SI 32768  
SF 100.6126288 MHz  
WDW EM  
SSB 0  
LB 1.00 Hz  
GB 0  
PC 1.40

Figure S45. <sup>13</sup>C NMR spectrum of 15.

HB-C16 M 60mg H

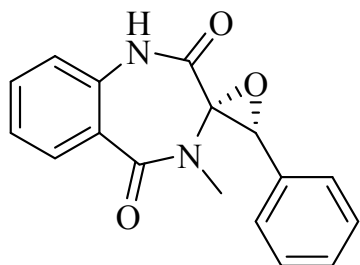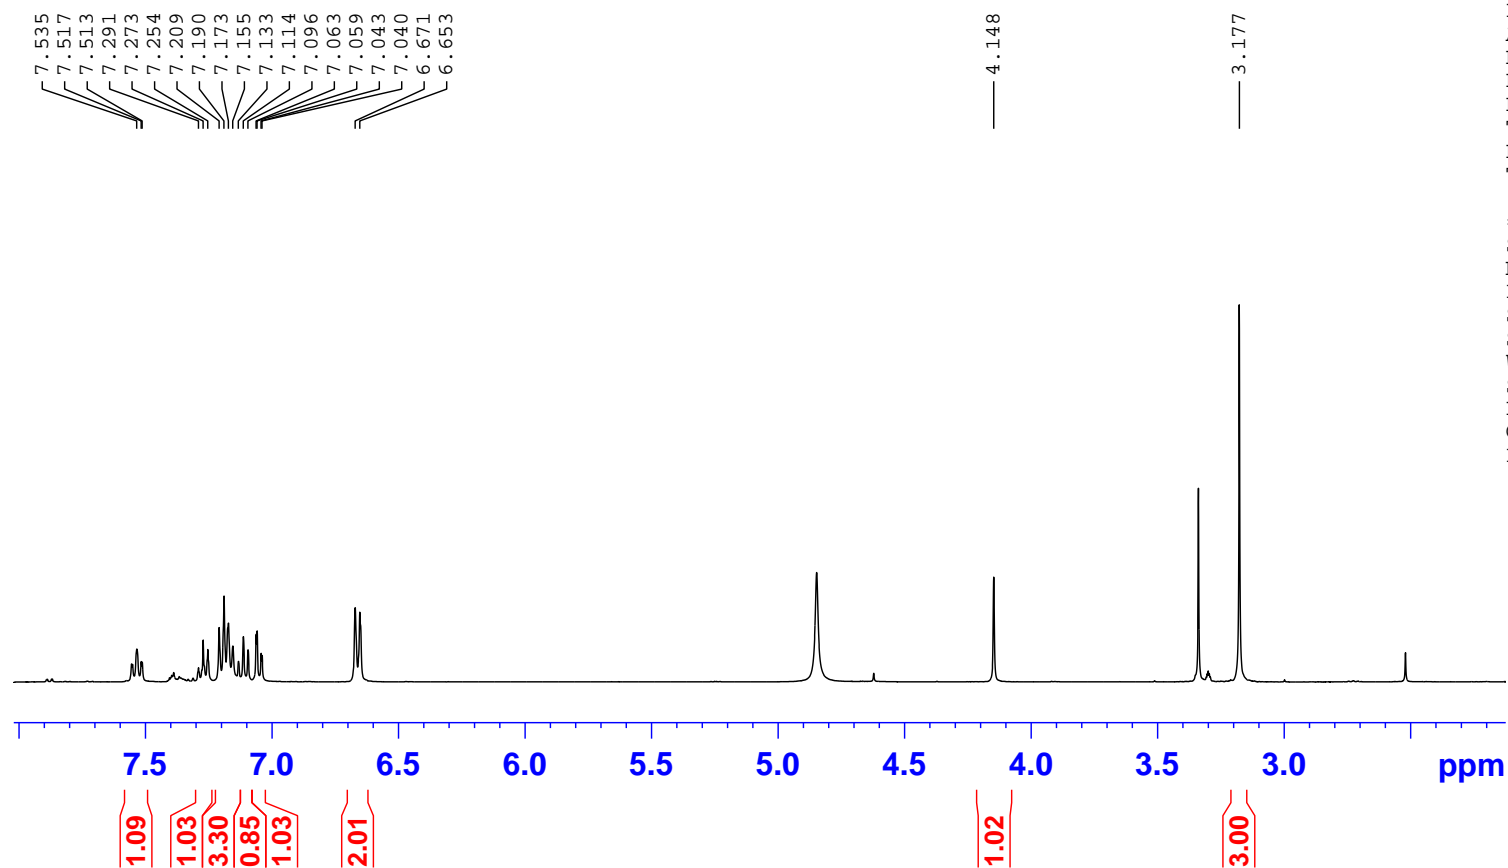

NAME HB-C16 M 60mg  
EXPNO 1  
PROCNO 1  
Date\_ 20200910  
Time 20.35  
INSTRUM spect  
PROBHD 5 mm PABBO BB-  
PULPROG zg30  
TD 65536  
SOLVENT MeOD  
NS 9  
DS 2  
SWH 8012.820 Hz  
FIDRES 0.122266 Hz  
AQ 4.0894966 sec  
RG 64  
DW 62.400 usec  
DE 6.50 usec  
TE 296.4 K  
D1 1.00000000 sec  
TD0 1

===== CHANNEL f1 =====  
SFO1 400.1324710 MHz  
NUC1 1H  
P1 13.90 usec  
SI 32768  
SF 400.1300116 MHz  
WDW EM  
SSB 0  
LB 0.30 Hz  
GB 0  
PC 1.00

Figure S46. <sup>1</sup>H NMR spectrum of **16**.



HB-C16 M 60mg C

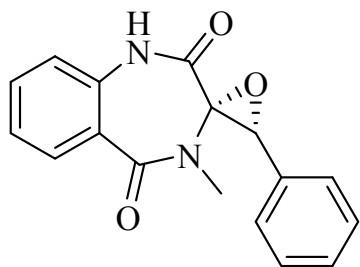

NAME HB-C16 M 60mg  
EXPNO 2  
PROCNO 1  
Date\_ 20200910  
Time 20.38  
INSTRUM spect  
PROBHD 5 mm PABBO BB-  
PULPROG zgpg30  
TD 65536  
SOLVENT MeOD  
NS 36  
DS 4  
SWH 24038.461 Hz  
FIDRES 0.366798 Hz  
AQ 1.3631988 sec  
RG 203  
DW 20.800 usec  
DE 6.50 usec  
TE 296.8 K  
D1 2.00000000 sec  
D11 0.03000000 sec  
TD0 1

===== CHANNEL f1 =====  
SFO1 100.6228293 MHz  
NUC1 13C  
P1 12.37 usec  
SI 32768  
SF 100.6126394 MHz  
WDW EM  
SSB 0  
LB 1.00 Hz  
GB 0  
PC 1.40

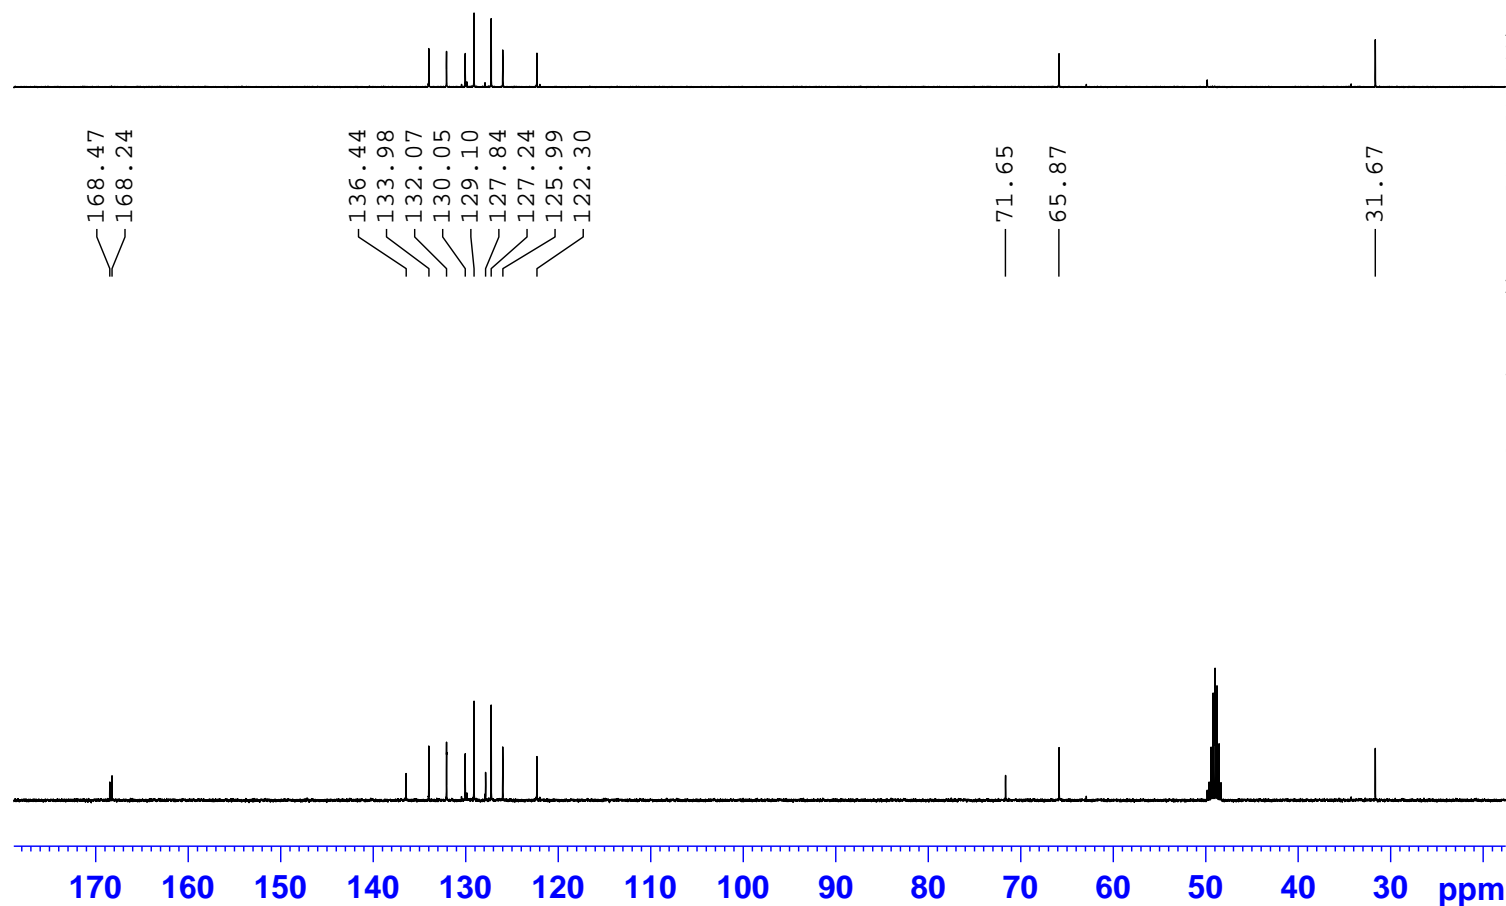

Figure S47. <sup>13</sup>C NMR spectrum of **16**.

HB-C11 M 8mg H

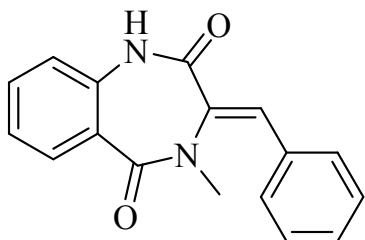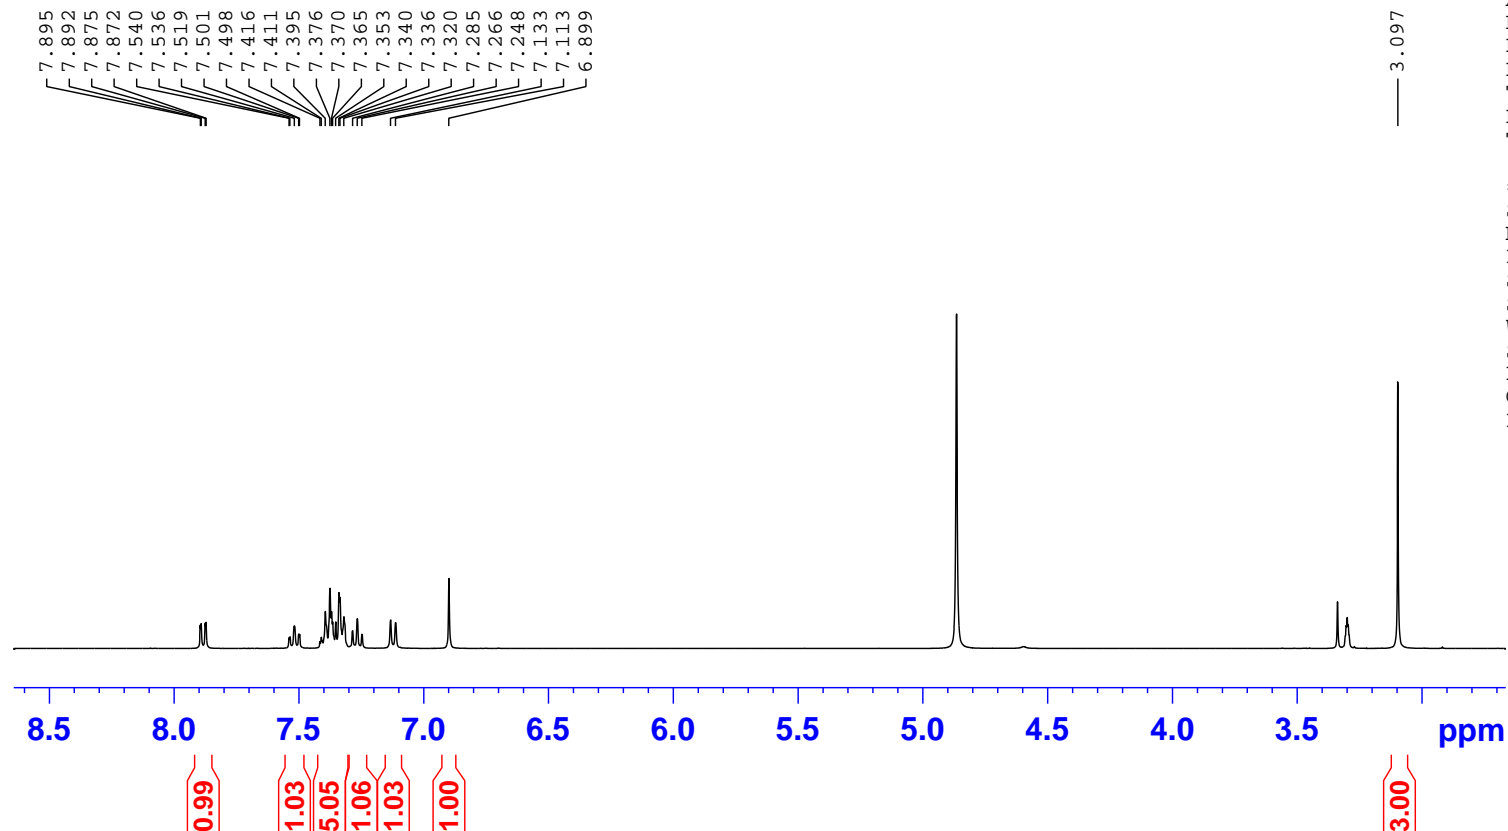

NAME HB-C11 M 8mg  
EXPNO 1  
PROCNO 1  
Date\_ 20200903  
Time 19.01  
INSTRUM spect  
PROBHD 5 mm PABBO BB-  
PULPROG zg30  
TD 65536  
SOLVENT MeOD  
NS 18  
DS 2  
SWH 8012.820 Hz  
FIDRES 0.122266 Hz  
AQ 4.0894966 sec  
RG 181  
DW 62.400 usec  
DE 6.50 usec  
TE 296.6 K  
D1 1.00000000 sec  
TD0 1

===== CHANNEL f1 =====  
SFO1 400.1324710 MHz  
NUC1 1H  
P1 13.90 usec  
SI 32768  
SF 400.1300116 MHz  
WDW EM  
SSB 0  
LB 0.30 Hz  
GB 0  
PC 1.00

Figure S48. <sup>1</sup>H NMR spectrum of **17**.

HB-C11 M 8mg C

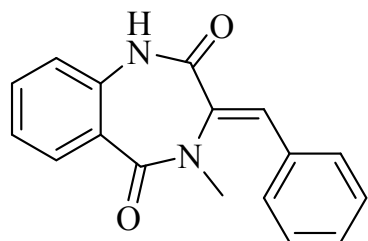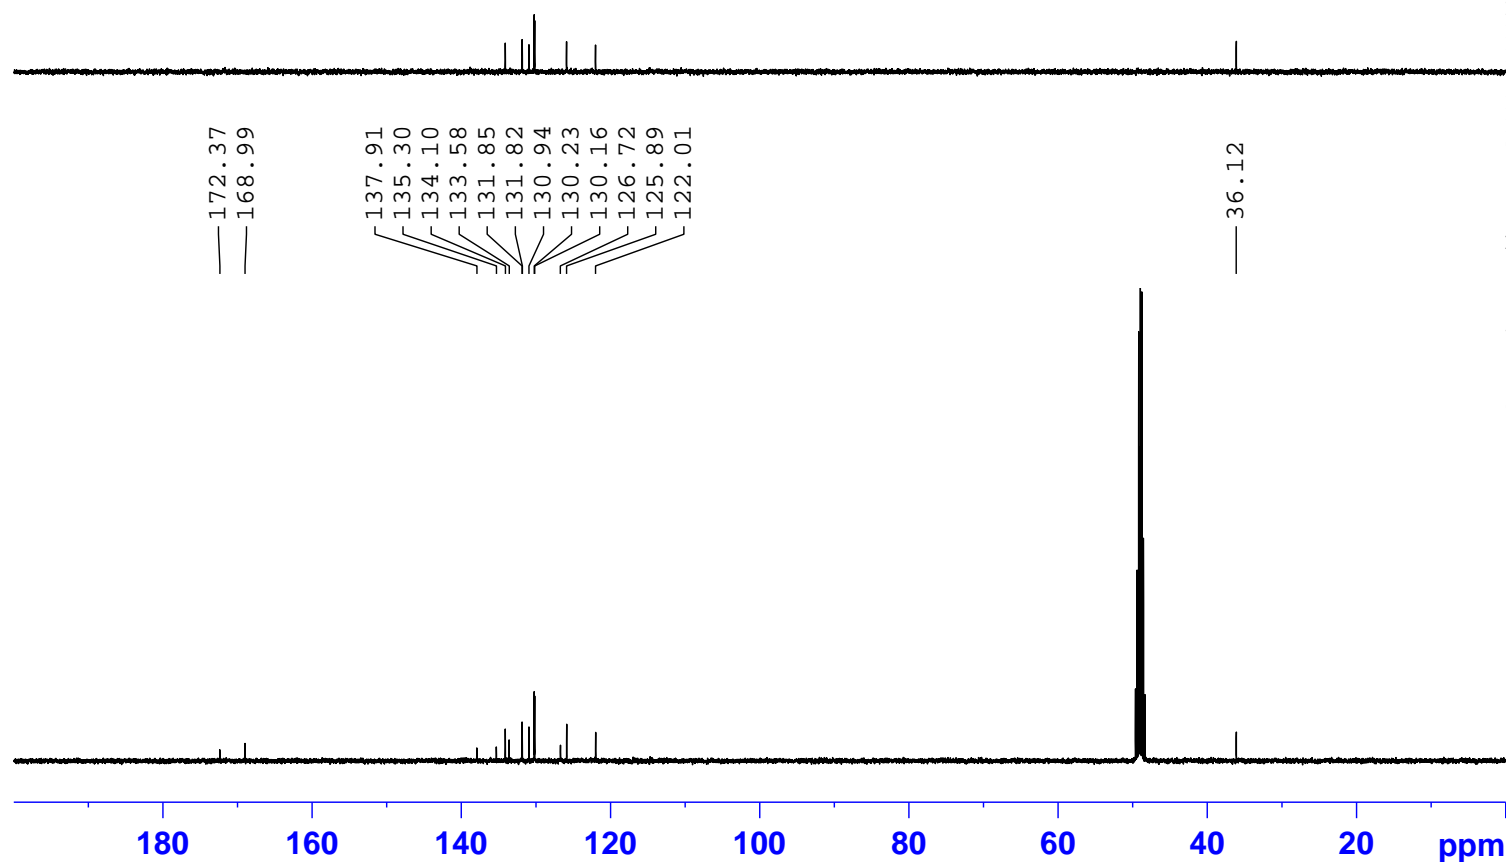

NAME HB-C11 M 8mg  
EXPNO 2  
PROCNO 1  
Date\_ 20200903  
Time 19.04  
INSTRUM spect  
PROBHD 5 mm PABBO BB-  
PULPROG zgpg30  
TD 65536  
SOLVENT MeOD  
NS 68  
DS 4  
SWH 24038.461 Hz  
FIDRES 0.366798 Hz  
AQ 1.3631988 sec  
RG 203  
DW 20.800 usec  
DE 6.50 usec  
TE 296.7 K  
D1 2.00000000 sec  
D11 0.03000000 sec  
TD0 1

===== CHANNEL f1 =====  
SFO1 100.6228293 MHz  
NUC1 13C  
P1 12.37 usec  
SI 32768  
SF 100.6126292 MHz  
WDW EM  
SSB 0  
LB 1.00 Hz  
GB 0  
PC 1.40

Figure S49.  $^{13}\text{C}$  NMR spectrum of **17**.

HB2-11 D 3mg H

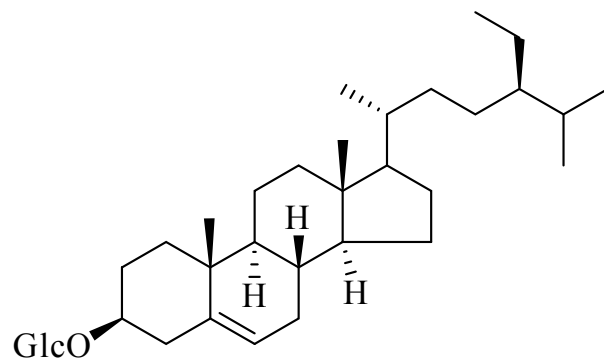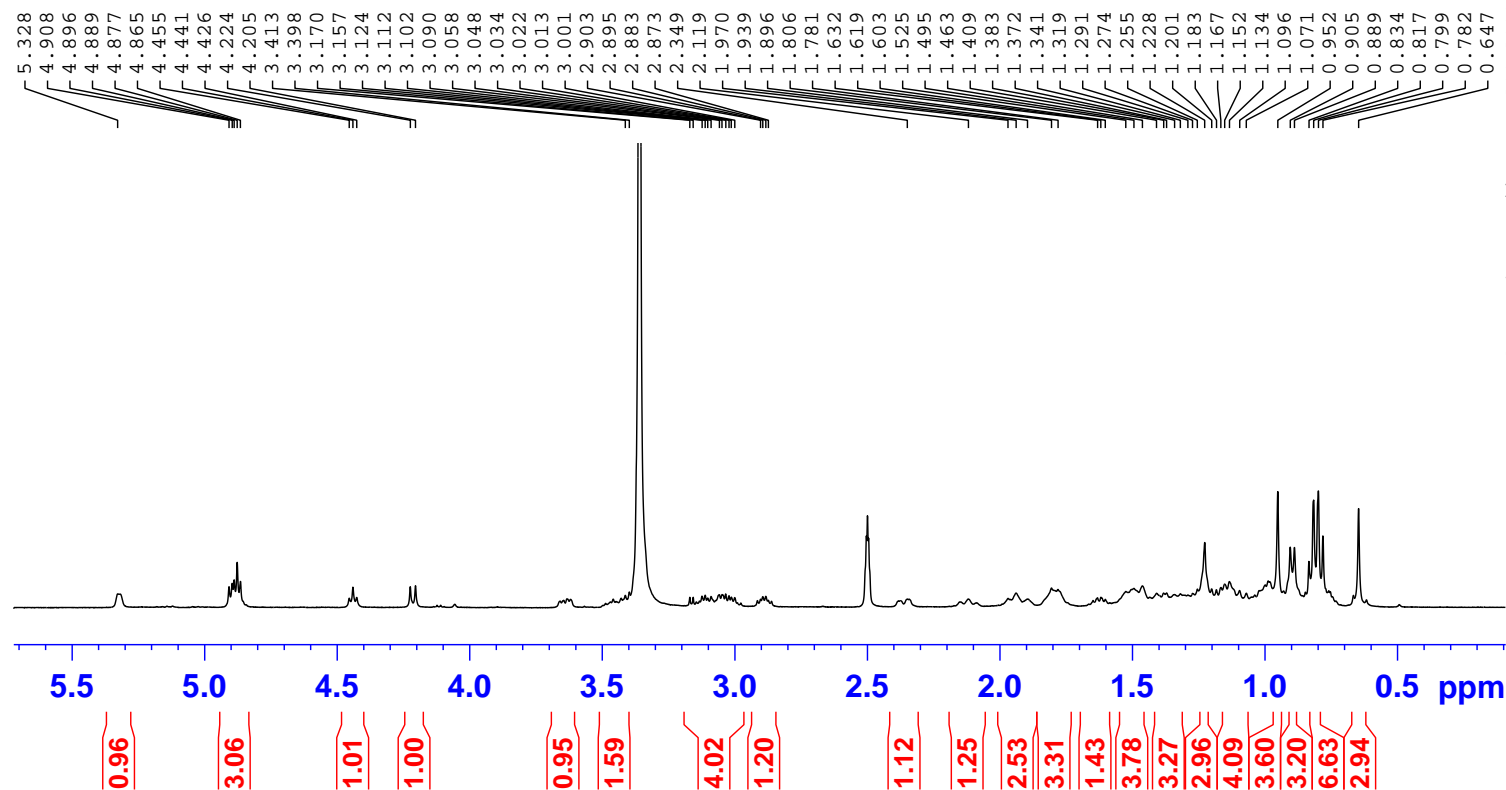

```

NAME      HB2-11 D 3mg
EXPNO      1
PROCNO      1
Date_      20200805
Time       10.32
INSTRUM     spect
PROBHD      5 mm PABBO BB-
PULPROG     zg30
TD          65536
SOLVENT      DMSO
NS           18
DS           2
SWH          8012.820 Hz
FIDRES       0.122266 Hz
AQ           4.0894966 sec
RG           181
DW           62.400 usec
DE           6.50 usec
TE           295.9 K
D1           1.00000000 sec
TD0          1

===== CHANNEL f1 =====
SFO1        400.1324710 MHz
NUC1         1H
P1           13.90 usec
SI           32768
SF           400.1300032 MHz
WDW          EM
SSB          0
LB           0.30 Hz
GB           0
PC           1.00
  
```

Figure S50. <sup>1</sup>H NMR spectrum of **18**.

HB2-11 D 3mg C



NAME HB2-11 D 3mg  
EXPNO 2  
PROCNO 1  
Date\_ 20200805  
Time 10.34  
INSTRUM spect  
PROBHD 5 mm PABBO BB-  
PULPROG zgpg30  
TD 65536  
SOLVENT DMSO  
NS 3984  
DS 4  
SWH 24038.461 Hz  
FIDRES 0.366798 Hz  
AQ 1.3631988 sec  
RG 203  
DW 20.800 usec  
DE 6.50 usec  
TE 296.1 K  
D1 2.00000000 sec  
D11 0.03000000 sec  
TD0 1

===== CHANNEL f1 =====  
SFO1 100.6228293 MHz  
NUC1 13C  
P1 12.37 usec  
SI 32768  
SF 100.6128135 MHz  
WDW EM  
SSB 0  
LB 1.00 Hz  
GB 0  
PC 1.40

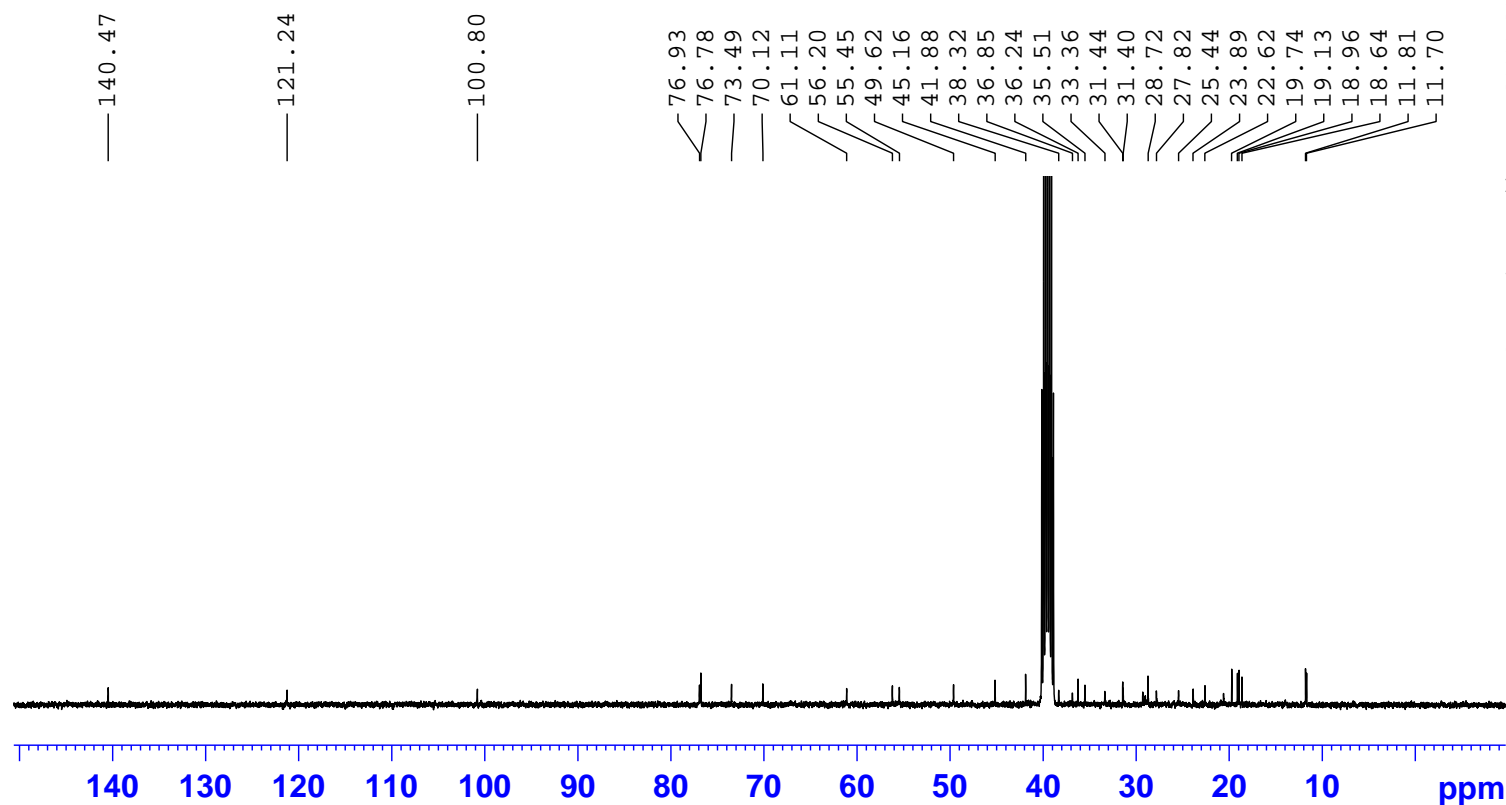

Figure S51. <sup>13</sup>C NMR spectrum of 18.

HB2-1 M 7mg H

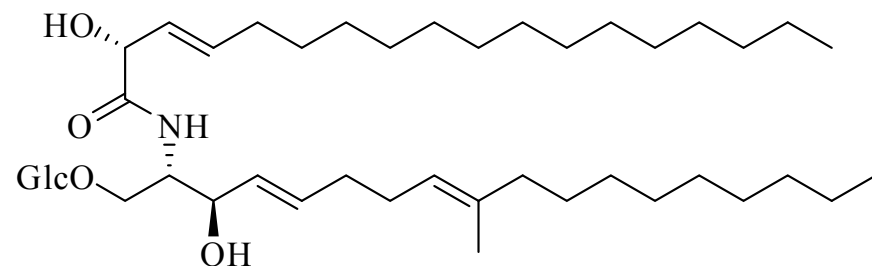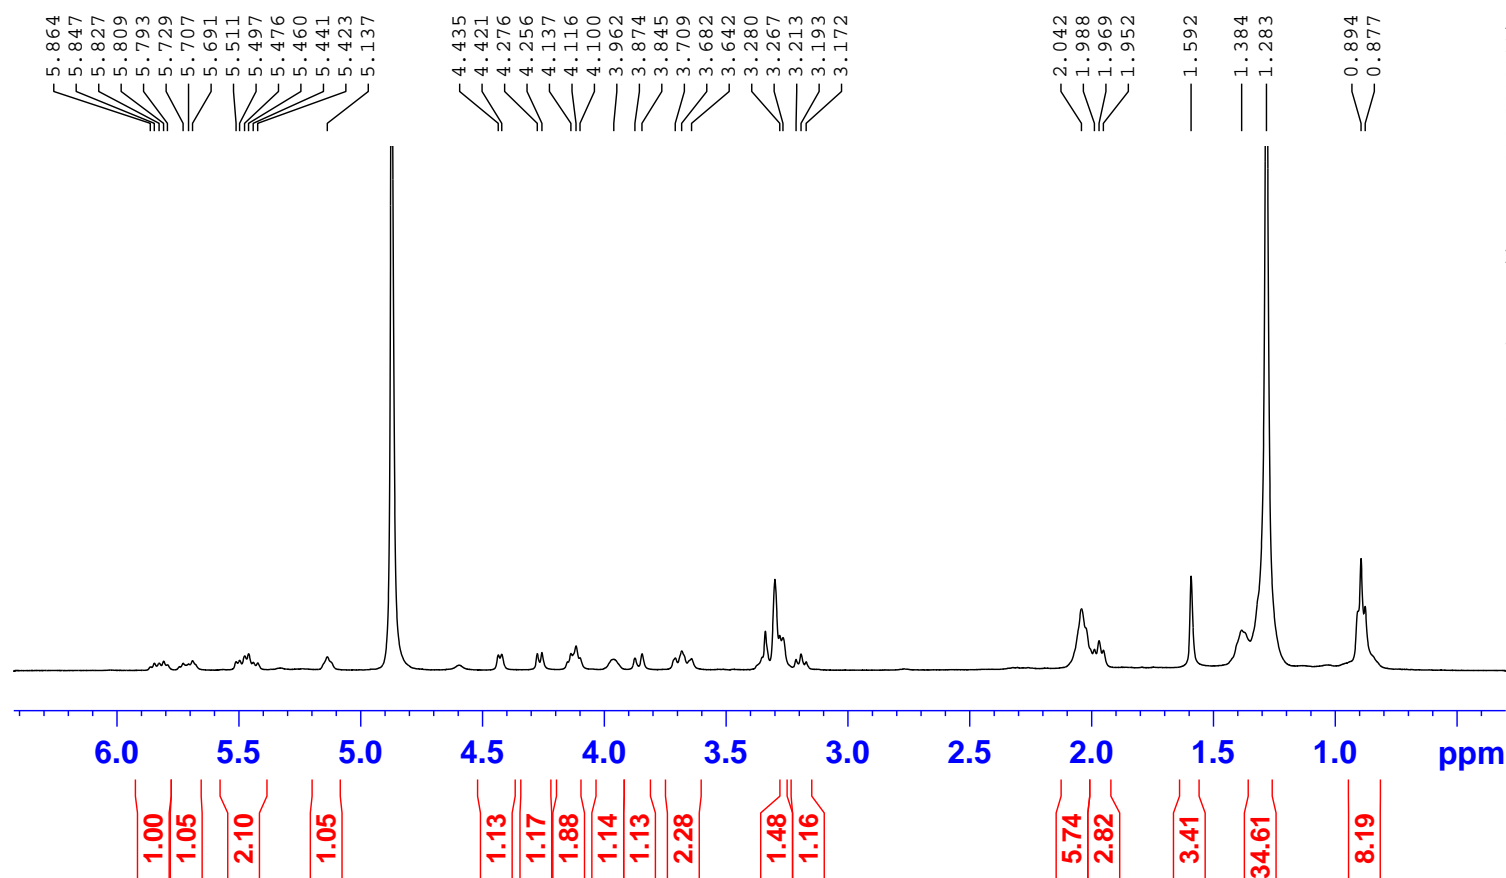

NAME HB2-1 M 7mg  
 EXPNO 1  
 PROCNO 1  
 Date\_ 20200723  
 Time 19.44  
 INSTRUM spect  
 PROBHD 5 mm PABBO BB-  
 PULPROG zg30  
 TD 65536  
 SOLVENT MeOD  
 NS 19  
 DS 2  
 SWH 8012.820 Hz  
 FIDRES 0.122266 Hz  
 AQ 4.0894966 sec  
 RG 144  
 DW 62.400 usec  
 DE 6.50 usec  
 TE 295.9 K  
 D1 1.00000000 sec  
 TD0 1

===== CHANNEL f1 =====  
 SFO1 400.1324710 MHz  
 NUC1 1H  
 P1 13.90 usec  
 SI 32768  
 SF 400.1300115 MHz  
 WDW EM  
 SSB 0  
 LB 0.30 Hz  
 GB 0  
 PC 1.00

Figure S52. <sup>1</sup>H NMR spectrum of **19**.

HB2-1 M 7mg C

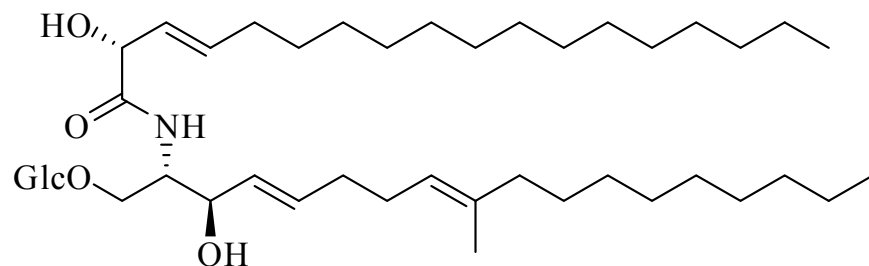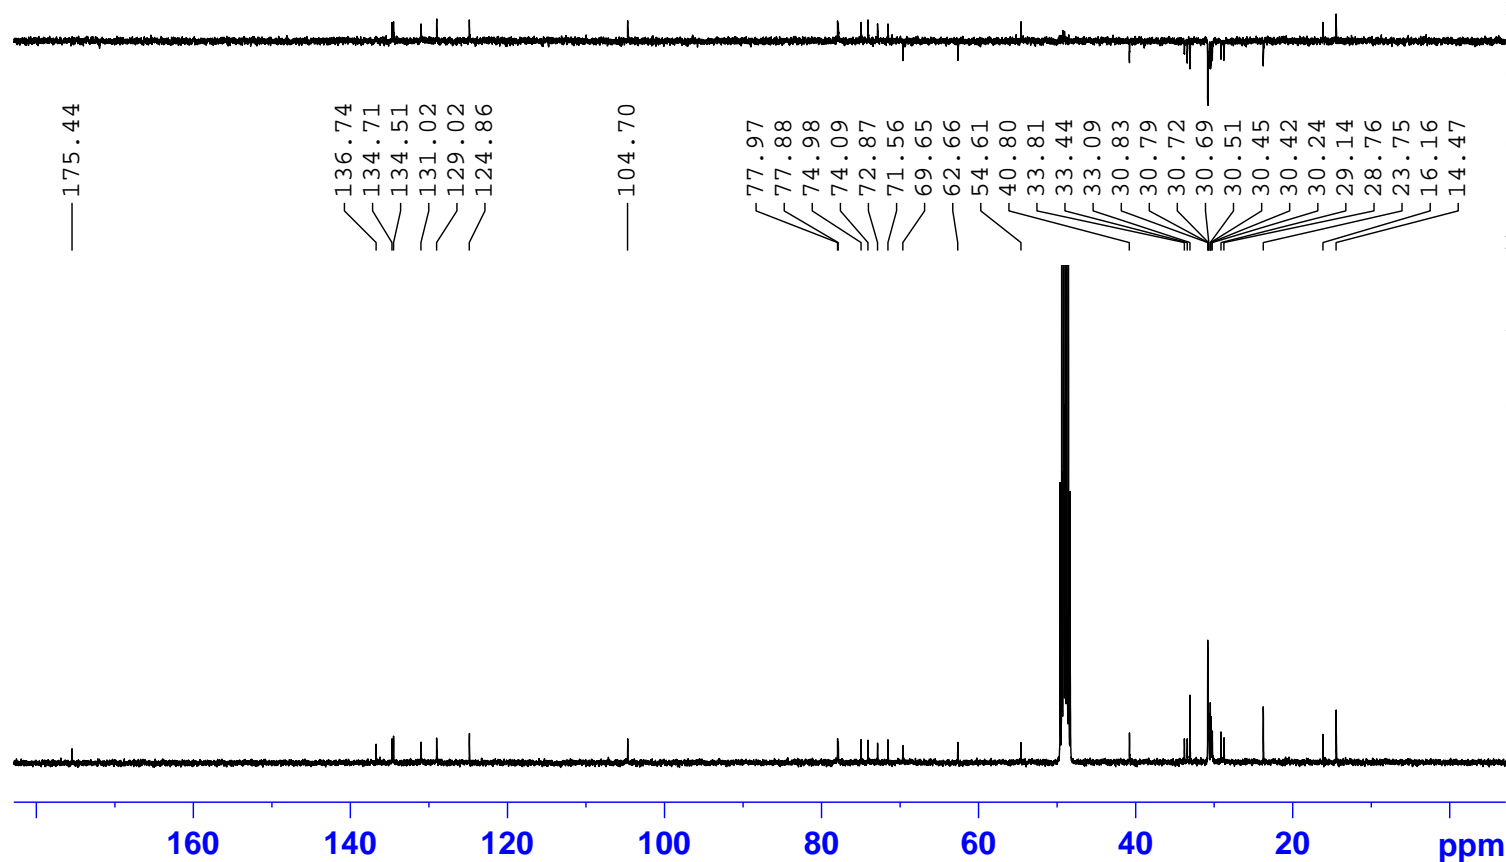

NAME HB2-1 M 7mg  
EXPNO 2  
PROCNO 1  
Date\_ 20200723  
Time 19.47  
INSTRUM spect  
PROBHD 5 mm PABBO BB-  
PULPROG zgpg30  
TD 65536  
SOLVENT MeOD  
NS 1494  
DS 4  
SWH 24038.461 Hz  
FIDRES 0.366798 Hz  
AQ 1.3631988 sec  
RG 203  
DW 20.800 usec  
DE 6.50 usec  
TE 296.2 K  
D1 2.00000000 sec  
D11 0.03000000 sec  
TD0 1

===== CHANNEL f1 =====  
SFO1 100.6228293 MHz  
NUC1 13C  
P1 12.37 usec  
SI 32768  
SF 100.6126284 MHz  
WDW EM  
SSB 0  
LB 1.00 Hz  
GB 0  
PC 1.40

Figure S53.  $^{13}\text{C}$  NMR spectrum of 19.

HB-C17 M 8mg H

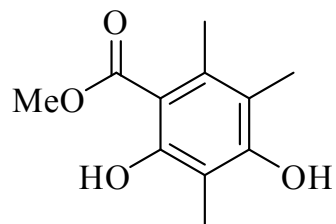

NAME HB-C17 M 8mg  
EXPNO 1  
PROCNO 1  
Date\_ 20201203  
Time 20.33  
INSTRUM spect  
PROBHD 5 mm PABBO BB-  
PULPROG zg30  
TD 65536  
SOLVENT MeOD  
NS 15  
DS 2  
SWH 8012.820 Hz  
FIDRES 0.122266 Hz  
AQ 4.0894966 sec  
RG 161  
DW 62.400 usec  
DE 6.50 usec  
TE 295.8 K  
D1 1.00000000 sec  
TD0 1

===== CHANNEL f1 =====  
SFO1 400.1324710 MHz  
NUC1 1H  
P1 13.90 usec  
SI 32768  
SF 400.1300116 MHz  
WDW EM  
SSB 0  
LB 0.30 Hz  
GB 0  
PC 1.00

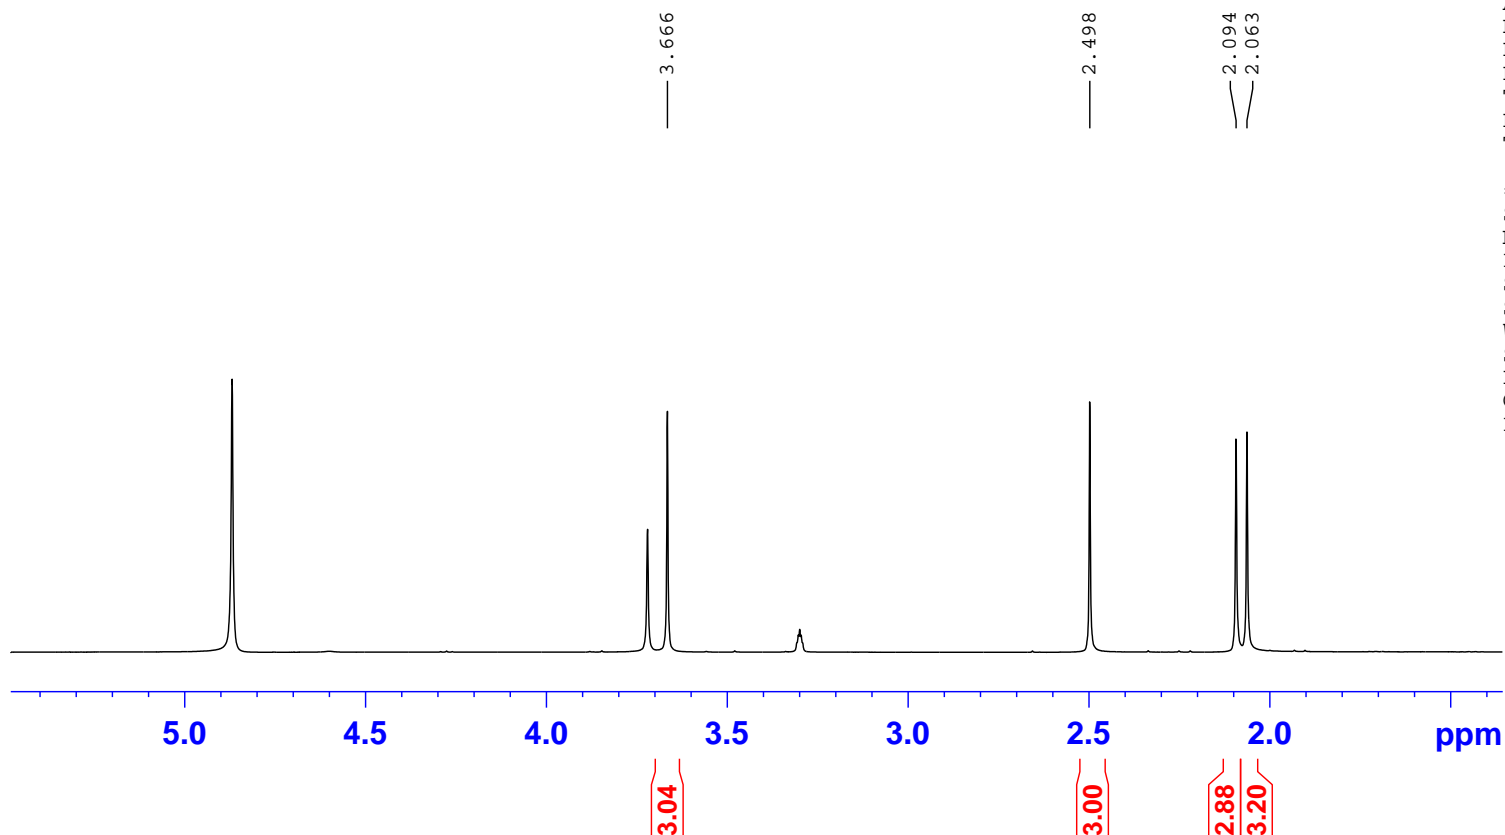

Figure S54. <sup>1</sup>H NMR spectrum of **20**.



HB-C17 M 8mg C

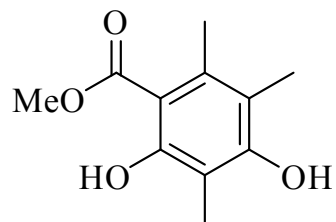

NAME HB-C17 M 8mg  
EXPNO 2  
PROCNO 1  
Date\_ 20201203  
Time 20.42  
INSTRUM spect  
PROBHD 5 mm PABBO BB-  
PULPROG zgpg30  
TD 65536  
SOLVENT MeOD  
NS 137  
DS 4  
SWH 24038.461 Hz  
FIDRES 0.366798 Hz  
AQ 1.3631988 sec  
RG 203  
DW 20.800 usec  
DE 6.50 usec  
TE 296.8 K  
D1 2.00000000 sec  
D11 0.03000000 sec  
TD0 1

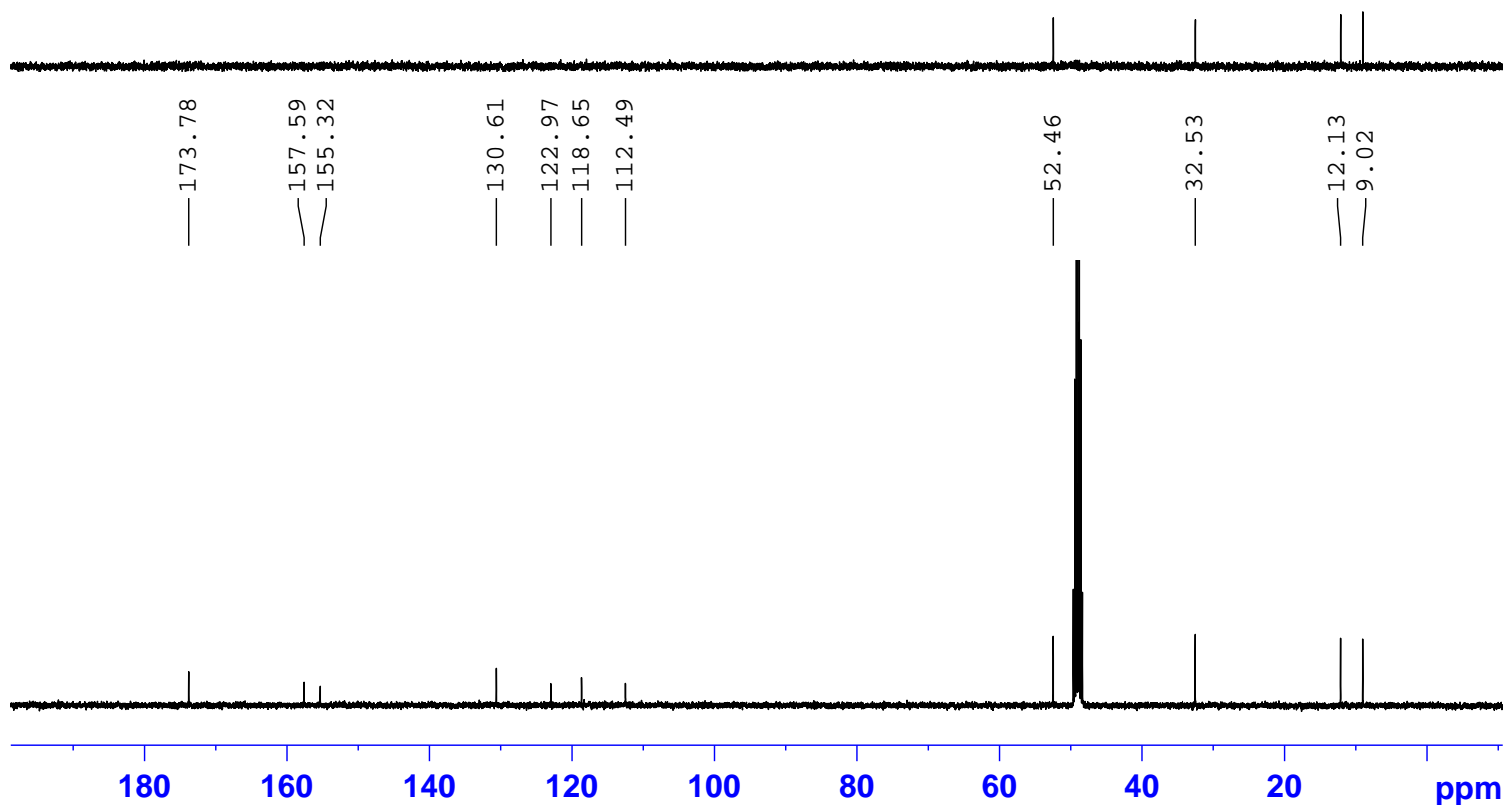

===== CHANNEL f1 =====  
SF01 100.6228293 MHz  
NUC1 13C  
P1 12.37 usec  
SI 32768  
SF 100.6126292 MHz  
WDW EM  
SSB 0  
LB 1.00 Hz  
GB 0  
PC 1.40

Figure S55. <sup>13</sup>C NMR spectrum of 20.

HB-C18 C 1mg H

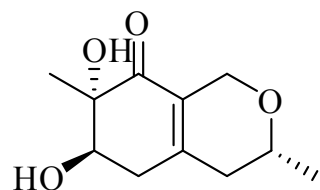

```

NAME      HB-C18 C 2mg
EXPNO     1
PROCNO    1
Date_     20191204
Time      22.34
INSTRUM   spect
PROBHD    5 mm PABBO BB-
PULPROG   zg30
TD        65536
SOLVENT   CDCl3
NS        512
DS        2
SWH       8012.820 Hz
FIDRES    0.122266 Hz
AQ        4.0894966 sec
RG        203
DW        62.400 usec
DE        6.50 usec
TE        295.5 K
D1        1.00000000 sec
TD0       1
  
```

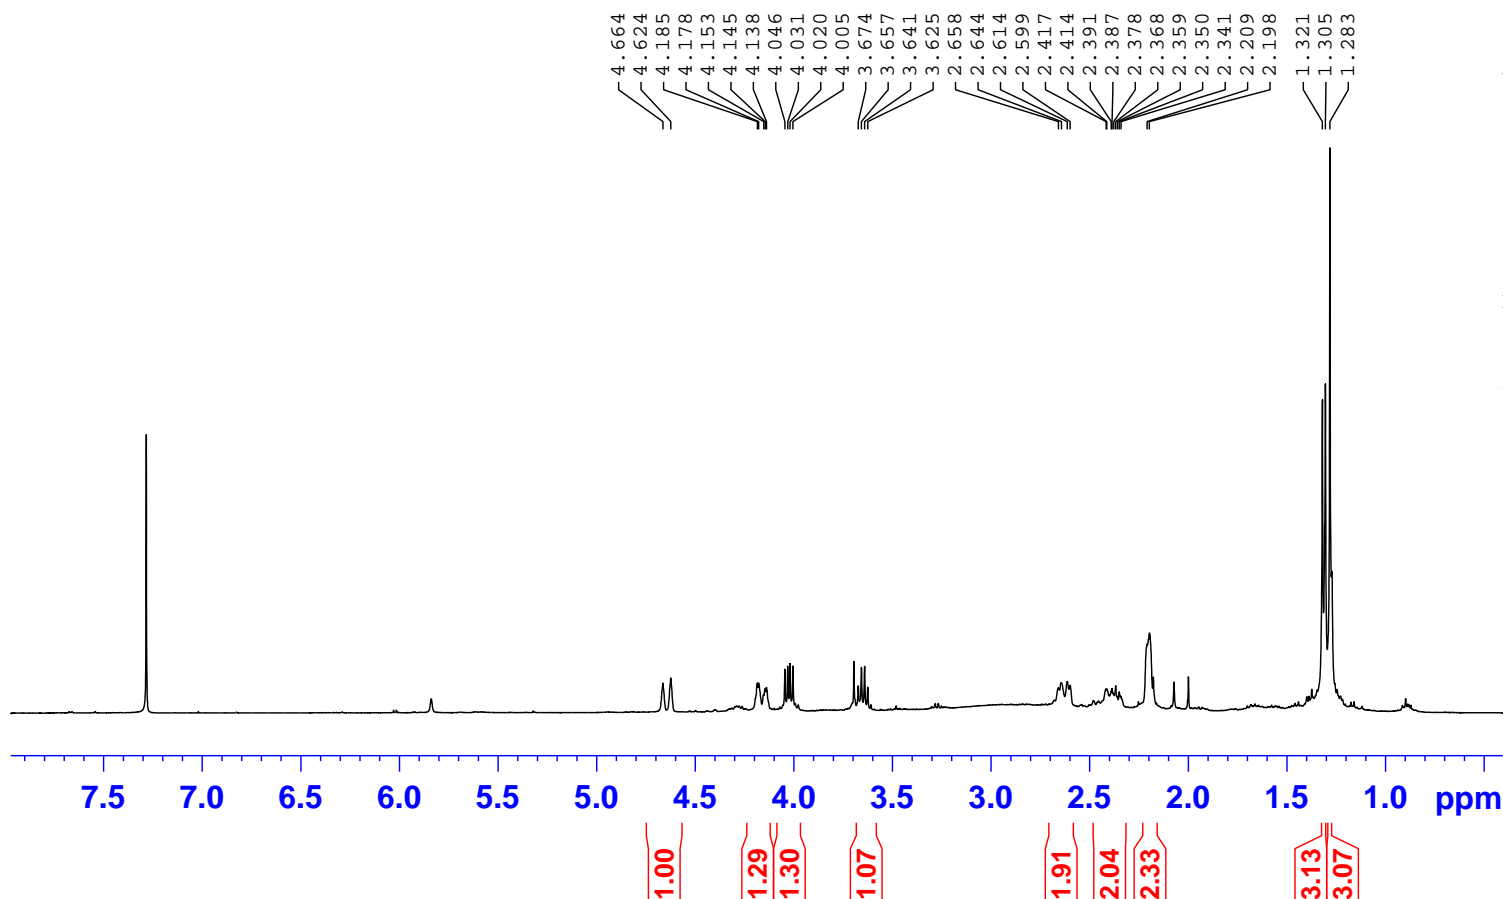

Figure S56. <sup>1</sup>H NMR spectrum of **21**.

HB-C18 C 1mg C

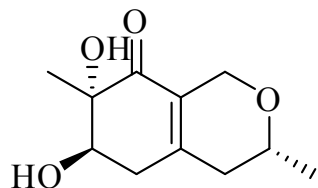

NAME HB-C18 C 2mg  
EXPNO 2  
PROCNO 1  
Date\_ 20191205  
Time 8.20  
INSTRUM spect  
PROBHD 5 mm PABBO BB-  
PULPROG zgpg30  
TD 65536  
SOLVENT CDCl3  
NS 10240  
DS 4  
SWH 24038.461 Hz  
FIDRES 0.366798 Hz  
AQ 1.3631988 sec  
RG 203  
DW 20.800 usec  
DE 6.50 usec  
TE 296.6 K  
D1 2.00000000 sec  
D11 0.03000000 sec  
TD0 1

===== CHANNEL f1 =====  
SFO1 100.6228293 MHz  
NUC1 13C  
P1 12.37 usec  
SI 32768  
SF 100.6127712 MHz  
WDW EM  
SSB 0  
LB 1.00 Hz  
GB 0  
PC 1.40

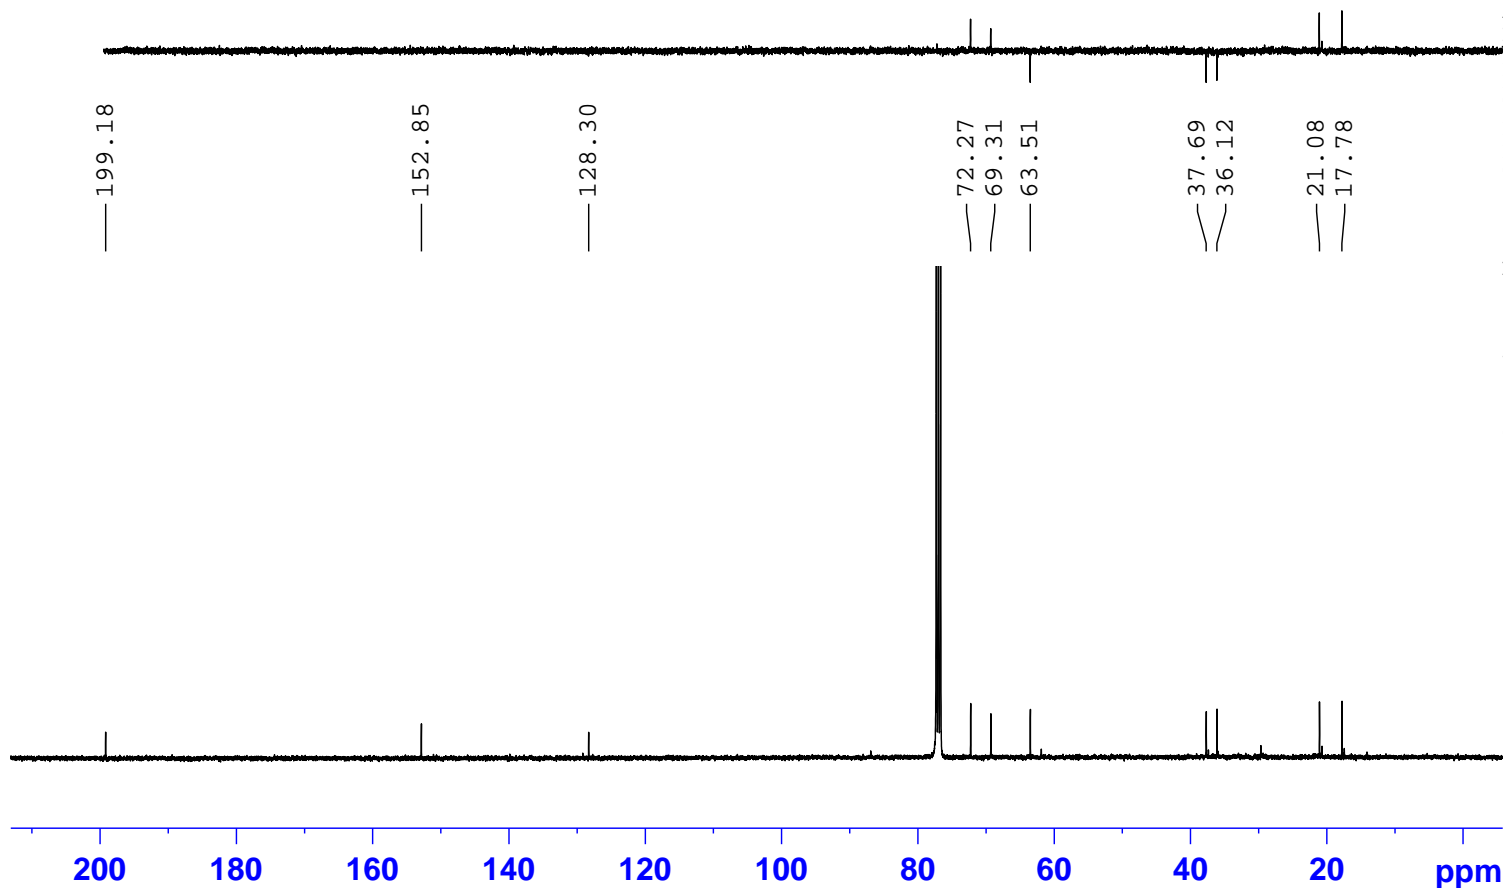

Figure S57. <sup>13</sup>C NMR spectrum of 21.

HB-C19 C 1mg H

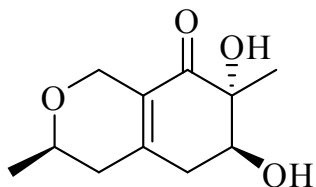

NAME HB-C19 C 1.5mg  
EXPNO 1  
PROCNO 1  
Date\_ 20200920  
Time 14.47  
INSTRUM spect  
PROBHD 5 mm PABBO BB-  
PULPROG zg30  
TD 65536  
SOLVENT CDCl3  
NS 27  
DS 2  
SWH 8012.820 Hz  
FIDRES 0.122266 Hz  
AQ 4.0894966 sec  
RG 203  
DW 62.400 usec  
DE 6.50 usec  
TE 296.0 K  
D1 1.00000000 sec  
TD0 1

===== CHANNEL f1 =====  
SFO1 400.1324710 MHz  
NUC1 1H  
P1 13.90 usec  
SI 32768  
SF 400.1300000 MHz  
WDW EM  
SSB 0  
LB 0.30 Hz  
GB 0  
PC 1.00

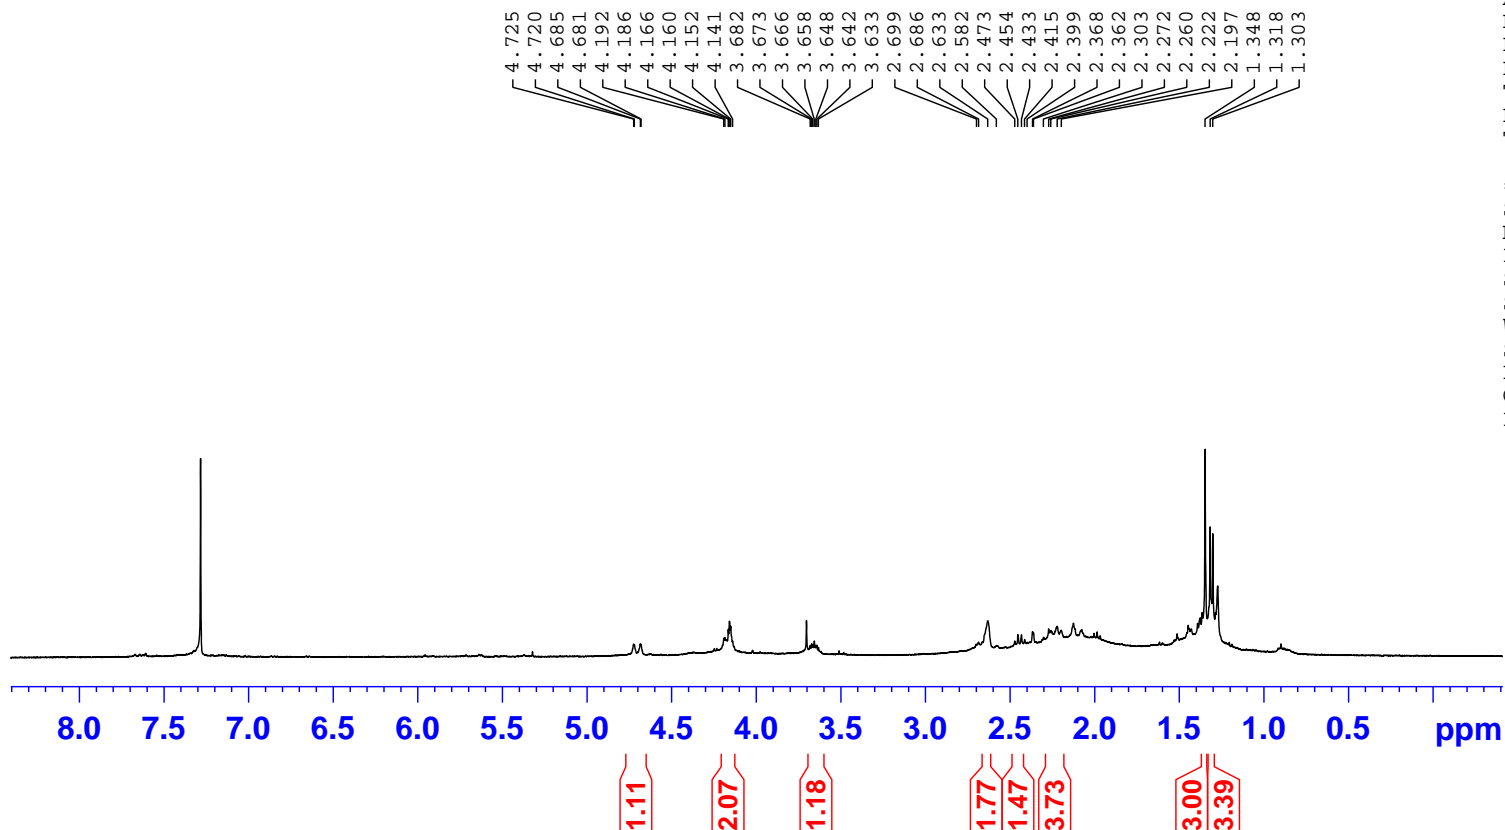

Figure S58. <sup>1</sup>H NMR spectrum of 22.

HB-C19 C 1mg C

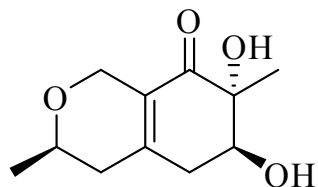

NAME HB-C19 C 1.5mg  
EXPNO 2  
PROCNO 1  
Date\_ 20200921  
Time 6.33  
INSTRUM spect  
PROBHD 5 mm PABBO BB-  
PULPROG zgpg30  
TD 65536  
SOLVENT CDCl3  
NS 15360  
DS 4  
SWH 24038.461 Hz  
FIDRES 0.366798 Hz  
AQ 1.3631988 sec  
RG 203  
DW 20.800 usec  
DE 6.50 usec  
TE 297.1 K  
D1 2.00000000 sec  
D11 0.03000000 sec  
TD0 1

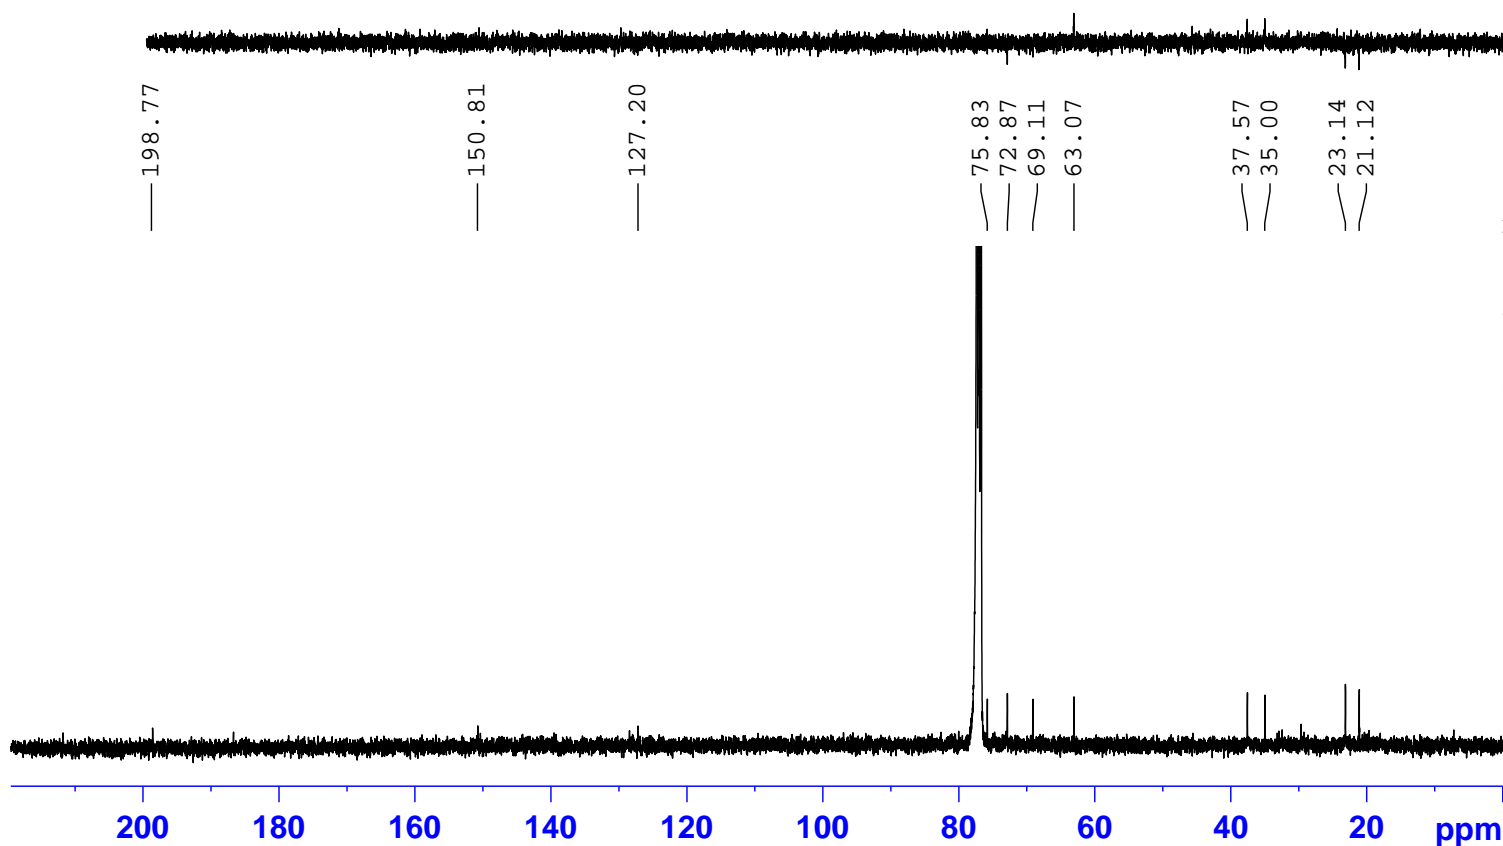

===== CHANNEL f1 =====  
SFO1 100.6228293 MHz  
NUC1 13C  
P1 12.37 usec  
SI 32768  
SF 100.6127685 MHz  
WDW EM  
SSB 0  
LB 1.00 Hz  
GB 0  
PC 1.40

Figure S59. <sup>13</sup>C NMR spectrum of 22.

HB-C15 M 2mg H

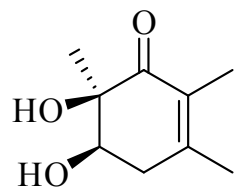

NAME HB-C15 M 2mg  
EXPNO 1  
PROCNO 1  
Date\_ 20200910  
Time 21.08  
INSTRUM spect  
PROBHD 5 mm PABBO BB-  
PULPROG zg30  
TD 65536  
SOLVENT MeOD  
NS 21  
DS 2  
SWH 8012.820 Hz  
FIDRES 0.122266 Hz  
AQ 4.0894966 sec  
RG 203  
DW 62.400 usec  
DE 6.50 usec  
TE 296.5 K  
D1 1.00000000 sec  
TD0 1

===== CHANNEL f1 =====  
SFO1 400.1324710 MHz  
NUC1 1H  
P1 13.90 usec  
SI 32768  
SF 400.1300117 MHz  
WDW EM  
SSB 0  
LB 0.30 Hz  
GB 0  
PC 1.00

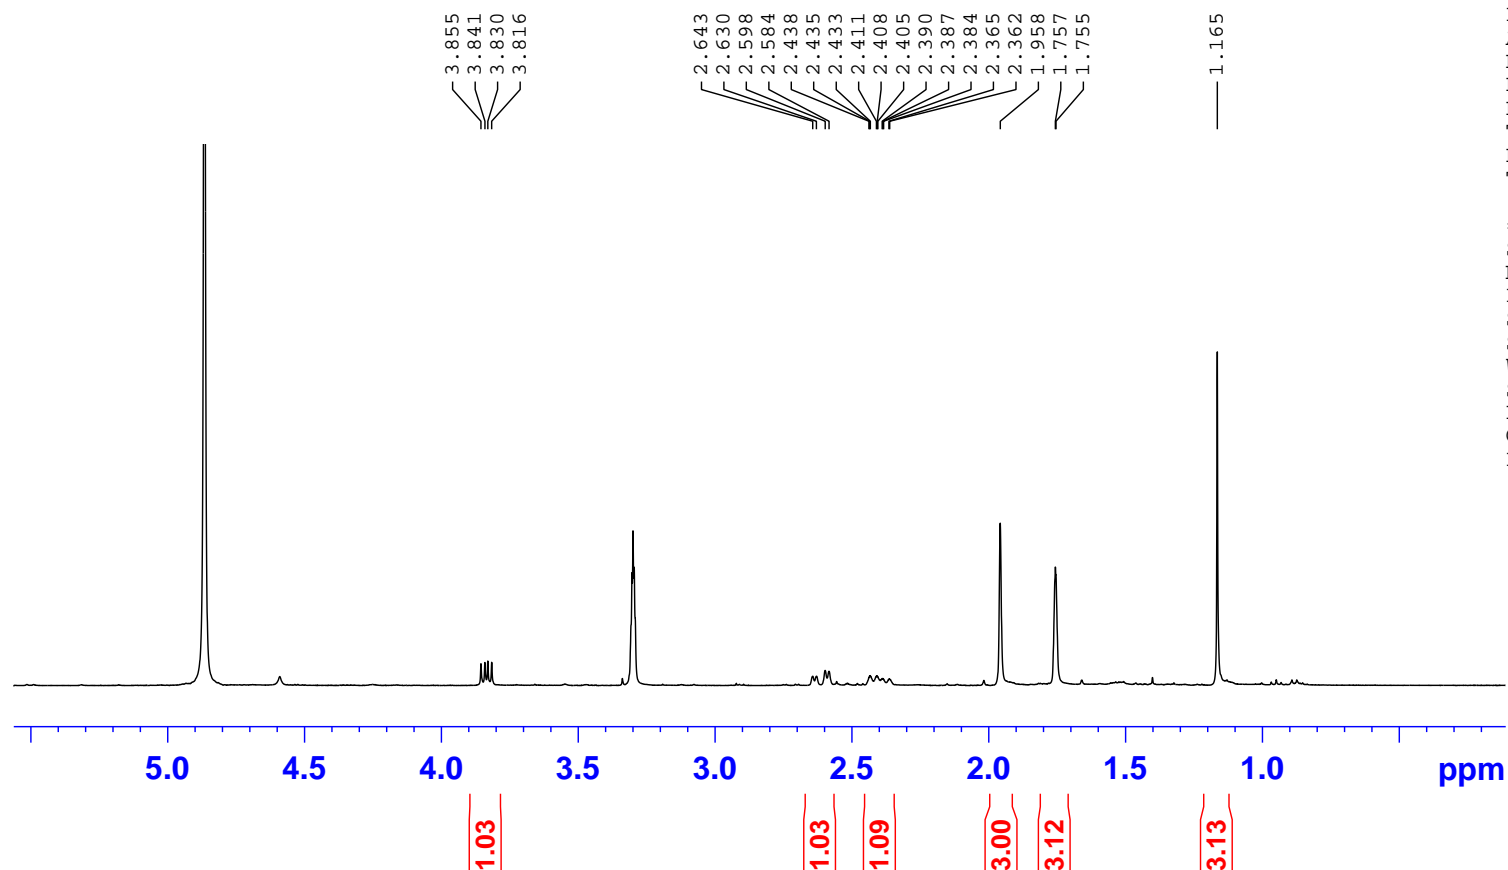

Figure S60. <sup>1</sup>H NMR spectrum of **23**.

HB-C15 M 2mg C



NAME HB-C15 M 2mg  
EXPNO 2  
PROCNO 1  
Date\_ 20200911  
Time 6.56  
INSTRUM spect  
PROBHD 5 mm PABBO BB-  
PULPROG zgpg30  
TD 65536  
SOLVENT MeOD  
NS 10240  
DS 4  
SWH 24038.461 Hz  
FIDRES 0.366798 Hz  
AQ 1.3631988 sec  
RG 203  
DW 20.800 usec  
DE 6.50 usec  
TE 297.2 K  
D1 2.00000000 sec  
D11 0.03000000 sec  
TD0 1

===== CHANNEL f1 =====  
SFO1 100.6228293 MHz  
NUC1 13C  
P1 12.37 usec  
SI 32768  
SF 100.6126274 MHz  
WDW EM  
SSB 0  
LB 1.00 Hz  
GB 0  
PC 1.40

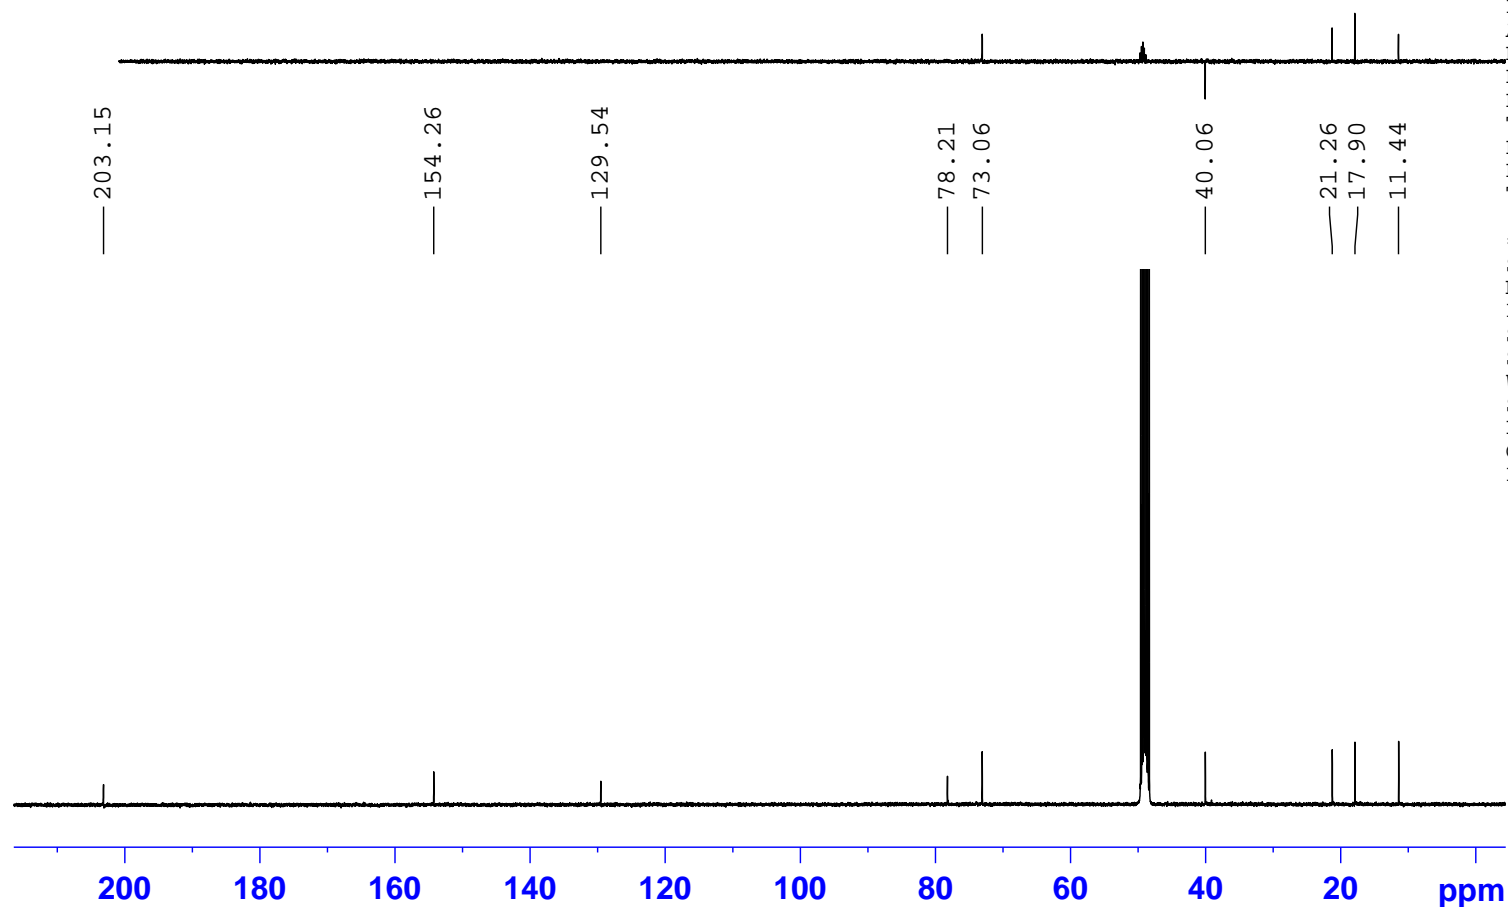

Figure S61. <sup>13</sup>C NMR spectrum of **23**.

HB4-9 C 5mg H

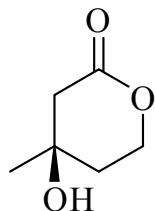

NAME HB4-9 C 5mg  
EXPNO 1  
PROCNO 1  
Date\_ 20200611  
Time 15.03  
INSTRUM spect  
PROBHD 5 mm PABBO BB-  
PULPROG zg30  
TD 65536  
SOLVENT CDCl3  
NS 27  
DS 2  
SWH 8012.820 Hz  
FIDRES 0.122266 Hz  
AQ 4.0894966 sec  
RG 203  
DW 62.400 usec  
DE 6.50 usec  
TE 296.8 K  
D1 1.00000000 sec  
TD0 1

===== CHANNEL f1 =====  
SFO1 400.1324710 MHz  
NUC1 1H  
P1 13.90 usec  
SI 32768  
SF 400.1300000 MHz  
WDW EM  
SSB 0  
LB 0.30 Hz  
GB 0  
PC 1.00

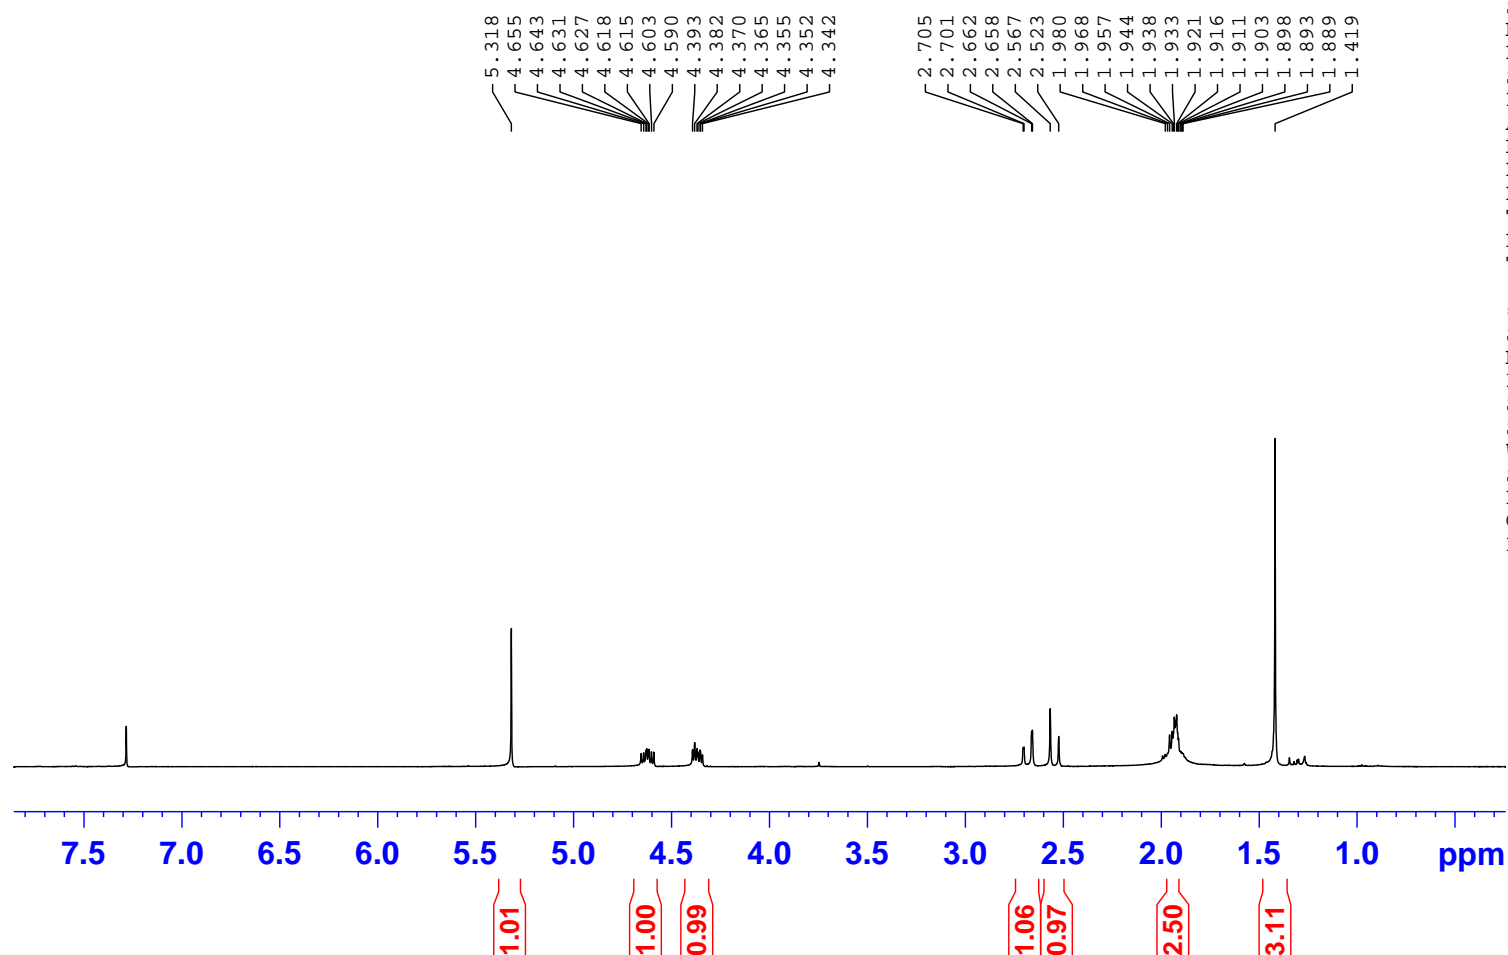

Figure S62. <sup>1</sup>H NMR spectrum of **24**.



HB4-9 C 5mg C

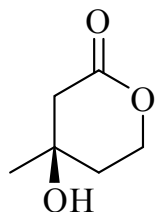

NAME HB4-9 C 5mg  
EXPNO 2  
PROCNO 1  
Date\_ 20200611  
Time 15.07  
INSTRUM spect  
PROBHD 5 mm PABBO BB-  
PULPROG zgpg30  
TD 65536  
SOLVENT CDCl3  
NS 1020  
DS 4  
SWH 24038.461 Hz  
FIDRES 0.366798 Hz  
AQ 1.3631988 sec  
RG 203  
DW 20.800 usec  
DE 6.50 usec  
TE 297.0 K  
D1 2.00000000 sec  
D11 0.03000000 sec  
TD0 1

===== CHANNEL f1 =====  
SFO1 100.6228293 MHz  
NUC1 13C  
P1 12.37 usec  
SI 32768  
SF 100.6127729 MHz  
WDW EM  
SSB 0  
LB 1.00 Hz  
GB 0  
PC 1.40

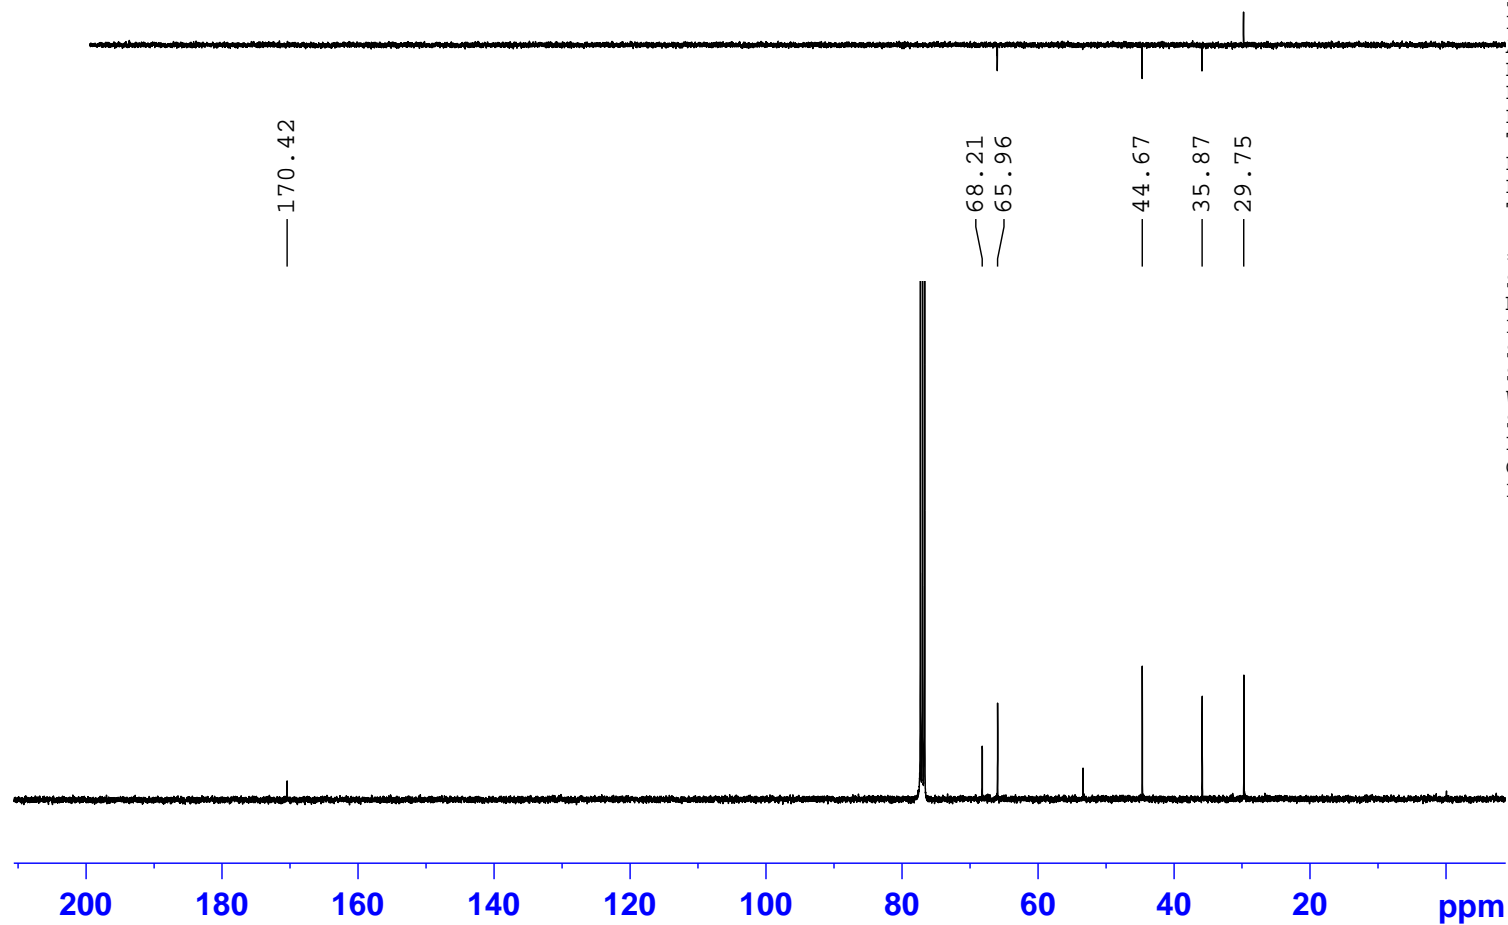

Figure S63.  $^{13}\text{C}$  NMR spectrum of 24.

HB-C12 M 26mg H



NAME HB-C12 M 26mg  
EXPNO 1  
PROCNO 1  
Date\_ 20200906  
Time 13.43  
INSTRUM spect  
PROBHD 5 mm PABBO BB-  
PULPROG zg30  
TD 65536  
SOLVENT MeOD  
NS 14  
DS 2  
SWH 8012.820 Hz  
FIDRES 0.122266 Hz  
AQ 4.0894966 sec  
RG 101  
DW 62.400 usec  
DE 6.50 usec  
TE 296.0 K  
D1 1.00000000 sec  
TD0 1

===== CHANNEL f1 =====  
SFO1 400.1324710 MHz  
NUC1 1H  
P1 13.90 usec  
SI 32768  
SF 400.1300117 MHz  
WDW EM  
SSB 0  
LB 0.30 Hz  
GB 0  
PC 1.00

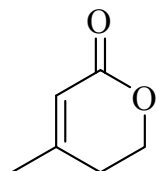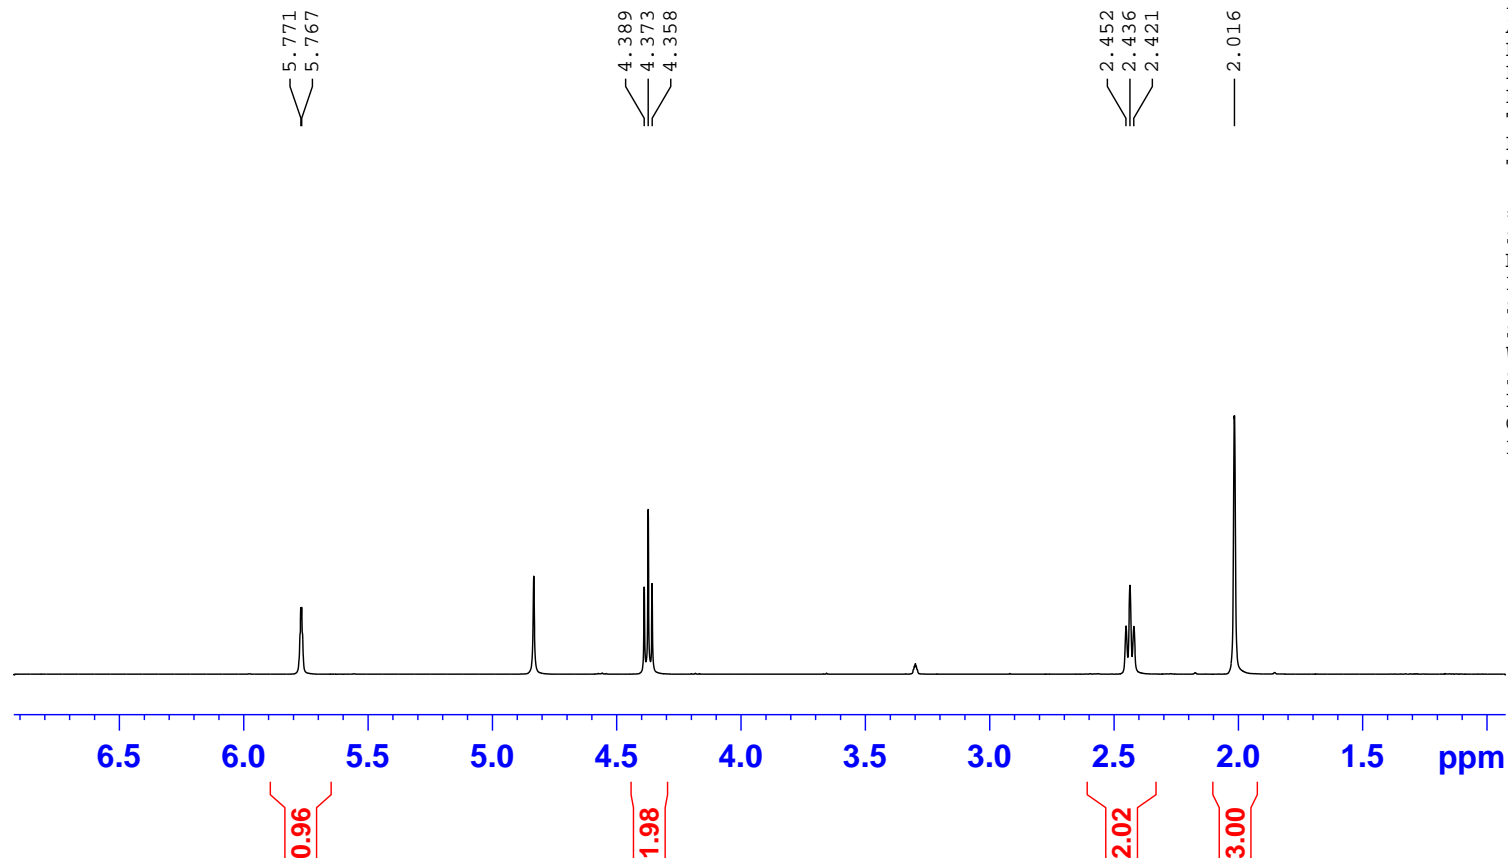

Figure S64. <sup>1</sup>H NMR spectrum of **25**.

HB-C12 M 26mg C



NAME HB-C12 M 26mg  
EXPNO 2  
PROCNO 1  
Date\_ 20200906  
Time 13.45  
INSTRUM spect  
PROBHD 5 mm PABBO BB-  
PULPROG zgpg30  
TD 65536  
SOLVENT MeOD  
NS 11  
DS 4  
SWH 24038.461 Hz  
FIDRES 0.366798 Hz  
AQ 1.3631988 sec  
RG 203  
DW 20.800 usec  
DE 6.50 usec  
TE 296.1 K  
D1 2.00000000 sec  
D11 0.03000000 sec  
TD0 1

===== CHANNEL f1 =====  
SFO1 100.6228293 MHz  
NUC1 13C  
P1 12.37 usec  
SI 32768  
SF 100.6126314 MHz  
WDW EM  
SSB 0  
LB 1.00 Hz  
GB 0  
PC 1.40

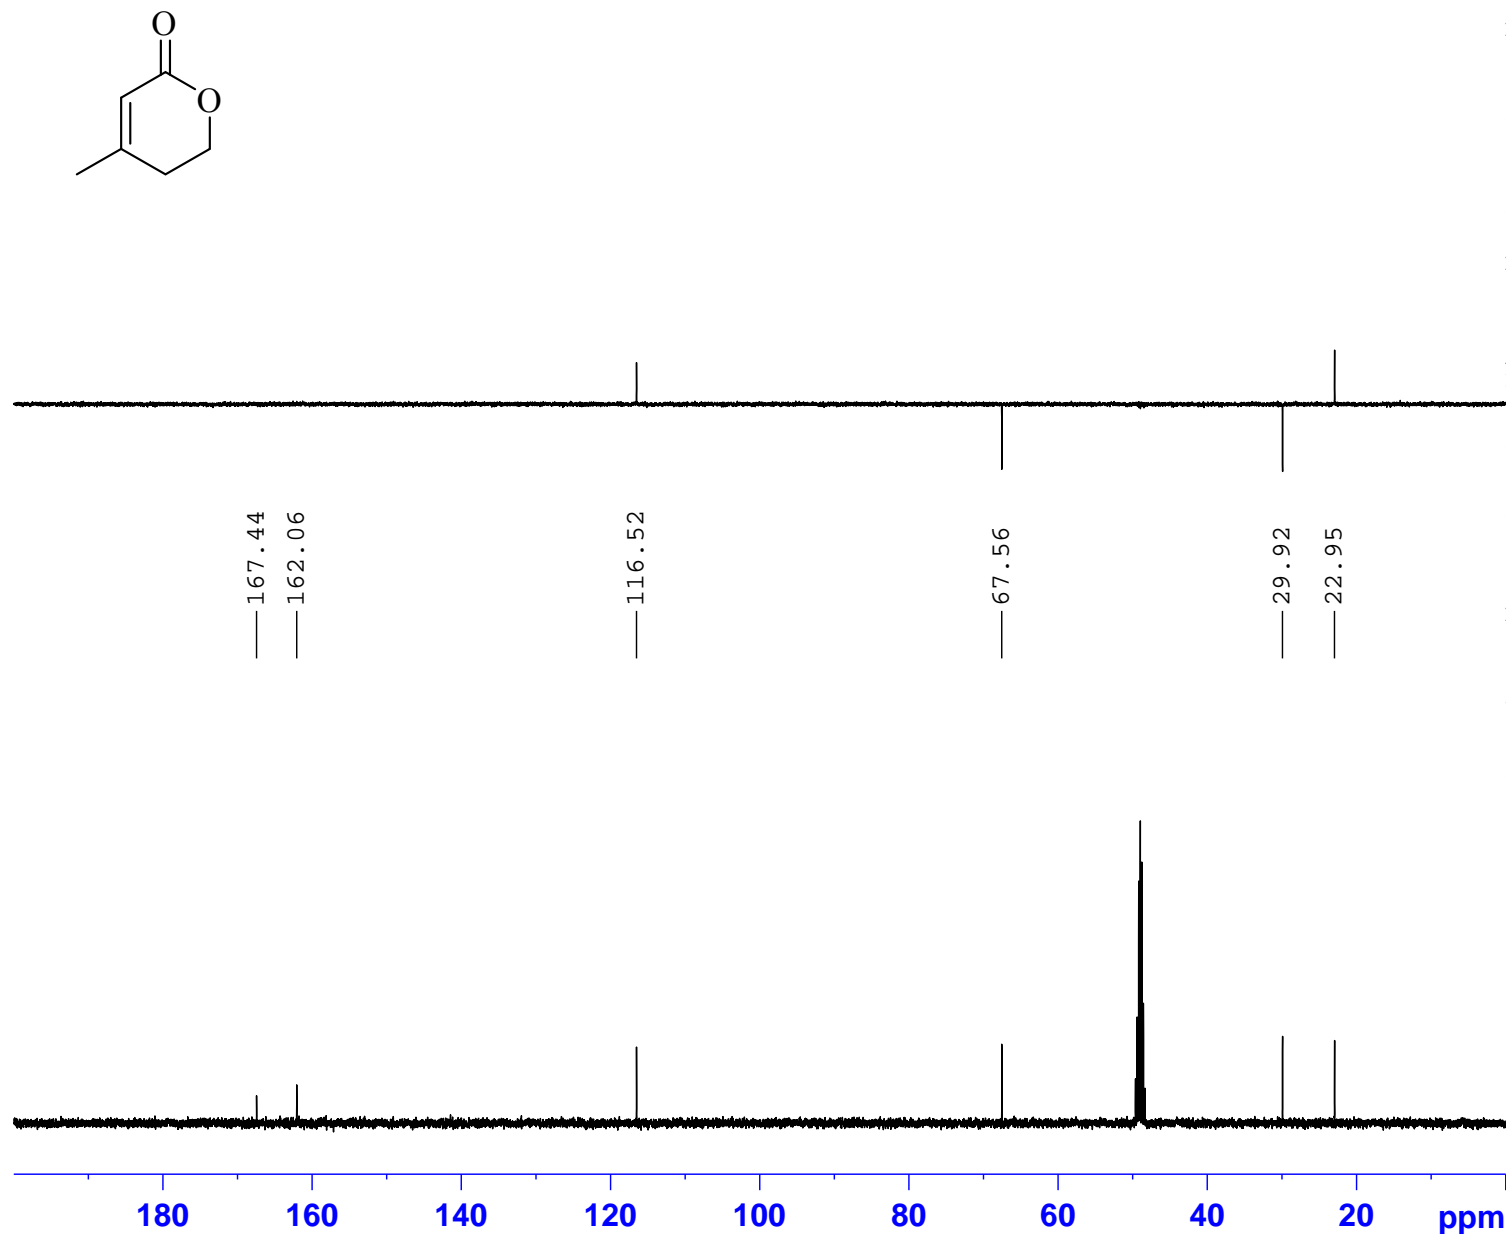

Figure S65. <sup>13</sup>C NMR spectrum of **25**.
